# Supplementary material for: Genetic and Functional Analyses of Archaeal ATP-Dependent RNA Ligase in C/D Box sRNA Circularization and Ribosomal RNA Processing
Source: Front Mol Biosci. 2022 Mar 25;9:811548. doi: 10.3389/fmolb.2022.811548 (PMC9014305; doi:10.3389/fmolb.2022.811548)
Supplement: Supplementary file 4 [file DataSheet2.xlsx]

## Sheet: summary
Supplimentary Data 2
CirRNA Analysis
Sample: Total RNA-Seq	WT	tk1545KO
Criteria:
RNA-Seq reads (51-nts) that does not match the genome but has > 20-nts sequence homology at one end and > 20-nts homology one the other end with the reference sequence.
The two homology segments are encoded in same direction, but are in inverse order in the reference sequence.
Number of RNA-Seq reads with circular junction (not shown)	410073	281828
(i) Number of types of potential circRNAs. Similar circRNA with variation within 5-nts at the circular junction were classified into same group.	12632	9744
(ii) Circular junction reads of more than 100 independent reads	113	63
Differential circRNA read are shown in "Csomparison of WT and tk1545KO" sheet

## Sheet: Comparison of WT and tk1545KO
Name	WT index	tk1545KO index	Circular junction position		length	Number of WT aligned reads	Number of WT junction reads	TK1545-KO-Number of aligned reads	TK1545-KO-Number of junction reads
TK0058	WT-RNA00177	TK1545-KO-RNA0128	51411	51477	67	535	493	194	1
C/D box sR15	WT-RNA00806	N/A	316127	316189	63	611	113	352	0
TK0705	WT-RNA01666	TK1545-KO-RNA1178	609886	609963	78	35776	116	20647	54
TK0895-1	WT-RNA02199	TK1545-KO-RNA1570	780420	780530	111	47473	154	24181	107
TK0895-2	WT-RNA02413	TK1545-KO-RNA1694	781500	781571	72	80394	276	41796	130
C/D box sR28	WT-RNA02665	N/A	832364	832425	62	340	123	156	0
C/D box sR31	WT-RNA03082	TK1545-KO-RNA2187	963853	963919	67	252	343	11	1
C/D box sR41	WT-RNA03891	N/A	1226838	1226899	62	359	202	19	0
C/D box sR42	WT-RNA03893	N/A	1226948	1227017	70	226	145	83	0
ncRNA02	WT-RNA04205	N/A	1257020	1257081	62	42	135	3	0
C/D box sR46	WT-RNA04789	TK1545-KO-RNA3417	1371728	1371790	63	540	258	118	3
C/D box sR49	WT-RNA05123	N/A	1446209	1446268	60	224	376	104	0
TK2109	WT-RNA06664	TK1545-KO-RNA4837	1894519	1894579	61	1092	857	164	4
tRNA-Trp	WT-RNA06794	TK1545-KO-RNA4949	1945728	1945789	62	3195	1415	1680	987
16S rRNA-01	WT-RNA06955	TK1545-KO-RNA5062	2022801	2024382	1582	55116954	6836	30650056	4733
16S rRNA-02	WT-RNA07452	TK1545-KO-RNA5486	2023166	2023285	120	5768261	2630	3358529	1859
16S rRNA-03	WT-RNA08608	TK1545-KO-RNA6445	2023743	2023804	62	4820276	1864	2761320	1316
16S rRNA-04	WT-RNA08544	TK1545-KO-RNA6381	2023722	2023831	110	6100535	1047	3573650	831
16S rRNA-05	WT-RNA09163	TK1545-KO-RNA6897	2024029	2024155	127	8788234	981	4343241	572
16S rRNA-06	WT-RNA08742	TK1545-KO-RNA6572	2023811	2024009	199	12386230	680	6605063	526
16S rRNA-07	WT-RNA08236	TK1545-KO-RNA6139	2023590	2023763	174	9460358	625	5362978	436
16S rRNA-08	WT-RNA08306	TK1545-KO-RNA6199	2023629	2023731	103	6352766	490	3642295	182
16S rRNA-09	WT-RNA08877	TK1545-KO-RNA6686	2023890	2025088	1199	43890429	467	24324470	206
16S rRNA-10	WT-RNA09134	TK1545-KO-RNA6870	2024018	2025830	1813	67816270	434	37957589	157
16S rRNA-11	WT-RNA08209	TK1545-KO-RNA6118	2023583	2023756	174	9691147	430	5506938	289
16S rRNA-12	WT-RNA08113	TK1545-KO-RNA6028	2023558	2023802	245	13468329	401	7668440	174
16S rRNA-13	WT-RNA08210	TK1545-KO-RNA6119	2023584	2023703	120	7098270	366	4118461	287
16S rRNA-14	WT-RNA07917	TK1545-KO-RNA5854	2023499	2023701	203	9754992	351	5557222	290
16S rRNA-15	WT-RNA09140	TK1545-KO-RNA6877	2024021	2024156	136	9233778	304	4563413	204
16S rRNA-16	WT-RNA08311	TK1545-KO-RNA6202	2023633	2023759	127	7018227	284	4042965	221
16S rRNA-17	WT-RNA09375	TK1545-KO-RNA7062	2024199	2025059	861	26973194	272	15583891	67
16S rRNA-18	WT-RNA08103	TK1545-KO-RNA6018	2023556	2024932	1377	48956704	260	27380367	111
16S rRNA-19	WT-RNA09137	TK1545-KO-RNA6873	2024020	2024164	145	11146908	248	5400941	172
16S rRNA-20	WT-RNA09174	TK1545-KO-RNA6909	2024030	2025841	1812	67985984	234	38054997	55
16S rRNA-21	WT-RNA07961	TK1545-KO-RNA5889	2023523	2023703	181	9870768	214	5683768	167
16S rRNA-22	WT-RNA08262	TK1545-KO-RNA6157	2023605	2023759	155	8817184	211	5007728	144
16S rRNA-23	WT-RNA09239	TK1545-KO-RNA6971	2024065	2027623	3559	117751667	209	67081916	58
16S rRNA-24	WT-RNA08080	TK1545-KO-RNA5997	2023552	2026934	3383	125348723	203	70749952	62
16S rRNA-25	WT-RNA08172	TK1545-KO-RNA6081	2023571	2023756	186	11153523	193	6340623	157
16S rRNA-26	WT-RNA07914	TK1545-KO-RNA5848	2023498	2023756	259	12632108	179	7139399	138
16S rRNA-27	WT-RNA08212	TK1545-KO-RNA6120	2023584	2023826	243	11862204	178	6885112	86
16S rRNA-28	WT-RNA07412	TK1545-KO-RNA5448	2023158	2023466	309	12770675	174	7420439	121
16S rRNA-29	WT-RNA07417	TK1545-KO-RNA5452	2023159	2023318	160	7126317	169	4167411	164
16S rRNA-30	WT-RNA08105	TK1545-KO-RNA6022	2023557	2023759	203	11971838	164	6775275	104
16S rRNA-31	WT-RNA08081	TK1545-KO-RNA6000	2023552	2026697	3146	118499066	162	66566633	43
16S rRNA-32	WT-RNA08140	TK1545-KO-RNA6048	2023563	2023757	195	11876802	160	6729071	120
16S rRNA-33	WT-RNA09046	TK1545-KO-RNA6807	2023989	2024667	679	16535784	159	8714052	38
16S rRNA-34	WT-RNA08810	TK1545-KO-RNA6636	2023861	2027312	3452	125349743	155	70742802	87
16S rRNA-35	WT-RNA07421	TK1545-KO-RNA5455	2023159	2023278	120	6417812	152	3745746	118
16S rRNA-36	WT-RNA07454	TK1545-KO-RNA5489	2023167	2023474	308	12090293	134	7002129	108
16S rRNA-37	WT-RNA09345	TK1545-KO-RNA7041	2024170	2024784	615	13589236	131	8012051	38
16S rRNA-38	WT-RNA08153	TK1545-KO-RNA6081	2023566	2023810	245	13825929	127	6340623	157
16S rRNA-39	WT-RNA07812	TK1545-KO-RNA5761	2023452	2027135	3684	136918716	122	77736839	93
16S rRNA-40	WT-RNA07984	TK1545-KO-RNA5907	2023530	2023977	448	21335943	120	12010958	33
16S rRNA-41	WT-RNA08170	TK1545-KO-RNA6080	2023571	2023701	131	8280188	119	4760624	70
16S rRNA-42	WT-RNA08585	TK1545-KO-RNA6422	2023740	2023855	116	6176716	115	3579964	103
16S rRNA-43	WT-RNA07414	TK1545-KO-RNA5450	2023159	2023475	317	12889121	104	7477177	70
16S rRNA-44	WT-RNA08005	TK1545-KO-RNA5928	2023538	2023702	165	9260498	103	5287086	71
16S rRNA-45	WT-RNA08158	TK1545-KO-RNA6066	2023567	2024010	444	24571846	103	13515095	28
16S rRNA-46	WT-RNA08079	TK1545-KO-RNA5994	2023551	2023719	169	10527866	89	5998765	105
23S rRNA-01	WT-RNA09452	TK1545-KO-RNA7125	2024584	2027631	3048	109488453	282955	62941809	205719
23S rRNA-02	WT-RNA09480	TK1545-KO-RNA7144	2024595	2027605	3011	109486015	42016	62940686	23246
23S rRNA-03	WT-RNA10805	TK1545-KO-RNA8243	2025288	2025373	86	4312957	3526	2482090	2783
23S rRNA-04	WT-RNA10438	TK1545-KO-RNA7936	2025071	2025147	77	8477408	1353	4783870	1088
23S rRNA-05	WT-RNA10350	TK1545-KO-RNA7861	2025032	2025151	120	11344995	1095	6259562	730
23S rRNA-06	WT-RNA10476	TK1545-KO-RNA7972	2025093	2025187	95	8109195	869	4564043	639
23S rRNA-07	WT-RNA10378	TK1545-KO-RNA7877	2025039	2025158	120	11235179	730	6186770	475
23S rRNA-08	WT-RNA11591	TK1545-KO-RNA8885	2025959	2026053	95	5240725	645	2982698	338
23S rRNA-09	WT-RNA11552	TK1545-KO-RNA8852	2025929	2027550	1622	51798760	612	29746624	155
23S rRNA-10	WT-RNA11149	TK1545-KO-RNA8504	2025563	2025777	215	10606796	469	6091425	314
23S rRNA-11	WT-RNA10406	TK1545-KO-RNA7904	2025049	2025129	81	10047046	401	5554294	243
23S rRNA-12	WT-RNA09465	TK1545-KO-RNA7135	2024592	2027592	3001	109486468	376	62940887	267
23S rRNA-13	WT-RNA09834	TK1545-KO-RNA7438	2024753	2025116	364	23048109	358	13402396	160
23S rRNA-14	WT-RNA12032	TK1545-KO-RNA9242	2026449	2026561	113	5050486	305	2876557	198
23S rRNA-15	WT-RNA10519	TK1545-KO-RNA8002	2025116	2025213	98	10064638	303	5374886	190
23S rRNA-16	WT-RNA10472	TK1545-KO-RNA7968	2025091	2027110	2020	77070367	302	44324455	151
23S rRNA-17	WT-RNA11194	TK1545-KO-RNA8539	2025617	2025753	137	7449273	301	4159731	152
23S rRNA-18	WT-RNA10403	TK1545-KO-RNA7900	2025046	2027599	2554	90807840	299	51638570	77
23S rRNA-19	WT-RNA11198	TK1545-KO-RNA8542	2025626	2025739	114	6777783	285	3748463	123
23S rRNA-20	WT-RNA10548	TK1545-KO-RNA8026	2025123	2025492	370	17877036	244	9889769	141
23S rRNA-21	WT-RNA10844	TK1545-KO-RNA8271	2025315	2027576	2262	72931103	223	41975871	67
23S rRNA-22	WT-RNA10381	TK1545-KO-RNA7880	2025039	2025142	104	10889574	205	6012651	153
23S rRNA-23	WT-RNA10808	TK1545-KO-RNA8246	2025289	2025390	102	4690500	193	2717045	171
23S rRNA-24	WT-RNA09863	TK1545-KO-RNA7467	2024760	2024935	176	9789322	191	5911321	84
23S rRNA-25	WT-RNA10289	TK1545-KO-RNA7810	2024994	2025753	760	36729906	184	20536818	81
23S rRNA-26	WT-RNA11589	TK1545-KO-RNA8883	2025959	2027040	1082	39548339	184	22901612	57
23S rRNA-27	WT-RNA11428	TK1545-KO-RNA8743	2025809	2025984	176	8578728	178	4994883	123
23S rRNA-28	WT-RNA11595	TK1545-KO-RNA8890	2025963	2026065	103	5648279	162	3208218	101
23S rRNA-29	WT-RNA12161	TK1545-KO-RNA9354	2026703	2026818	116	5090210	161	3102745	133
23S rRNA-30	WT-RNA12315	TK1545-KO-RNA9488	2026940	2027550	611	18079121	151	10402922	53
23S rRNA-31	WT-RNA10648	TK1545-KO-RNA8104	2025184	2025298	115	8114421	149	4308453	216
23S rRNA-32	WT-RNA10267	TK1545-KO-RNA7793	2024977	2025062	86	8035933	146	4501827	59
23S rRNA-33	WT-RNA11590	TK1545-KO-RNA8884	2025959	2026080	122	5973854	144	3388875	88
23S rRNA-34	WT-RNA11265	TK1545-KO-RNA8597	2025666	2027550	1885	62745790	142	36017276	83
23S rRNA-35	WT-RNA09495	TK1545-KO-RNA7154	2024597	2027539	2943	108589840	141	62351435	43
23S rRNA-36	WT-RNA10731	TK1545-KO-RNA8179	2025228	2025707	480	19758068	141	10945894	47
23S rRNA-37	WT-RNA10630	TK1545-KO-RNA8090	2025170	2026524	1355	51162748	137	28960243	33
23S rRNA-38	WT-RNA10115	TK1545-KO-RNA7675	2024906	2024993	88	5972964	136	3443147	125
23S rRNA-39	WT-RNA10226	TK1545-KO-RNA7759	2024955	2026247	1293	54156653	129	30443894	34
23S rRNA-40	WT-RNA10287	TK1545-KO-RNA7807	2024992	2025059	68	7637492	129	4288060	81
23S rRNA-41	WT-RNA11263	TK1545-KO-RNA8595	2025664	2026478	815	32032550	127	18304886	50
23S rRNA-42	WT-RNA10656	TK1545-KO-RNA8114	2025189	2025310	122	8329360	125	4452102	113
23S rRNA-43	WT-RNA11902	TK1545-KO-RNA9127	2026294	2026703	410	16592088	122	9382730	45
23S rRNA-44	WT-RNA10529	TK1545-KO-RNA8012	2025117	2025252	136	11662147	121	6288844	106
23S rRNA-45	WT-RNA10529	TK1545-KO-RNA8012	2025117	2025252	136	11662147	121	6288844	106
23S rRNA-46	WT-RNA12108	TK1545-KO-RNA9305	2026625	2026821	197	7935775	121	4625333	95
23S rRNA-47	WT-RNA11355	TK1545-KO-RNA8673	2025731	2026201	471	18385824	119	10610817	30
23S rRNA-48	WT-RNA10524	TK1545-KO-RNA8008	2025117	2025286	170	13164310	115	7131174	65
23S rRNA-49	WT-RNA09850	TK1545-KO-RNA7455	2024756	2025691	936	43782857	114	24797928	58
23S rRNA-50	WT-RNA10802	TK1545-KO-RNA8239	2025288	2025347	60	2935956	114	1747622	85
23S rRNA-51	WT-RNA11156	TK1545-KO-RNA8511	2025568	2025688	121	6029584	113	3307475	64
23S rRNA-52	WT-RNA09775	TK1545-KO-RNA7392	2024719	2026740	2022	82784315	111	47164831	38
23S rRNA-53	WT-RNA11593	TK1545-KO-RNA8887	2025959	2026017	59	4616378	109	2641404	107
23S rRNA-54	WT-RNA12287	TK1545-KO-RNA9472	2026899	2027062	164	8206412	106	4924205	136
23S rRNA-55	WT-RNA11196	TK1545-KO-RNA8541	2025618	2025733	116	6751960	103	3717103	65

## Sheet: (i) WT - Table 1
index	Circular junction position		length	Number of aligned reads	Number of junction reads
WT-RNA00001	1	2088737	2088737	179208623	12
WT-RNA00002	298	372	75	149	1
WT-RNA00003	1616	1693	78	119	1
WT-RNA00004	1691	1822	132	203	1
WT-RNA00005	2915	2968	54	143	1
WT-RNA00006	3807	3866	60	126	1
WT-RNA00007	4138	4265	128	323	1
WT-RNA00008	4138	4272	135	332	1
WT-RNA00009	5674	5741	68	30	2
WT-RNA00010	6868	2025119	2018252	49312525	1
WT-RNA00011	6933	7003	71	110	1
WT-RNA00012	6994	7123	130	130	1
WT-RNA00013	7329	7462	134	220	1
WT-RNA00014	7535	7686	152	243	1
WT-RNA00015	7671	7724	54	167	1
WT-RNA00016	10251	10331	81	183	3
WT-RNA00017	12416	12500	85	3198	1
WT-RNA00018	12426	12615	190	15939	1
WT-RNA00019	12433	12570	138	6344	1
WT-RNA00020	12450	12551	102	5341	1
WT-RNA00021	12489	1256206	1243718	4249571	1
WT-RNA00022	12498	12635	138	7413	1
WT-RNA00023	12581	1133185	1120605	3629157	1
WT-RNA00024	12612	2024627	2012016	35976681	1
WT-RNA00025	12613	2025459	2012847	54622801	1
WT-RNA00026	12624	2026195	2013572	67483431	1
WT-RNA00027	12626	12751	126	5918	1
WT-RNA00028	12634	12702	69	9552	15
WT-RNA00029	12636	12741	106	11331	3
WT-RNA00030	12639	2025000	2012362	43771748	1
WT-RNA00031	12642	13080	439	19057	1
WT-RNA00032	12642	12812	171	7611	1
WT-RNA00033	12642	12716	75	4611	1
WT-RNA00034	12643	12741	99	5919	1
WT-RNA00035	12644	12751	108	12098	9
WT-RNA00036	12644	12705	62	9146	15
WT-RNA00037	12644	12877	234	8924	2
WT-RNA00038	12654	12820	167	7429	1
WT-RNA00039	12764	2023823	2011060	49827229	1
WT-RNA00040	12871	2024657	2011787	35854094	1
WT-RNA00041	12881	13458	578	20109	1
WT-RNA00042	12964	13205	242	12881	1
WT-RNA00043	13010	13138	129	15142	1
WT-RNA00044	13041	13199	159	9514	1
WT-RNA00045	13066	13193	128	8286	1
WT-RNA00046	13077	13151	75	5948	1
WT-RNA00047	13078	13143	66	10164	3
WT-RNA00048	13084	13136	53	9648	3
WT-RNA00049	13091	13207	117	7512	1
WT-RNA00050	13092	2023797	2010706	24628779	1
WT-RNA00051	13130	13234	105	14355	26
WT-RNA00052	13145	2026539	2013395	74076903	1
WT-RNA00053	13229	13397	169	6084	1
WT-RNA00054	13247	13388	142	5034	1
WT-RNA00055	13282	13387	106	3594	1
WT-RNA00056	13338	2023087	2009750	10522480	1
WT-RNA00057	13358	13483	126	2157	1
WT-RNA00058	13360	1859593	1846234	6496612	1
WT-RNA00059	14910	15048	139	271	1
WT-RNA00060	15682	2023758	2008077	23990428	1
WT-RNA00061	15763	15835	73	259	1
WT-RNA00062	17742	17973	232	275	1
WT-RNA00063	18960	19019	60	143	1
WT-RNA00064	19047	19150	104	220	1
WT-RNA00065	19120	19291	172	260	1
WT-RNA00066	19694	1242001	1222308	3974497	1
WT-RNA00067	22620	22681	62	362	1
WT-RNA00068	22849	22907	59	657	1
WT-RNA00069	23072	23199	128	940	1
WT-RNA00070	23099	23227	129	911	1
WT-RNA00071	23307	23659	353	1693	1
WT-RNA00072	23479	23542	64	869	1
WT-RNA00073	23519	23572	54	511	1
WT-RNA00074	23549	23708	160	945	1
WT-RNA00075	23695	23808	114	706	1
WT-RNA00076	24754	2023378	1998625	15478739	1
WT-RNA00077	25487	25808	322	275	1
WT-RNA00078	27603	27662	60	156	1
WT-RNA00079	27875	27967	93	309	1
WT-RNA00080	27876	27956	81	570	2
WT-RNA00081	28034	28203	170	508	1
WT-RNA00082	28040	28252	213	705	1
WT-RNA00083	28287	28495	209	400	1
WT-RNA00084	28299	28436	138	256	1
WT-RNA00085	28483	2023171	1994689	13483385	1
WT-RNA00086	28564	28624	61	231	1
WT-RNA00087	28782	28855	74	271	1
WT-RNA00088	28792	28863	72	227	1
WT-RNA00089	28881	28982	102	342	1
WT-RNA00090	29165	29311	147	523	1
WT-RNA00091	29978	2023571	1993594	19693108	1
WT-RNA00092	30121	30199	79	309	1
WT-RNA00093	30978	31139	162	805	1
WT-RNA00094	31299	31368	70	309	1
WT-RNA00095	32489	32616	128	1249	1
WT-RNA00096	32738	32790	53	875	1
WT-RNA00097	32923	33019	97	1614	1
WT-RNA00098	32926	33033	108	3338	3
WT-RNA00099	32933	33094	162	2225	2
WT-RNA00100	32933	33040	108	3134	4
WT-RNA00101	32973	35611	2639	25482	1
WT-RNA00102	33927	34070	144	1820	1
WT-RNA00103	34009	34140	132	1885	1
WT-RNA00104	34036	34172	137	2021	1
WT-RNA00105	34167	34229	63	1251	1
WT-RNA00106	34206	34325	120	1899	1
WT-RNA00107	34236	34325	90	1500	1
WT-RNA00108	34248	34369	122	3550	3
WT-RNA00109	34464	35033	570	6634	1
WT-RNA00110	34591	34674	84	1332	1
WT-RNA00111	34625	2024755	1990131	38226416	1
WT-RNA00112	34726	34864	139	1903	1
WT-RNA00113	34734	2025194	1990461	50515455	2
WT-RNA00114	34804	34992	189	2774	1
WT-RNA00115	34849	34931	83	1477	1
WT-RNA00116	34850	34987	138	2271	2
WT-RNA00117	34939	34994	56	1223	1
WT-RNA00118	35080	35241	162	2013	1
WT-RNA00119	35114	35272	159	2118	1
WT-RNA00120	35174	35344	171	2276	1
WT-RNA00121	35540	2023920	1988381	27379208	1
WT-RNA00122	35667	35734	68	1292	1
WT-RNA00123	35711	35787	77	1393	1
WT-RNA00124	35719	35794	76	1154	1
WT-RNA00125	35771	36061	291	1837	1
WT-RNA00126	35795	35865	71	705	1
WT-RNA00127	35882	35940	59	401	1
WT-RNA00128	35900	35994	95	522	1
WT-RNA00129	36079	36135	57	541	1
WT-RNA00130	36135	2026810	1990676	79494715	1
WT-RNA00131	36150	36320	171	1277	1
WT-RNA00132	36216	36369	154	1117	1
WT-RNA00133	36326	36424	99	873	1
WT-RNA00134	36419	36554	136	697	1
WT-RNA00135	36508	36681	174	626	1
WT-RNA00136	36734	36790	57	397	1
WT-RNA00137	36766	36831	66	855	3
WT-RNA00138	36797	36917	121	671	1
WT-RNA00139	36803	2024710	1987908	37587450	1
WT-RNA00140	36900	37040	141	791	1
WT-RNA00141	36982	2026792	1989811	77884024	1
WT-RNA00142	37043	37246	204	887	1
WT-RNA00143	37458	37534	77	509	1
WT-RNA00144	37592	37696	105	764	1
WT-RNA00145	37872	38061	190	974	1
WT-RNA00146	38177	2023896	1985720	27053719	1
WT-RNA00147	38258	2023768	1985511	24114788	1
WT-RNA00148	38271	38342	72	361	1
WT-RNA00149	38314	38403	90	548	1
WT-RNA00150	38351	38474	124	511	1
WT-RNA00151	38488	38550	63	480	2
WT-RNA00152	38488	38601	114	332	1
WT-RNA00153	38489	38653	165	814	1
WT-RNA00154	38643	38717	75	248	1
WT-RNA00155	38676	38855	180	528	1
WT-RNA00156	38698	38790	93	288	1
WT-RNA00157	38790	38858	69	296	1
WT-RNA00158	38915	2023849	1984935	25382948	1
WT-RNA00159	39092	39169	78	657	1
WT-RNA00160	39115	2027258	1988144	87430457	1
WT-RNA00161	39408	39569	162	137	1
WT-RNA00162	41136	41318	183	173	1
WT-RNA00163	42211	42345	135	122	1
WT-RNA00164	45370	45566	197	75	1
WT-RNA00165	47234	47380	147	121	2
WT-RNA00166	47786	47846	61	368	18
WT-RNA00167	47843	2024755	1976913	38196634	1
WT-RNA00168	47845	2026335	1978491	70504680	1
WT-RNA00169	47921	48156	236	338	1
WT-RNA00170	48414	48495	82	175	1
WT-RNA00171	48853	49003	151	247	1
WT-RNA00172	49618	49754	137	272	1
WT-RNA00173	49677	49873	197	308	1
WT-RNA00174	50335	50391	57	1510	1
WT-RNA00175	50911	51054	144	469	1
WT-RNA00176	51280	51417	138	393	1
WT-RNA00177	51411	51477	67	535	493
WT-RNA00178	51471	51605	135	247	1
WT-RNA00179	51477	51566	90	170	1
WT-RNA00180	52241	52382	142	247	1
WT-RNA00181	53332	53469	138	398	1
WT-RNA00182	53361	53416	56	223	1
WT-RNA00183	54644	54736	93	178	1
WT-RNA00184	55960	56043	84	66	1
WT-RNA00185	56147	56285	139	161	1
WT-RNA00186	56816	56921	106	213	1
WT-RNA00187	57062	57280	219	421	1
WT-RNA00188	57246	57298	53	74	1
WT-RNA00189	58240	58346	107	380	1
WT-RNA00190	58256	58355	100	314	1
WT-RNA00191	58381	58576	196	2864	1
WT-RNA00192	58482	58646	165	3377	1
WT-RNA00193	58521	58694	174	3603	1
WT-RNA00194	58530	58616	87	2528	1
WT-RNA00195	58614	58666	53	3039	1
WT-RNA00196	60166	60333	168	633	1
WT-RNA00197	72731	2024215	1951485	33931274	1
WT-RNA00198	79762	79853	92	75	1
WT-RNA00199	80087	80198	112	23	1
WT-RNA00200	86334	86437	104	85	1
WT-RNA00201	87214	2023100	1935887	10597059	1
WT-RNA00202	87396	87520	125	625	1
WT-RNA00203	87735	2025145	1937411	48786681	2
WT-RNA00204	90122	90243	122	2367	1
WT-RNA00205	90131	90253	123	2304	1
WT-RNA00206	90238	90299	62	1791	1
WT-RNA00207	90262	90415	154	2756	1
WT-RNA00208	90452	1863721	1773270	6401806	1
WT-RNA00209	93316	93456	141	178	1
WT-RNA00210	94060	94200	141	174	1
WT-RNA00211	95426	95488	63	112	1
WT-RNA00212	95489	95548	60	80	1
WT-RNA00213	96890	97268	379	479	1
WT-RNA00214	97356	97438	83	216	1
WT-RNA00215	98289	98442	154	298	1
WT-RNA00216	98415	98511	97	205	1
WT-RNA00217	98421	2023758	1925338	23449187	1
WT-RNA00218	99241	99327	87	140	1
WT-RNA00219	100918	101031	114	654	1
WT-RNA00220	100920	101022	103	507	1
WT-RNA00221	100975	101139	165	1110	2
WT-RNA00222	100989	101107	119	882	1
WT-RNA00223	101488	101625	138	437	1
WT-RNA00224	101494	101641	148	453	1
WT-RNA00225	101785	101887	103	435	2
WT-RNA00226	101798	101888	91	391	1
WT-RNA00227	101865	2025224	1923360	52280206	1
WT-RNA00228	101866	2024038	1922173	30645330	1
WT-RNA00229	102002	1158233	1056232	3672803	1
WT-RNA00230	102200	102324	125	671	1
WT-RNA00231	102306	102398	93	442	1
WT-RNA00232	102441	102569	129	328	1
WT-RNA00233	104146	104266	121	766	1
WT-RNA00234	104542	2025089	1920548	47419871	1
WT-RNA00235	104548	104676	129	172	2
WT-RNA00236	105180	1659699	1554520	5756570	1
WT-RNA00237	105384	105455	72	225	1
WT-RNA00238	105670	105774	105	279	1
WT-RNA00239	105672	105755	84	244	1
WT-RNA00240	105968	106139	172	141	1
WT-RNA00241	106347	106452	106	737	1
WT-RNA00242	106403	106456	54	558	1
WT-RNA00243	106502	106600	99	561	1
WT-RNA00244	107313	107427	115	202	1
WT-RNA00245	107316	107465	150	217	1
WT-RNA00246	108306	108447	142	320	1
WT-RNA00247	108449	108675	227	4983	2
WT-RNA00248	108523	108750	228	6620	1
WT-RNA00249	108565	2027624	1919060	90118703	3
WT-RNA00250	108738	1280413	1171676	4189134	1
WT-RNA00251	108896	109187	292	9252	1
WT-RNA00252	109034	109924	891	27685	1
WT-RNA00253	109201	109312	112	10554	12
WT-RNA00254	109254	109312	59	3297	1
WT-RNA00255	109285	2025924	1916640	64048708	1
WT-RNA00256	109327	109400	74	3891	1
WT-RNA00257	109412	109552	141	6524	1
WT-RNA00258	109442	1108309	998868	3325765	1
WT-RNA00259	109462	109524	63	7311	6
WT-RNA00260	109496	110726	1231	34958	1
WT-RNA00261	109530	109605	76	4996	1
WT-RNA00262	109603	2023310	1913708	14358837	1
WT-RNA00263	109645	109740	96	4589	1
WT-RNA00264	109755	2024826	1915072	40019049	1
WT-RNA00265	109928	110027	100	6709	1
WT-RNA00266	109929	110069	141	4618	1
WT-RNA00267	109937	110027	91	6525	4
WT-RNA00268	110027	110518	492	13468	1
WT-RNA00269	110191	110332	142	5074	1
WT-RNA00270	110243	110296	54	1783	1
WT-RNA00271	110359	110463	105	4060	1
WT-RNA00272	110853	111020	168	4561	1
WT-RNA00273	110891	110966	76	2984	1
WT-RNA00274	110945	111034	90	3178	1
WT-RNA00275	111020	111213	194	3598	1
WT-RNA00276	111420	263183	151764	318171	1
WT-RNA00277	111438	111612	175	2345	1
WT-RNA00278	111555	111674	120	2072	1
WT-RNA00279	111579	111745	167	2430	2
WT-RNA00280	111751	2026259	1914509	68107942	1
WT-RNA00281	111752	111961	210	2697	1
WT-RNA00282	112174	112290	117	1810	1
WT-RNA00283	112309	112374	66	2405	1
WT-RNA00284	112318	112383	66	5163	2
WT-RNA00285	112344	112601	258	6467	1
WT-RNA00286	112480	112569	90	2400	1
WT-RNA00287	112574	946189	833616	2745685	1
WT-RNA00288	112655	112710	56	1651	1
WT-RNA00289	112758	112892	135	2933	1
WT-RNA00290	112792	112866	75	4172	4
WT-RNA00291	112799	112881	83	4502	2
WT-RNA00292	112837	112913	77	3789	1
WT-RNA00293	112846	112908	63	1623	1
WT-RNA00294	112850	112973	124	2702	1
WT-RNA00295	114010	114082	73	9	1
WT-RNA00296	114674	2027312	1912639	86486693	1
WT-RNA00297	114732	114839	108	696	1
WT-RNA00298	114837	2024825	1909989	39344602	1
WT-RNA00299	115167	115381	215	495	1
WT-RNA00300	115255	115381	127	215	1
WT-RNA00301	115664	115930	267	418	1
WT-RNA00302	116355	116471	117	297	1
WT-RNA00303	116401	116466	66	531	54
WT-RNA00304	116420	2024060	1907641	31361317	1
WT-RNA00305	116489	116635	147	1080	1
WT-RNA00306	116493	862747	746255	2533450	1
WT-RNA00307	116499	116552	54	1041	2
WT-RNA00308	116930	117111	182	538	1
WT-RNA00309	118901	119012	112	652	2
WT-RNA00310	118931	119012	82	273	1
WT-RNA00311	118953	119306	354	1035	1
WT-RNA00312	119745	119856	112	479	1
WT-RNA00313	120055	120147	93	177	2
WT-RNA00314	120810	120948	139	983	1
WT-RNA00315	120905	120968	64	464	1
WT-RNA00316	121450	2026359	1904910	70610684	1
WT-RNA00317	121472	2023586	1902115	20195785	1
WT-RNA00318	121489	121623	135	7197	1
WT-RNA00319	121490	121632	143	3977	1
WT-RNA00320	121505	121714	210	5855	1
WT-RNA00321	121614	121670	57	2839	2
WT-RNA00322	121712	121897	186	3271	1
WT-RNA00323	121757	866302	744546	2539347	1
WT-RNA00324	123464	123590	127	307	1
WT-RNA00325	123494	123588	95	504	2
WT-RNA00326	123699	123752	54	175	1
WT-RNA00327	124674	1601374	1476701	5429573	1
WT-RNA00328	124695	124842	148	637	1
WT-RNA00329	125053	2023323	1898271	14448119	1
WT-RNA00330	125954	126070	117	222	1
WT-RNA00331	126008	126123	116	226	1
WT-RNA00332	126953	127123	171	179	1
WT-RNA00333	127680	127734	55	249	1
WT-RNA00334	127909	128004	96	272	1
WT-RNA00335	128000	128201	202	384	1
WT-RNA00336	129727	129882	156	404	1
WT-RNA00337	132483	132733	251	101	1
WT-RNA00338	134225	134280	56	110	1
WT-RNA00339	136200	136261	62	106	1
WT-RNA00340	136948	137033	86	390	2
WT-RNA00341	137489	137683	195	194	1
WT-RNA00342	138582	138675	94	2913	3
WT-RNA00343	138650	138757	108	1868	1
WT-RNA00344	138716	138768	53	1030	1
WT-RNA00345	141527	2025088	1883562	46445555	1
WT-RNA00346	141540	141677	138	336	1
WT-RNA00347	142159	142243	85	355	1
WT-RNA00348	142473	142565	93	339	1
WT-RNA00349	144611	144859	249	506	1
WT-RNA00350	144980	145112	133	721	1
WT-RNA00351	146932	146996	65	180	1
WT-RNA00352	147318	2027602	1880285	88225113	1
WT-RNA00353	147409	147517	109	108	1
WT-RNA00354	149024	149081	58	117	2
WT-RNA00355	149355	2027549	1878195	87918303	1
WT-RNA00356	149710	150535	826	3903	1
WT-RNA00357	149894	150004	111	831	1
WT-RNA00358	150273	150378	106	774	1
WT-RNA00359	150363	2027549	1877187	89657212	1
WT-RNA00360	150747	150875	129	1445	4
WT-RNA00361	150790	265129	114340	313739	1
WT-RNA00362	150867	150981	115	801	1
WT-RNA00363	151228	151305	78	1062	2
WT-RNA00364	151311	151450	140	778	1
WT-RNA00365	151373	2024911	1873539	41952225	1
WT-RNA00366	151582	151692	111	494	1
WT-RNA00367	152258	152332	75	179	1
WT-RNA00368	153519	153576	58	573	1
WT-RNA00369	153523	153600	78	1333	1
WT-RNA00370	153527	153613	87	675	1
WT-RNA00371	153577	153635	59	589	1
WT-RNA00372	153595	153654	60	547	1
WT-RNA00373	153616	153690	75	573	1
WT-RNA00374	153668	153756	89	1381	2
WT-RNA00375	153679	153740	62	587	1
WT-RNA00376	156146	156289	144	2040	1
WT-RNA00377	156351	156674	324	4669	1
WT-RNA00378	156385	156459	75	1546	1
WT-RNA00379	156640	156714	75	1748	1
WT-RNA00380	156664	156793	130	5056	2
WT-RNA00381	156774	156840	67	1289	1
WT-RNA00382	156799	156941	143	2232	1
WT-RNA00383	156923	2024217	1867295	34307387	1
WT-RNA00384	157031	1353933	1196903	4559442	1
WT-RNA00385	157061	157261	201	3148	1
WT-RNA00386	157073	157126	54	1486	1
WT-RNA00387	157185	157273	89	1518	1
WT-RNA00388	157226	157309	84	2098	2
WT-RNA00389	157544	157717	174	875	1
WT-RNA00390	157880	158108	229	1190	1
WT-RNA00391	159470	2024208	1864739	34293144	1
WT-RNA00392	159483	2025917	1866435	62424594	1
WT-RNA00393	161634	161724	91	218	1
WT-RNA00394	161985	162039	55	218	2
WT-RNA00395	162392	162463	72	321	2
WT-RNA00396	162420	162485	66	311	1
WT-RNA00397	162646	162764	119	796	1
WT-RNA00398	162763	162830	68	755	1
WT-RNA00399	162876	163071	196	988	1
WT-RNA00400	169885	169978	94	195	1
WT-RNA00401	169987	170078	92	128	1
WT-RNA00402	170170	170331	162	100	1
WT-RNA00403	171624	171708	85	48	1
WT-RNA00404	174516	174572	57	107	1
WT-RNA00405	174995	175110	116	163	1
WT-RNA00406	186009	186065	57	1191	1
WT-RNA00407	186024	186077	54	1229	1
WT-RNA00408	186077	186260	184	1842	1
WT-RNA00409	186386	186577	192	2126	1
WT-RNA00410	186404	186472	69	2327	1
WT-RNA00411	186505	186579	75	2013	1
WT-RNA00412	186576	186654	79	897	1
WT-RNA00413	186713	186787	75	2319	4
WT-RNA00414	186845	2024935	1838091	41625731	1
WT-RNA00415	187294	187386	93	151	1
WT-RNA00416	188437	188559	123	660	1
WT-RNA00417	188688	2025744	1837057	60833781	1
WT-RNA00418	189121	189222	102	353	1
WT-RNA00419	189953	190099	147	162	1
WT-RNA00420	192797	2023756	1830960	23625703	1
WT-RNA00421	192799	192853	55	144	1
WT-RNA00422	192985	2022901	1829917	7466840	1
WT-RNA00423	193140	193283	144	469	1
WT-RNA00424	193142	193225	84	306	1
WT-RNA00425	197031	197098	68	138	1
WT-RNA00426	197151	197247	97	94	1
WT-RNA00427	197330	197409	80	138	1
WT-RNA00428	200341	200526	186	94	1
WT-RNA00429	202007	202101	95	706	1
WT-RNA00430	202223	202383	161	436	1
WT-RNA00431	202828	202932	105	186	1
WT-RNA00432	203269	203347	79	71	1
WT-RNA00433	207562	2024911	1817350	41262952	1
WT-RNA00434	217035	217231	197	18	1
WT-RNA00435	221157	221351	195	93	1
WT-RNA00436	221466	221571	106	130	1
WT-RNA00437	222183	2026157	1803975	67894484	1
WT-RNA00438	223128	223205	78	115	2
WT-RNA00439	223644	223703	60	146	2
WT-RNA00440	223894	224025	132	175	1
WT-RNA00441	224273	224436	164	211	1
WT-RNA00442	224916	225035	120	669	2
WT-RNA00443	224959	225019	61	274	1
WT-RNA00444	225136	225222	87	342	1
WT-RNA00445	225433	225595	163	423	1
WT-RNA00446	225674	225827	154	578	1
WT-RNA00447	225748	225917	170	698	1
WT-RNA00448	225916	225972	57	302	1
WT-RNA00449	225976	2023890	1797915	26317743	1
WT-RNA00450	225982	1601373	1375392	5317506	1
WT-RNA00451	226030	226823	794	2564	1
WT-RNA00452	226295	226388	94	309	1
WT-RNA00453	226665	226800	136	668	1
WT-RNA00454	226810	226891	82	577	1
WT-RNA00455	226833	226894	62	495	1
WT-RNA00456	226869	226985	117	664	1
WT-RNA00457	226988	227054	67	364	1
WT-RNA00458	227469	227602	134	1983	1
WT-RNA00459	228028	228158	131	564	1
WT-RNA00460	228134	228224	91	404	1
WT-RNA00461	232645	2023325	1790681	14600430	1
WT-RNA00462	241073	241186	114	16	1
WT-RNA00463	242272	242671	400	72	1
WT-RNA00464	244778	244903	126	77	1
WT-RNA00465	247273	247376	104	540	1
WT-RNA00466	247791	247937	147	613	1
WT-RNA00467	247875	247937	63	307	1
WT-RNA00468	247903	248072	170	562	1
WT-RNA00469	248044	248136	93	325	1
WT-RNA00470	249255	249311	57	108	1
WT-RNA00471	249927	250072	146	235	1
WT-RNA00472	250162	250287	126	174	1
WT-RNA00473	251411	251554	144	1635	1
WT-RNA00474	251424	251508	85	879	1
WT-RNA00475	251426	251522	97	1161	1
WT-RNA00476	251434	251554	121	1650	1
WT-RNA00477	251441	251757	317	2827	1
WT-RNA00478	251467	2025090	1773624	47214131	1
WT-RNA00479	251543	2022935	1771393	7766379	2
WT-RNA00480	257096	2026049	1768954	64894581	1
WT-RNA00481	257282	257388	107	836	1
WT-RNA00482	257701	257775	75	767	1
WT-RNA00483	257761	257901	141	1099	1
WT-RNA00484	258129	258212	84	907	1
WT-RNA00485	258196	258353	158	2528	2
WT-RNA00486	258264	258345	82	754	1
WT-RNA00487	258293	258370	78	1474	1
WT-RNA00488	258628	258737	110	873	1
WT-RNA00489	259360	2023801	1764442	24314292	1
WT-RNA00490	259365	2025143	1765779	48459579	1
WT-RNA00491	259368	259495	128	39242	2
WT-RNA00492	259368	259663	296	109408	8
WT-RNA00493	259378	259466	89	68713	1
WT-RNA00494	259383	2026274	1766892	137702590	3
WT-RNA00495	259383	259651	269	54195	1
WT-RNA00496	259386	259565	180	46066	2
WT-RNA00497	259390	2023388	1763999	15197803	1
WT-RNA00498	259391	2025059	1765669	46152507	1
WT-RNA00499	259392	2026682	1767291	75753859	1
WT-RNA00500	259393	2023897	1764505	26724889	1
WT-RNA00501	259396	259580	185	46340	1
WT-RNA00502	259407	2025312	1765906	52490306	1
WT-RNA00503	259419	2023990	1764572	28185625	1
WT-RNA00504	259425	2026538	1767114	73524317	2
WT-RNA00505	259426	2023056	1763631	9817000	1
WT-RNA00506	259438	259638	201	78928	1
WT-RNA00507	259439	2024911	1765473	41208119	1
WT-RNA00508	259440	2025666	1766227	58609503	1
WT-RNA00509	259452	259623	172	72263	4
WT-RNA00510	259458	2023666	1764209	21306935	1
WT-RNA00511	259459	2025362	1765904	53264247	1
WT-RNA00512	259466	2025936	1766471	63133847	1
WT-RNA00513	259467	259614	148	56940	4
WT-RNA00514	259468	2027548	1768081	87773639	1
WT-RNA00515	259479	2024619	1765141	34579961	1
WT-RNA00516	259494	259631	138	26322	1
WT-RNA00517	259497	2026479	1766983	72664038	1
WT-RNA00518	259507	2026923	1767417	80588359	1
WT-RNA00519	259543	259646	104	16475	1
WT-RNA00520	259547	2024845	1765299	40270407	1
WT-RNA00521	259551	2025308	1765758	52398004	1
WT-RNA00522	259556	2026772	1767217	78861755	2
WT-RNA00523	259557	2026897	1767341	80434877	1
WT-RNA00524	259558	2025756	1766199	61055518	1
WT-RNA00525	259558	2024885	1765328	41208871	1
WT-RNA00526	259558	2023394	1763837	15574629	1
WT-RNA00527	259559	2026147	1766589	134060960	3
WT-RNA00528	259559	2023156	1763598	12370186	1
WT-RNA00529	259560	2026754	1767195	78114554	1
WT-RNA00530	259561	2026737	1767177	154488408	4
WT-RNA00531	259562	2025139	1765578	48336751	3
WT-RNA00532	259562	2026795	1767234	156582415	2
WT-RNA00533	259562	2023210	1763649	13221362	1
WT-RNA00534	259563	2025977	1766415	129407985	7
WT-RNA00535	259564	2023193	1763630	26318735	4
WT-RNA00536	259564	2024026	1764463	30659851	1
WT-RNA00537	259565	2026481	1766917	73969772	1
WT-RNA00538	259566	2024036	1764471	30879448	1
WT-RNA00539	259566	259628	63	24625	1
WT-RNA00540	259567	259645	79	13076	1
WT-RNA00541	259567	2026154	1766588	67795666	1
WT-RNA00542	259568	2026103	1766536	66991290	1
WT-RNA00543	259569	2026749	1767181	76733039	2
WT-RNA00544	259569	2026902	1767334	80447864	1
WT-RNA00545	259570	623089	363520	1339412	1
WT-RNA00546	259571	2024646	1765076	35188947	1
WT-RNA00547	259571	2023755	1764185	46606301	2
WT-RNA00548	259571	259636	66	23580	20
WT-RNA00549	259571	2026803	1767233	156613964	10
WT-RNA00550	259571	611187	351617	1271861	1
WT-RNA00551	259573	2025982	1766410	65426078	1
WT-RNA00552	259574	2025139	1765566	49259635	2
WT-RNA00553	259575	2023746	1764172	45898842	3
WT-RNA00554	259578	2026810	1767233	156689436	7
WT-RNA00555	259579	2025903	1766325	125844543	2
WT-RNA00556	259579	259641	63	11509	1
WT-RNA00557	259583	2026918	1767336	159482086	2
WT-RNA00558	259587	2025912	1766326	125923328	2
WT-RNA00559	259589	2024064	1764476	31238170	2
WT-RNA00560	259591	2027625	1768035	177875961	2
WT-RNA00561	259596	2026141	1766546	66239291	1
WT-RNA00562	259609	2023497	1763889	17422565	1
WT-RNA00563	259616	2026605	1766990	75156305	1
WT-RNA00564	259618	2025120	1765503	47978240	1
WT-RNA00565	259623	2023917	1764295	27455980	1
WT-RNA00566	259625	2025128	1765504	48198292	1
WT-RNA00567	259639	2024648	1765010	35821077	1
WT-RNA00568	259650	2026965	1767316	81907873	1
WT-RNA00569	259802	319817	60016	256787	1
WT-RNA00570	259856	259956	101	4	1
WT-RNA00571	262032	262312	281	4611	1
WT-RNA00572	262169	262246	78	4025	1
WT-RNA00573	262175	262312	138	4464	1
WT-RNA00574	262205	262267	63	6659	5
WT-RNA00575	262222	262319	98	4135	1
WT-RNA00576	262227	262292	66	7291	5
WT-RNA00577	262239	262361	123	6540	1
WT-RNA00578	262250	2026257	1764008	67855211	1
WT-RNA00579	262250	2023867	1761618	25058565	1
WT-RNA00580	262275	262355	81	5319	1
WT-RNA00581	262277	2023914	1761638	26922756	1
WT-RNA00582	262292	262499	208	11769	1
WT-RNA00583	262292	262374	83	5499	1
WT-RNA00584	262301	262435	135	8721	1
WT-RNA00585	262302	262383	82	10299	4
WT-RNA00586	262319	262472	154	9644	1
WT-RNA00587	262335	262428	94	14099	2
WT-RNA00588	262340	262736	397	26488	1
WT-RNA00589	262350	262433	84	13526	35
WT-RNA00590	262352	262462	111	8358	2
WT-RNA00591	262358	262423	66	6136	1
WT-RNA00592	262393	262476	84	7070	1
WT-RNA00593	262406	262462	57	11403	2
WT-RNA00594	262411	262486	76	6273	1
WT-RNA00595	262495	263007	513	45604	1
WT-RNA00596	262510	262669	160	10537	1
WT-RNA00597	262511	262635	125	16144	2
WT-RNA00598	262511	262712	202	14826	2
WT-RNA00599	262512	262628	117	7471	1
WT-RNA00600	262512	262701	190	13523	1
WT-RNA00601	262522	263048	527	48129	1
WT-RNA00602	262574	262855	282	29467	1
WT-RNA00603	262575	262682	108	10138	1
WT-RNA00604	262576	263047	472	46452	1
WT-RNA00605	262592	2023810	1761219	24117415	1
WT-RNA00606	262615	262800	186	21244	1
WT-RNA00607	262633	262716	84	22866	2
WT-RNA00608	262635	262814	180	22283	1
WT-RNA00609	262640	262723	84	12458	1
WT-RNA00610	262642	2024207	1761566	34140891	1
WT-RNA00611	262650	262741	92	13466	1
WT-RNA00612	262679	662545	399867	1340798	1
WT-RNA00613	262686	262856	171	46406	2
WT-RNA00614	262693	262861	169	23229	3
WT-RNA00615	262715	262861	147	21681	2
WT-RNA00616	262716	262834	119	18342	1
WT-RNA00617	262717	2023458	1760742	16861637	1
WT-RNA00618	262724	262876	153	22183	1
WT-RNA00619	262729	262824	96	31676	7
WT-RNA00620	262732	262854	123	37378	4
WT-RNA00621	262741	262836	96	15791	1
WT-RNA00622	262742	2026186	1763445	66916138	1
WT-RNA00623	262764	2023857	1761094	25003854	1
WT-RNA00624	262767	262841	75	13736	1
WT-RNA00625	262790	262861	72	27033	8
WT-RNA00626	262791	262984	194	23670	1
WT-RNA00627	262796	2024881	1762086	40526817	1
WT-RNA00628	262796	262873	78	28716	2
WT-RNA00629	262797	262910	114	34741	3
WT-RNA00630	262806	2023701	1760896	21680459	1
WT-RNA00631	262817	262873	57	24230	4
WT-RNA00632	262829	2023568	1760740	18941084	1
WT-RNA00633	262839	698913	436075	1390071	1
WT-RNA00634	262845	262943	99	15485	1
WT-RNA00635	262850	1242421	979572	3506754	1
WT-RNA00636	262909	263058	150	17467	2
WT-RNA00637	262909	263009	101	26927	2
WT-RNA00638	262916	2026308	1763393	70465003	1
WT-RNA00639	262917	263067	151	34909	2
WT-RNA00640	262924	263059	136	16084	1
WT-RNA00641	262980	263087	108	12948	1
WT-RNA00642	263005	263070	66	20466	3
WT-RNA00643	263028	263525	498	44760	1
WT-RNA00644	263048	263182	135	30128	5
WT-RNA00645	263051	263173	123	13301	1
WT-RNA00646	263072	263224	153	14274	1
WT-RNA00647	263093	2026541	1763449	73574466	1
WT-RNA00648	263167	263235	69	8402	1
WT-RNA00649	263349	263546	198	20549	1
WT-RNA00650	263370	1842782	1579413	5901431	1
WT-RNA00651	263389	695606	432218	2652091	1
WT-RNA00652	263425	263613	189	44063	3
WT-RNA00653	263434	263634	201	44449	3
WT-RNA00654	263440	263598	159	19941	2
WT-RNA00655	263443	263801	359	34919	1
WT-RNA00656	263443	263645	203	23572	1
WT-RNA00657	263472	263613	142	18230	1
WT-RNA00658	263497	263619	123	14645	1
WT-RNA00659	263531	2026239	1762709	67486187	1
WT-RNA00660	263563	263668	106	15617	1
WT-RNA00661	263568	263828	261	27104	1
WT-RNA00662	263590	2023634	1760045	20763582	1
WT-RNA00663	263594	263781	188	20528	1
WT-RNA00664	263596	491429	227834	656307	1
WT-RNA00665	263619	2024824	1761206	38976851	1
WT-RNA00666	263697	263825	129	13640	1
WT-RNA00667	264078	264152	75	1795	2
WT-RNA00668	264120	265753	1634	35641	1
WT-RNA00669	264136	264223	88	2035	1
WT-RNA00670	264281	264382	102	3486	1
WT-RNA00671	264326	2023926	1759601	26961714	1
WT-RNA00672	264376	264486	111	3840	1
WT-RNA00673	264396	264535	140	4288	2
WT-RNA00674	264405	264512	108	7816	2
WT-RNA00675	264422	265128	707	16197	1
WT-RNA00676	264437	264511	75	3461	1
WT-RNA00677	264473	264817	345	8015	1
WT-RNA00678	264481	2026131	1761651	65936379	1
WT-RNA00679	264522	264665	144	3615	1
WT-RNA00680	264562	264756	195	4265	1
WT-RNA00681	264587	264664	78	4672	6
WT-RNA00682	264621	264770	150	3640	1
WT-RNA00683	264682	264753	72	2076	1
WT-RNA00684	264725	264870	146	4061	1
WT-RNA00685	264776	264877	102	3689	1
WT-RNA00686	264795	2025040	1760246	45613427	1
WT-RNA00687	264923	264988	66	2547	1
WT-RNA00688	265049	265129	81	5778	2
WT-RNA00689	265112	2023446	1758335	16990021	1
WT-RNA00690	265214	2027565	1762352	87737326	1
WT-RNA00691	265273	265430	158	7186	2
WT-RNA00692	265275	2025758	1760484	59628609	1
WT-RNA00693	265295	265585	291	6472	1
WT-RNA00694	265355	2023801	1758447	23656048	1
WT-RNA00695	265362	265508	147	3601	1
WT-RNA00696	265366	265449	84	2267	1
WT-RNA00697	265372	265593	222	5177	3
WT-RNA00698	265384	2023116	1757733	10961709	1
WT-RNA00699	265449	265595	147	3993	1
WT-RNA00700	265504	1839585	1574082	11658506	2
WT-RNA00701	265535	265594	60	2402	2
WT-RNA00702	265559	265639	81	5665	3
WT-RNA00703	265615	265703	89	3197	1
WT-RNA00704	265648	2023934	1758287	27057871	1
WT-RNA00705	265713	265802	90	3688	1
WT-RNA00706	265788	265889	102	7244	3
WT-RNA00707	265812	266003	192	5070	2
WT-RNA00708	265999	266151	153	4285	1
WT-RNA00709	266133	266203	71	2043	1
WT-RNA00710	266144	266289	146	2638	1
WT-RNA00711	266145	1401689	1135545	4338255	1
WT-RNA00712	266218	2026985	1760768	82256916	1
WT-RNA00713	266740	266842	103	222	1
WT-RNA00714	266924	267078	155	184	1
WT-RNA00715	266946	267172	227	240	1
WT-RNA00716	268339	2026539	1758201	73435874	1
WT-RNA00717	268393	268560	168	479	1
WT-RNA00718	268439	268591	153	418	1
WT-RNA00719	268502	268593	92	257	1
WT-RNA00720	268722	268856	135	351	1
WT-RNA00721	269253	269332	80	198	5
WT-RNA00722	269259	2024823	1755565	38814986	1
WT-RNA00723	269271	2026671	1757401	75335666	1
WT-RNA00724	269294	269385	92	134	1
WT-RNA00725	269434	269489	56	132	1
WT-RNA00726	269441	269496	56	261	2
WT-RNA00727	269869	270034	166	172	1
WT-RNA00728	271408	271582	175	263	1
WT-RNA00729	271551	271667	117	264	1
WT-RNA00730	271999	272130	132	185	1
WT-RNA00731	272002	272079	78	143	1
WT-RNA00732	272421	272503	83	63	1
WT-RNA00733	274087	274147	61	13	6
WT-RNA00734	279797	279863	67	142	2
WT-RNA00735	279797	2025587	1745791	55985392	1
WT-RNA00736	281422	2024677	1743256	35478379	1
WT-RNA00737	281895	570121	288227	789629	1
WT-RNA00738	282037	282220	184	1577	1
WT-RNA00739	282368	282495	128	434	1
WT-RNA00740	283294	2023338	1740045	14264389	1
WT-RNA00741	284287	2025707	1741421	58462645	1
WT-RNA00742	285476	285669	194	362	1
WT-RNA00743	285553	285668	116	255	1
WT-RNA00744	286614	286690	77	75	1
WT-RNA00745	287637	287691	55	429	1
WT-RNA00746	287665	287759	95	1394	1
WT-RNA00747	287694	287759	66	919	4
WT-RNA00748	287807	287998	192	190	1
WT-RNA00749	289136	289229	94	516	1
WT-RNA00750	289822	290000	179	359	1
WT-RNA00751	290165	290305	141	334	1
WT-RNA00752	292628	292684	57	221	1
WT-RNA00753	292730	2023062	1730333	9642392	1
WT-RNA00754	293129	2025832	1732704	62128033	1
WT-RNA00755	293230	293283	54	761	2
WT-RNA00756	293366	293486	121	921	1
WT-RNA00757	293401	293473	73	719	1
WT-RNA00758	293766	293849	84	960	1
WT-RNA00759	294002	2026473	1732472	72395418	1
WT-RNA00760	294056	294112	57	1666	5
WT-RNA00761	294278	294332	55	732	1
WT-RNA00762	294501	294595	95	1215	1
WT-RNA00763	294592	294752	161	772	1
WT-RNA00764	294983	2024061	1729079	30981035	1
WT-RNA00765	295281	1956203	1660923	6258883	1
WT-RNA00766	295284	2022970	1727687	7879210	1
WT-RNA00767	295455	295574	120	835	2
WT-RNA00768	295462	295587	126	400	1
WT-RNA00769	295463	295599	137	438	1
WT-RNA00770	295838	296655	818	1151	1
WT-RNA00771	296807	296911	105	157	1
WT-RNA00772	297103	2024726	1727624	36589943	1
WT-RNA00773	297232	297297	66	153	2
WT-RNA00774	298599	298729	131	99	1
WT-RNA00775	299634	299705	72	66	1
WT-RNA00776	299740	2026336	1726597	71218621	1
WT-RNA00777	299964	300068	105	112	1
WT-RNA00778	300203	2026157	1725955	66195141	1
WT-RNA00779	302001	302109	109	379	1
WT-RNA00780	302174	2026000	1723827	65389197	1
WT-RNA00781	302312	302365	54	376	1
WT-RNA00782	302490	302572	83	591	1
WT-RNA00783	302505	302736	232	1359	1
WT-RNA00784	302640	302756	117	1666	2
WT-RNA00785	302722	302790	69	1352	2
WT-RNA00786	302960	303157	198	861	1
WT-RNA00787	304318	2025968	1721651	63537679	1
WT-RNA00788	304744	304798	55	323	1
WT-RNA00789	307013	307117	105	361	1
WT-RNA00790	307018	2023755	1716738	22857164	2
WT-RNA00791	307019	2025746	1718728	60508555	1
WT-RNA00792	307030	307087	58	168	1
WT-RNA00793	307054	2025285	1718232	52886306	1
WT-RNA00794	307055	2024753	1717699	38072067	1
WT-RNA00795	307087	2027617	1720531	89578165	1
WT-RNA00796	308069	308211	143	195	1
WT-RNA00797	309762	309816	55	145	2
WT-RNA00798	311066	311157	92	390	1
WT-RNA00799	311374	311504	131	221	1
WT-RNA00800	312067	312228	162	211	1
WT-RNA00801	313160	313326	167	56	1
WT-RNA00802	314234	1311975	997742	3689486	1
WT-RNA00803	314488	314764	277	1762	1
WT-RNA00804	314928	314987	60	1405	1
WT-RNA00805	315409	2023915	1708507	26690404	1
WT-RNA00806	316127	316189	63	611	113
WT-RNA00807	316224	316358	135	1690	1
WT-RNA00808	316242	316301	60	1890	1
WT-RNA00809	316291	316375	85	4411	2
WT-RNA00810	316428	1419967	1103540	4400220	1
WT-RNA00811	316465	316595	131	5469	1
WT-RNA00812	316582	316758	177	8750	2
WT-RNA00813	316661	316730	70	3819	2
WT-RNA00814	316828	316902	75	1591	1
WT-RNA00815	316902	2023441	1706540	16823340	1
WT-RNA00816	324198	522849	198652	577167	1
WT-RNA00817	332560	332637	78	10	1
WT-RNA00818	335056	2023154	1688099	11804721	1
WT-RNA00819	335306	335394	89	548	1
WT-RNA00820	335367	335455	89	525	1
WT-RNA00821	335385	335442	58	372	1
WT-RNA00822	335849	335904	56	648	1
WT-RNA00823	336049	336123	75	555	1
WT-RNA00824	338353	338472	120	96	1
WT-RNA00825	338936	339072	137	217	1
WT-RNA00826	349004	349126	123	1743	3
WT-RNA00827	349128	2026691	1677564	75564919	1
WT-RNA00828	349205	2027561	1678357	87588583	1
WT-RNA00829	349990	350088	99	830	1
WT-RNA00830	350236	350361	126	1099	1
WT-RNA00831	352254	352367	114	3728	1
WT-RNA00832	352291	352347	57	2017	1
WT-RNA00833	352297	352354	58	2028	1
WT-RNA00834	352401	2023584	1671184	19430471	1
WT-RNA00835	352426	352582	157	9118	1
WT-RNA00836	352538	352738	201	7140	1
WT-RNA00837	352551	352685	135	4779	1
WT-RNA00838	352669	352726	58	3761	1
WT-RNA00839	352707	2024059	1671353	30826939	1
WT-RNA00840	352719	352798	80	4022	1
WT-RNA00841	352720	352785	66	3373	2
WT-RNA00842	352729	352815	87	4046	1
WT-RNA00843	352755	352835	81	3489	1
WT-RNA00844	352785	352850	66	6294	5
WT-RNA00845	352787	2023159	1670373	12277444	1
WT-RNA00846	352788	352908	121	7921	4
WT-RNA00847	352791	352960	170	4169	1
WT-RNA00848	352820	352898	79	5314	2
WT-RNA00849	355992	356103	112	7	1
WT-RNA00850	358734	358907	174	25	1
WT-RNA00851	361859	361969	111	256	1
WT-RNA00852	362057	362134	78	209	1
WT-RNA00853	362224	362343	120	265	1
WT-RNA00854	363295	363389	95	148	1
WT-RNA00855	363394	363582	189	102	1
WT-RNA00856	368258	368479	222	2927	1
WT-RNA00857	368314	368370	57	1939	2
WT-RNA00858	368330	368469	140	5183	8
WT-RNA00859	368342	368481	140	5260	2
WT-RNA00860	368355	368497	143	2549	1
WT-RNA00861	368367	368467	101	2156	1
WT-RNA00862	368374	368478	105	4317	2
WT-RNA00863	368384	368458	75	3496	3
WT-RNA00864	368390	368446	57	2895	4
WT-RNA00865	368393	368467	75	3816	8
WT-RNA00866	368398	368478	81	1867	1
WT-RNA00867	368413	368481	69	3668	3
WT-RNA00868	368414	368554	141	2676	1
WT-RNA00869	368420	368533	114	2297	1
WT-RNA00870	368421	368492	72	1940	1
WT-RNA00871	368422	368583	162	2784	1
WT-RNA00872	368443	368577	135	2627	1
WT-RNA00873	368443	368568	126	2485	1
WT-RNA00874	368479	368614	136	2530	1
WT-RNA00875	368494	368628	135	2255	1
WT-RNA00876	368756	368959	204	1729	1
WT-RNA00877	368951	369019	69	914	1
WT-RNA00878	368963	369030	68	901	1
WT-RNA00879	368988	369197	210	1941	1
WT-RNA00880	371701	371871	171	781	1
WT-RNA00881	371841	371921	81	919	5
WT-RNA00882	372227	372334	108	695	1
WT-RNA00883	372693	372776	84	468	1
WT-RNA00884	372810	373040	231	461	1
WT-RNA00885	373669	373735	67	53	3
WT-RNA00886	380531	380606	76	103	1
WT-RNA00887	383242	383296	55	35	1
WT-RNA00888	383996	384113	118	70	1
WT-RNA00889	384320	384404	85	115	1
WT-RNA00890	384784	384876	93	47	1
WT-RNA00891	389326	389405	80	248	1
WT-RNA00892	389769	389961	193	441	1
WT-RNA00893	390849	2025505	1634657	54325619	1
WT-RNA00894	391989	392045	57	53	1
WT-RNA00895	392600	392706	107	2010	1
WT-RNA00896	392678	392848	171	3590	1
WT-RNA00897	392799	2023558	1630760	18502362	1
WT-RNA00898	392938	393036	99	2914	1
WT-RNA00899	393064	393180	117	6783	2
WT-RNA00900	393106	393179	74	2191	1
WT-RNA00901	393167	2023592	1630426	19544812	1
WT-RNA00902	394903	2027312	1632410	85915717	1
WT-RNA00903	395066	2023760	1628695	23203274	1
WT-RNA00904	395089	395243	155	1241	1
WT-RNA00905	395702	2023314	1627613	13990799	1
WT-RNA00906	395905	395981	77	1555	2
WT-RNA00907	396374	396441	68	838	1
WT-RNA00908	396478	396628	151	1162	1
WT-RNA00909	396500	396628	129	1016	1
WT-RNA00910	396525	396596	72	651	1
WT-RNA00911	396576	2026239	1629664	68629079	1
WT-RNA00912	396715	396794	80	594	1
WT-RNA00913	396736	396817	82	652	1
WT-RNA00914	397092	397265	174	1359	1
WT-RNA00915	397302	397371	70	795	2
WT-RNA00916	397461	397564	104	921	1
WT-RNA00917	397479	2024798	1627320	38344192	2
WT-RNA00918	397482	397535	54	642	1
WT-RNA00919	397484	397544	61	1271	3
WT-RNA00920	397495	397549	55	633	1
WT-RNA00921	397627	397683	57	1711	3
WT-RNA00922	397636	397692	57	880	1
WT-RNA00923	397756	397845	90	2663	1
WT-RNA00924	397868	2026760	1628893	76491785	1
WT-RNA00925	397903	398032	130	1317	1
WT-RNA00926	400306	400368	63	139	1
WT-RNA00927	401067	2025221	1624155	50372778	1
WT-RNA00928	403461	403521	61	214	1
WT-RNA00929	403526	2023677	1620152	21219399	1
WT-RNA00930	403537	403708	172	333	1
WT-RNA00931	403645	403701	57	150	2
WT-RNA00932	404669	404743	75	2739	1
WT-RNA00933	404669	404850	182	5424	1
WT-RNA00934	404799	404942	144	4636	1
WT-RNA00935	404841	2027594	1622754	87671466	1
WT-RNA00936	404852	2025067	1620216	45213223	1
WT-RNA00937	404869	2026796	1621928	77153156	1
WT-RNA00938	404902	404955	54	2593	1
WT-RNA00939	404902	404973	72	3291	2
WT-RNA00940	404903	405046	144	5107	1
WT-RNA00941	404905	405018	114	4524	2
WT-RNA00942	404917	405060	144	5174	1
WT-RNA00943	405121	2026292	1621172	68406073	1
WT-RNA00944	405151	405340	190	2509	1
WT-RNA00945	405163	405255	93	1899	1
WT-RNA00946	405164	2027311	1622148	87433305	1
WT-RNA00947	405164	405338	175	2057	2
WT-RNA00948	405186	405334	149	1687	2
WT-RNA00949	405227	405337	111	888	1
WT-RNA00950	406085	2065756	1659672	87775388	1
WT-RNA00951	406458	406619	162	211	1
WT-RNA00952	406975	407130	156	3495	1
WT-RNA00953	407011	407220	210	4950	1
WT-RNA00954	407069	407143	75	5031	1
WT-RNA00955	407074	2023183	1616110	12752667	1
WT-RNA00956	407117	407179	63	4836	1
WT-RNA00957	407198	2025282	1618085	52691009	1
WT-RNA00958	407204	407369	166	3854	1
WT-RNA00959	407205	407274	70	4363	2
WT-RNA00960	407232	2023897	1616666	26774936	1
WT-RNA00961	407266	2024834	1617569	39500507	1
WT-RNA00962	407282	2027161	1619880	85417337	1
WT-RNA00963	407302	407494	193	4481	1
WT-RNA00964	407404	407491	88	2811	1
WT-RNA00965	407406	2026751	1619346	76368274	1
WT-RNA00966	407469	2027549	1620081	87344001	1
WT-RNA00967	407482	407571	90	2804	1
WT-RNA00968	407486	407578	93	2783	1
WT-RNA00969	407498	407575	78	5187	5
WT-RNA00970	407563	407757	195	4662	1
WT-RNA00971	407662	2023851	1616190	24599317	1
WT-RNA00972	407683	407805	123	3446	2
WT-RNA00973	407686	407745	60	2184	2
WT-RNA00974	407784	407931	148	3580	1
WT-RNA00975	407794	407867	74	4850	10
WT-RNA00976	407884	408017	134	2763	1
WT-RNA00977	409159	409306	148	320	1
WT-RNA00978	409398	409507	110	355	1
WT-RNA00979	409492	1867735	1458244	5705245	1
WT-RNA00980	409609	409691	83	452	1
WT-RNA00981	409897	410008	112	360	1
WT-RNA00982	410116	410258	143	315	1
WT-RNA00983	411009	411069	61	146	1
WT-RNA00984	411177	411413	237	966	1
WT-RNA00985	411381	411566	186	1111	1
WT-RNA00986	412002	412077	76	651	1
WT-RNA00987	412362	412558	197	1049	1
WT-RNA00988	412664	412807	144	1379	1
WT-RNA00989	412800	412869	70	906	1
WT-RNA00990	412808	412878	71	1939	2
WT-RNA00991	412833	412942	110	1291	1
WT-RNA00992	412853	412924	72	944	1
WT-RNA00993	412917	2023210	1610294	12949476	1
WT-RNA00994	413813	415728	1916	2009	1
WT-RNA00995	414012	414207	196	695	1
WT-RNA00996	414102	414273	172	404	1
WT-RNA00997	414223	414328	106	112	1
WT-RNA00998	415103	415168	66	29	1
WT-RNA00999	419853	419957	105	768	1
WT-RNA01000	419897	419969	73	598	3
WT-RNA01001	419900	1575506	1155607	4536611	1
WT-RNA01002	419904	419975	72	478	1
WT-RNA01003	419910	420038	129	1424	2
WT-RNA01004	420337	420413	77	216	1
WT-RNA01005	420632	420687	56	493	1
WT-RNA01006	420856	2024814	1603959	39054477	1
WT-RNA01007	420992	421082	91	2192	2
WT-RNA01008	421270	421389	120	1861	1
WT-RNA01009	421344	421419	76	2686	1
WT-RNA01010	421384	421457	74	2783	2
WT-RNA01011	421489	421623	135	1898	1
WT-RNA01012	421492	2023812	1602321	24152317	1
WT-RNA01013	421593	421811	219	2644	1
WT-RNA01014	421633	421747	115	2674	1
WT-RNA01015	421738	421847	110	1549	1
WT-RNA01016	421742	421951	210	2945	1
WT-RNA01017	421905	422149	245	3173	1
WT-RNA01018	422041	422162	122	1587	1
WT-RNA01019	422059	422130	72	2344	2
WT-RNA01020	422123	2023921	1601799	26622242	1
WT-RNA01021	422207	2025144	1602938	48892835	1
WT-RNA01022	422260	422328	69	2323	1
WT-RNA01023	422393	422593	201	2422	1
WT-RNA01024	422402	422458	57	1154	1
WT-RNA01025	422415	1401593	979179	4053233	1
WT-RNA01026	422453	422518	66	1269	1
WT-RNA01027	422522	422641	120	1460	1
WT-RNA01028	422606	985288	562683	2282909	1
WT-RNA01029	422610	422682	73	784	1
WT-RNA01030	422635	422692	58	662	1
WT-RNA01031	423691	423790	100	217	1
WT-RNA01032	424241	2024168	1599928	32820154	1
WT-RNA01033	424248	2026481	1602234	73499899	1
WT-RNA01034	425545	425653	109	44	1
WT-RNA01035	427517	1409280	981764	4162287	1
WT-RNA01036	429223	429482	260	1458	1
WT-RNA01037	429885	429977	93	808	1
WT-RNA01038	430016	430192	177	1265	1
WT-RNA01039	430025	2024006	1593982	28614073	1
WT-RNA01040	430179	430233	55	466	1
WT-RNA01041	430451	430603	153	848	1
WT-RNA01042	430469	430880	412	1615	1
WT-RNA01043	430515	430574	60	499	1
WT-RNA01044	430591	430709	119	679	1
WT-RNA01045	430660	430721	62	386	1
WT-RNA01046	431080	431280	201	989	2
WT-RNA01047	431789	431933	145	948	1
WT-RNA01048	431903	431989	87	666	1
WT-RNA01049	432389	2027547	1595159	87162711	1
WT-RNA01050	432392	2024646	1592255	35278741	1
WT-RNA01051	432616	2023827	1591212	23763237	1
WT-RNA01052	432880	433002	123	343	2
WT-RNA01053	432970	433092	123	130	1
WT-RNA01054	434714	434880	167	323	1
WT-RNA01055	435081	2026468	1591388	72109413	1
WT-RNA01056	435957	436055	99	112	1
WT-RNA01057	436187	2025119	1588933	47451337	1
WT-RNA01058	443448	2026478	1583031	72132250	1
WT-RNA01059	445256	445311	56	76	1
WT-RNA01060	446411	446537	127	42	1
WT-RNA01061	449456	2026691	1577236	75349244	1
WT-RNA01062	449698	449874	177	248	1
WT-RNA01063	449960	450170	211	563	1
WT-RNA01064	449973	450068	96	329	1
WT-RNA01065	451073	451195	123	8730	1
WT-RNA01066	451074	451244	171	14232	1
WT-RNA01067	451080	2025122	1574043	48408515	1
WT-RNA01068	451092	2023416	1572325	15355640	1
WT-RNA01069	451097	2023586	1572490	19265748	1
WT-RNA01070	451099	451256	158	32473	9
WT-RNA01071	451099	451236	138	13854	1
WT-RNA01072	451100	451279	180	19239	1
WT-RNA01073	451145	2025478	1574334	53843658	1
WT-RNA01074	451156	2022994	1571839	7953765	1
WT-RNA01075	451160	2025548	1574389	55256187	1
WT-RNA01076	451194	451315	122	17211	1
WT-RNA01077	451198	2025288	1574091	52641695	1
WT-RNA01078	451205	2023072	1571868	9531839	1
WT-RNA01079	451218	2023272	1572055	13238377	1
WT-RNA01080	451220	451333	114	35613	1
WT-RNA01081	451223	451293	71	13741	1
WT-RNA01082	451237	451301	65	13730	1
WT-RNA01083	451253	1165893	714641	2869434	1
WT-RNA01084	451255	451439	185	25870	1
WT-RNA01085	451263	451416	154	23793	1
WT-RNA01086	451280	451415	136	22661	1
WT-RNA01087	451291	451439	149	23032	1
WT-RNA01088	451292	451365	74	29759	1
WT-RNA01089	451297	2026744	1575448	76123462	1
WT-RNA01090	451300	451371	72	28927	7
WT-RNA01091	451300	1945789	1494490	5946081	1
WT-RNA01092	451303	2026364	1575062	71255007	1
WT-RNA01093	451309	2023894	1572586	26436231	1
WT-RNA01094	451311	2026759	1575449	76325117	1
WT-RNA01095	451326	451507	182	24049	1
WT-RNA01096	451371	451634	264	26824	1
WT-RNA01097	451372	451480	109	17273	1
WT-RNA01098	451374	574488	123115	466353	1
WT-RNA01099	451375	451452	78	30089	3
WT-RNA01100	451375	451559	185	25912	1
WT-RNA01101	451378	451491	114	34103	3
WT-RNA01102	451384	451449	66	26189	3
WT-RNA01103	451393	2024035	1572643	29766064	1
WT-RNA01104	451394	451449	56	10844	2
WT-RNA01105	451396	451500	105	13560	1
WT-RNA01106	451434	2023165	1571732	12493023	1
WT-RNA01107	451435	2025557	1574123	56532010	1
WT-RNA01108	451451	547989	96539	333264	1
WT-RNA01109	451529	451637	109	9469	1
WT-RNA01110	451547	451679	133	8927	1
WT-RNA01111	451561	451634	74	7358	1
WT-RNA01112	451571	451629	59	4039	1
WT-RNA01113	453472	453606	135	4084	1
WT-RNA01114	453481	2024638	1571158	35102666	1
WT-RNA01115	453631	1280447	826817	3331511	1
WT-RNA01116	453651	453779	129	3473	1
WT-RNA01117	453656	2025147	1571492	48840915	1
WT-RNA01118	453979	454533	555	13327	1
WT-RNA01119	453988	454096	109	7341	6
WT-RNA01120	454024	454092	69	5487	3
WT-RNA01121	454049	454147	99	3481	1
WT-RNA01122	454095	2023616	1569522	19656723	1
WT-RNA01123	454146	2025528	1571383	54782822	1
WT-RNA01124	454176	2024936	1570761	40971355	1
WT-RNA01125	454329	454382	54	2323	1
WT-RNA01126	454413	2023150	1568738	11424945	1
WT-RNA01127	454420	454614	195	3636	1
WT-RNA01128	454466	454561	96	2238	1
WT-RNA01129	454508	454560	53	1268	1
WT-RNA01130	454721	454815	95	124	2
WT-RNA01131	454722	462279	7558	73659	1
WT-RNA01132	454723	454805	83	260	9
WT-RNA01133	454730	2024166	1569437	32573292	1
WT-RNA01134	454757	2023789	1569033	23517107	1
WT-RNA01135	454762	2023066	1568305	9306366	1
WT-RNA01136	454762	2023676	1568915	20755859	1
WT-RNA01137	454768	2024728	1569961	36816453	1
WT-RNA01138	454777	2024315	1569539	33300696	1
WT-RNA01139	455230	455411	182	271	1
WT-RNA01140	456558	456632	75	419	1
WT-RNA01141	456562	456645	84	399	1
WT-RNA01142	456870	457007	138	1076	1
WT-RNA01143	457033	457197	165	1272	1
WT-RNA01144	457041	457205	165	1286	1
WT-RNA01145	457305	457442	138	1391	1
WT-RNA01146	457754	457993	240	456	1
WT-RNA01147	457771	457892	122	264	1
WT-RNA01148	458449	2025975	1567527	64695035	1
WT-RNA01149	458452	2023949	1565498	26744293	1
WT-RNA01150	458454	458526	73	6206	3
WT-RNA01151	458458	460433	1976	57973	1
WT-RNA01152	458459	458635	177	30605	3
WT-RNA01153	458468	458643	176	15350	1
WT-RNA01154	458474	458650	177	15674	2
WT-RNA01155	458501	458646	146	31598	1
WT-RNA01156	458575	2027018	1568444	82261067	1
WT-RNA01157	458711	2027548	1568838	88890534	1
WT-RNA01158	458714	458959	246	27191	1
WT-RNA01159	458753	458906	154	16985	1
WT-RNA01160	458842	458984	143	18485	1
WT-RNA01161	458891	459028	138	17422	2
WT-RNA01162	458914	459061	148	21133	1
WT-RNA01163	458921	459106	186	21924	1
WT-RNA01164	458922	459083	162	42850	4
WT-RNA01165	458927	459052	126	19675	1
WT-RNA01166	458935	459061	127	19529	2
WT-RNA01167	458966	459052	87	15415	1
WT-RNA01168	458973	459028	56	9860	1
WT-RNA01169	458994	459155	162	14463	1
WT-RNA01170	459005	459165	161	12466	1
WT-RNA01171	459020	2024665	1565646	35447172	1
WT-RNA01172	459036	1612843	1153808	4694271	1
WT-RNA01173	459040	2024995	1565956	42547059	1
WT-RNA01174	459041	2024634	1565594	34359874	1
WT-RNA01175	459047	2025235	1566189	51630951	1
WT-RNA01176	459050	2024214	1565165	32955557	1
WT-RNA01177	459055	459165	111	8959	1
WT-RNA01178	459058	459179	122	8602	1
WT-RNA01179	461451	461523	73	180	1
WT-RNA01180	462074	462273	200	5451	2
WT-RNA01181	462077	2023468	1561392	32948229	1
WT-RNA01182	462132	2025332	1563201	53012594	1
WT-RNA01183	462133	2024208	1562076	32936359	1
WT-RNA01184	462145	2026821	1564677	78556140	2
WT-RNA01185	462146	462228	83	2644	1
WT-RNA01186	462147	462251	105	2644	1
WT-RNA01187	462149	2023379	1561231	14656536	1
WT-RNA01188	462151	462242	92	2663	1
WT-RNA01189	462169	2025225	1563057	50255091	1
WT-RNA01190	462697	462858	162	1252	1
WT-RNA01191	463251	463399	149	1169	1
WT-RNA01192	463446	463605	160	1129	2
WT-RNA01193	463853	463946	94	814	1
WT-RNA01194	464083	464182	100	659	1
WT-RNA01195	464229	2023896	1559668	26017555	1
WT-RNA01196	464358	464434	77	1479	3
WT-RNA01197	464359	464424	66	698	1
WT-RNA01198	464376	464451	76	725	1
WT-RNA01199	464574	464729	156	1656	1
WT-RNA01200	464636	464739	104	1414	1
WT-RNA01201	464671	464783	113	1267	1
WT-RNA01202	464705	464896	192	1757	1
WT-RNA01203	464760	464905	146	1318	1
WT-RNA01204	464761	464897	137	2574	2
WT-RNA01205	464761	464977	217	1523	1
WT-RNA01206	464762	464960	199	1598	1
WT-RNA01207	464762	465010	249	1524	1
WT-RNA01208	465467	465592	126	1346	1
WT-RNA01209	465531	465752	222	2300	1
WT-RNA01210	465577	465639	63	772	1
WT-RNA01211	465638	2023803	1558166	23665305	1
WT-RNA01212	465697	465763	67	1179	1
WT-RNA01213	465731	465787	57	1160	1
WT-RNA01214	465877	2023920	1558044	26320864	1
WT-RNA01215	465921	466043	123	1832	1
WT-RNA01216	465984	466120	137	1844	1
WT-RNA01217	466041	2025296	1559256	51535957	1
WT-RNA01218	466076	466248	173	1983	1
WT-RNA01219	466085	2023595	1557511	19523548	1
WT-RNA01220	466114	466195	82	1238	1
WT-RNA01221	466195	2023823	1557629	23540064	1
WT-RNA01222	466202	2024008	1557807	29056871	1
WT-RNA01223	466282	466382	101	1112	1
WT-RNA01224	466443	466538	96	943	1
WT-RNA01225	466454	466537	84	458	2
WT-RNA01226	466454	466528	75	657	1
WT-RNA01227	466723	466848	126	87	2
WT-RNA01228	467654	467736	83	1049	19
WT-RNA01229	467672	467782	111	775	1
WT-RNA01230	467784	467916	133	1104	1
WT-RNA01231	468038	468318	281	1996	1
WT-RNA01232	468161	468317	157	1295	1
WT-RNA01233	468167	468298	132	2277	1
WT-RNA01234	469548	469613	66	10	1
WT-RNA01235	469746	469951	206	22	1
WT-RNA01236	470366	470429	64	74	2
WT-RNA01237	470367	470497	131	43	1
WT-RNA01238	470441	2053671	1583231	87421150	1
WT-RNA01239	471915	472099	185	257	1
WT-RNA01240	472372	472506	135	175	1
WT-RNA01241	472564	863504	390941	1648419	1
WT-RNA01242	472955	473090	136	636	1
WT-RNA01243	473171	473462	292	1343	1
WT-RNA01244	473355	473431	77	533	1
WT-RNA01245	473394	473463	70	1119	4
WT-RNA01246	473523	473645	123	541	1
WT-RNA01247	473642	473722	81	915	2
WT-RNA01248	475005	475130	126	205	1
WT-RNA01249	475915	475987	73	277	2
WT-RNA01250	476844	476913	70	75	2
WT-RNA01251	477107	2026470	1549364	71909554	1
WT-RNA01252	477245	477364	120	133	1
WT-RNA01253	477835	477891	57	57	1
WT-RNA01254	478113	478214	102	489	1
WT-RNA01255	478588	478650	63	566	1
WT-RNA01256	478757	478825	69	897	1
WT-RNA01257	479671	479736	66	359	1
WT-RNA01258	479985	480140	156	2460	2
WT-RNA01259	479996	480133	138	1260	1
WT-RNA01260	480003	2025826	1545824	61554122	1
WT-RNA01261	480827	481057	231	19152	1
WT-RNA01262	480838	480986	149	14400	1
WT-RNA01263	480856	481029	174	17930	1
WT-RNA01264	480857	480996	140	29985	1
WT-RNA01265	480877	480936	60	14229	3
WT-RNA01266	480886	480995	110	29555	1
WT-RNA01267	480921	2024981	1544061	42230357	1
WT-RNA01268	480922	481119	198	21483	1
WT-RNA01269	480940	481119	180	20824	1
WT-RNA01270	480943	481038	96	25491	4
WT-RNA01271	480949	481011	63	10924	1
WT-RNA01272	480951	481025	75	11723	2
WT-RNA01273	480955	481035	81	24603	53
WT-RNA01274	480961	481042	82	25225	2
WT-RNA01275	480962	481127	166	20274	1
WT-RNA01276	480968	1343674	862707	3609477	1
WT-RNA01277	480976	481032	57	11233	1
WT-RNA01278	480977	481042	66	11715	1
WT-RNA01279	480982	481116	135	19092	2
WT-RNA01280	480984	481049	66	11582	1
WT-RNA01281	480986	481042	57	21880	31
WT-RNA01282	480990	481112	123	36133	3
WT-RNA01283	481009	481150	142	14794	1
WT-RNA01284	481020	481130	111	14075	1
WT-RNA01285	481021	481150	130	13444	1
WT-RNA01286	481030	481115	86	24371	3
WT-RNA01287	481038	481118	81	22952	2
WT-RNA01288	481048	2022935	1541888	6994854	1
WT-RNA01289	485242	485357	116	367	1
WT-RNA01290	487962	488051	90	493	1
WT-RNA01291	489835	489918	84	444	1
WT-RNA01292	489937	490014	78	481	1
WT-RNA01293	490099	490190	92	565	1
WT-RNA01294	490766	490878	113	4574	1
WT-RNA01295	490781	490878	98	4436	1
WT-RNA01296	490781	490938	158	8081	1
WT-RNA01297	490814	2024883	1534070	39854033	1
WT-RNA01298	490901	491068	168	12175	1
WT-RNA01299	490907	2025384	1534478	53879467	1
WT-RNA01300	490909	780989	290081	1050568	1
WT-RNA01301	490910	2025447	1534538	53284577	1
WT-RNA01302	490911	2024821	1533911	38256466	1
WT-RNA01303	490916	491046	131	10444	1
WT-RNA01304	490919	490972	54	11198	54
WT-RNA01305	490924	491076	153	11911	1
WT-RNA01306	490934	491068	135	10580	1
WT-RNA01307	490970	491189	220	25652	3
WT-RNA01308	491014	491121	108	8177	1
WT-RNA01309	491022	491077	56	12637	2
WT-RNA01310	491028	491084	57	12633	3
WT-RNA01311	491030	1785272	1294243	4980797	1
WT-RNA01312	491036	491092	57	11435	6
WT-RNA01313	491057	491131	75	5704	1
WT-RNA01314	491100	491190	91	10392	1
WT-RNA01315	491182	2024674	1533493	34866100	1
WT-RNA01316	491228	491598	371	19536	1
WT-RNA01317	491290	491353	64	6222	1
WT-RNA01318	491315	2023196	1531882	12518526	1
WT-RNA01319	491328	491426	99	7936	1
WT-RNA01320	491350	2023846	1532497	24201131	1
WT-RNA01321	491357	491464	108	7814	1
WT-RNA01322	491387	491493	107	8370	1
WT-RNA01323	491426	2026788	1535363	76732545	1
WT-RNA01324	491457	491522	66	11491	3
WT-RNA01325	491472	491565	94	13853	3
WT-RNA01326	491477	2023152	1531676	11264265	1
WT-RNA01327	491492	2026337	1534846	70712636	1
WT-RNA01328	491524	491678	155	8320	1
WT-RNA01329	491576	2024945	1533370	40849012	1
WT-RNA01330	491581	491652	72	4327	1
WT-RNA01331	491649	1642067	1150419	4646540	1
WT-RNA01332	491660	2025065	1533406	45558746	1
WT-RNA01333	491672	1885542	1393871	5546503	1
WT-RNA01334	491923	2023450	1531528	16391852	1
WT-RNA01335	491964	492056	93	1444	1
WT-RNA01336	492002	492063	62	1143	1
WT-RNA01337	492018	492126	109	1930	1
WT-RNA01338	492019	492097	79	3112	2
WT-RNA01339	492025	2024942	1532918	41452178	1
WT-RNA01340	492073	2023603	1531531	19234741	1
WT-RNA01341	492116	492235	120	2579	1
WT-RNA01342	492178	492249	72	1911	1
WT-RNA01343	492221	492371	151	5651	2
WT-RNA01344	492289	492482	194	3377	1
WT-RNA01345	492348	492653	306	4633	1
WT-RNA01346	492501	492596	96	1763	1
WT-RNA01347	492595	492763	169	2627	1
WT-RNA01348	492650	2024178	1531529	33277030	1
WT-RNA01349	492654	492758	105	2205	2
WT-RNA01350	492839	492915	77	1831	1
WT-RNA01351	492904	493050	147	2990	1
WT-RNA01352	493076	2024817	1531742	38709768	1
WT-RNA01353	493164	493276	113	2104	1
WT-RNA01354	493261	493332	72	1702	1
WT-RNA01355	493264	493350	87	1688	1
WT-RNA01356	493268	493375	108	3180	2
WT-RNA01357	494789	494926	138	629	1
WT-RNA01358	494962	495073	112	634	1
WT-RNA01359	495408	495589	182	830	1
WT-RNA01360	495853	495975	123	875	1
WT-RNA01361	495971	2026251	1530281	66990571	1
WT-RNA01362	495997	496143	147	1166	1
WT-RNA01363	496076	496175	100	705	1
WT-RNA01364	496114	496194	81	464	1
WT-RNA01365	496137	496261	125	583	2
WT-RNA01366	496402	496510	109	279	1
WT-RNA01367	497407	2026124	1528718	65128439	1
WT-RNA01368	497481	497828	348	3921	1
WT-RNA01369	497566	497792	227	2518	1
WT-RNA01370	498030	498116	87	1771	1
WT-RNA01371	498037	498090	54	1256	2
WT-RNA01372	498072	498263	192	3105	1
WT-RNA01373	498262	2026320	1528059	68642868	1
WT-RNA01374	498346	498581	236	3062	1
WT-RNA01375	498347	498460	114	1911	1
WT-RNA01376	498348	498416	69	2935	3
WT-RNA01377	498351	498437	87	3464	9
WT-RNA01378	498387	498610	224	2585	1
WT-RNA01379	498439	498609	171	2019	1
WT-RNA01380	498612	2024909	1526298	40314919	1
WT-RNA01381	498626	2022877	1524252	5982376	1
WT-RNA01382	498760	498969	210	3117	1
WT-RNA01383	498775	499011	237	3291	1
WT-RNA01384	498830	498975	146	2313	1
WT-RNA01385	498946	2026750	1527805	75949186	1
WT-RNA01386	498996	499124	129	1640	1
WT-RNA01387	499085	499218	134	2041	2
WT-RNA01388	506419	506594	176	176	1
WT-RNA01389	506947	507015	69	158	1
WT-RNA01390	507080	507227	148	190	1
WT-RNA01391	508763	508922	160	421	1
WT-RNA01392	509222	509275	54	492	3
WT-RNA01393	509329	509459	131	327	1
WT-RNA01394	510537	510710	174	147	1
WT-RNA01395	511093	511258	166	243	1
WT-RNA01396	511798	511863	66	94	2
WT-RNA01397	513527	2026287	1512761	67823491	1
WT-RNA01398	513533	2023162	1509630	12070408	1
WT-RNA01399	513538	513711	174	5996	1
WT-RNA01400	513558	2023949	1510392	26492286	1
WT-RNA01401	513638	2026217	1512580	67790034	1
WT-RNA01402	513641	2024703	1511063	36122163	1
WT-RNA01403	517102	517245	144	22	1
WT-RNA01404	517773	517911	139	10	1
WT-RNA01405	522205	522298	94	1	1
WT-RNA01406	522229	2025251	1503023	50422404	1
WT-RNA01407	523556	523672	117	20	1
WT-RNA01408	527187	2024925	1497739	40612563	1
WT-RNA01409	527224	527332	109	3671	1
WT-RNA01410	527225	527344	120	7282	3
WT-RNA01411	527273	527353	81	2109	1
WT-RNA01412	529424	529544	121	51	1
WT-RNA01413	533720	533866	147	290	1
WT-RNA01414	534866	534980	115	343	1
WT-RNA01415	534994	535143	150	786	1
WT-RNA01416	535286	535375	90	330	1
WT-RNA01417	535672	535849	178	667	1
WT-RNA01418	535766	535924	159	630	1
WT-RNA01419	535998	536167	170	570	1
WT-RNA01420	536151	536252	102	347	1
WT-RNA01421	536423	536494	72	198	1
WT-RNA01422	537010	2026132	1489123	66607679	1
WT-RNA01423	537957	538076	120	191	1
WT-RNA01424	538937	539153	217	238	1
WT-RNA01425	539136	539204	69	89	1
WT-RNA01426	539488	539563	76	80	1
WT-RNA01427	540391	540534	144	133	1
WT-RNA01428	540508	2027321	1486814	85422790	1
WT-RNA01429	540921	540973	53	137	1
WT-RNA01430	544099	544221	123	68	1
WT-RNA01431	544381	544434	54	42	1
WT-RNA01432	547826	547953	128	1852	1
WT-RNA01433	547845	547922	78	1367	1
WT-RNA01434	548054	548513	460	3349	1
WT-RNA01435	548061	548135	75	1538	1
WT-RNA01436	548256	548322	67	565	1
WT-RNA01437	548517	548574	58	375	2
WT-RNA01438	548813	548981	169	481	1
WT-RNA01439	548870	548930	61	262	1
WT-RNA01440	549286	2027550	1478265	86893310	1
WT-RNA01441	549313	549378	66	290	1
WT-RNA01442	549338	549410	73	305	1
WT-RNA01443	549594	2023100	1473507	9384743	1
WT-RNA01444	549607	549738	132	701	1
WT-RNA01445	550415	550480	66	52	1
WT-RNA01446	550474	550540	67	52	1
WT-RNA01447	550929	551078	150	108	1
WT-RNA01448	552405	552508	104	420	1
WT-RNA01449	552557	2022986	1470430	7447959	1
WT-RNA01450	553365	553421	57	601	1
WT-RNA01451	553628	553684	57	310	1
WT-RNA01452	553877	554006	130	71	1
WT-RNA01453	555560	555658	99	51	1
WT-RNA01454	555948	556055	108	568	1
WT-RNA01455	556853	557036	184	2258	1
WT-RNA01456	556868	556945	78	1298	1
WT-RNA01457	557017	2025253	1468237	50426653	1
WT-RNA01458	558052	558177	126	314	1
WT-RNA01459	558165	558338	174	313	1
WT-RNA01460	558231	558373	143	256	1
WT-RNA01461	558320	558386	67	167	1
WT-RNA01462	558818	558879	62	84	46
WT-RNA01463	559593	2026131	1466539	66573255	1
WT-RNA01464	559657	2027367	1467711	85635635	1
WT-RNA01465	559661	560242	582	16468	1
WT-RNA01466	559791	2023941	1464151	26924136	1
WT-RNA01467	559793	2026682	1466890	74816967	1
WT-RNA01468	559813	559872	60	3214	1
WT-RNA01469	559824	560036	213	7139	1
WT-RNA01470	559861	559981	121	4690	1
WT-RNA01471	559915	560028	114	4539	1
WT-RNA01472	559953	2026474	1466522	72906061	1
WT-RNA01473	559955	2025154	1465200	47617157	1
WT-RNA01474	560171	560242	72	3563	1
WT-RNA01475	560282	753359	193078	638709	1
WT-RNA01476	560291	2025873	1465583	62368310	1
WT-RNA01477	560370	560495	126	4696	1
WT-RNA01478	560432	560594	163	5714	1
WT-RNA01479	560437	560526	90	3546	1
WT-RNA01480	560447	560581	135	8987	7
WT-RNA01481	560464	2026878	1466415	77542858	1
WT-RNA01482	560494	560831	338	6824	1
WT-RNA01483	560577	560832	256	5234	2
WT-RNA01484	560600	560833	234	4406	1
WT-RNA01485	560617	560774	158	3726	1
WT-RNA01486	560667	560822	156	2750	1
WT-RNA01487	560741	2026466	1465726	71675683	1
WT-RNA01488	560857	560986	130	785	3
WT-RNA01489	561231	1344876	783646	3409626	1
WT-RNA01490	561653	561746	94	448	1
WT-RNA01491	561678	2023683	1462006	20769714	1
WT-RNA01492	561713	561783	71	399	2
WT-RNA01493	562333	562428	96	469	1
WT-RNA01494	562800	562937	138	474	1
WT-RNA01495	562949	563122	174	543	1
WT-RNA01496	562994	563061	68	706	3
WT-RNA01497	563083	563864	782	1951	1
WT-RNA01498	564719	564772	54	103	1
WT-RNA01499	564749	564877	129	195	1
WT-RNA01500	564785	564883	99	154	1
WT-RNA01501	566738	566880	143	198	1
WT-RNA01502	566878	566941	64	113	1
WT-RNA01503	567338	567406	69	203	1
WT-RNA01504	567367	567446	80	229	1
WT-RNA01505	567491	567607	117	952	1
WT-RNA01506	567680	567740	61	1543	1
WT-RNA01507	567764	567850	87	2302	2
WT-RNA01508	567790	567855	66	1976	2
WT-RNA01509	567846	567914	69	3775	5
WT-RNA01510	567999	568052	54	1377	1
WT-RNA01511	568001	568102	102	2289	1
WT-RNA01512	568028	568105	78	4155	3
WT-RNA01513	568183	568299	117	4705	1
WT-RNA01514	568203	568295	93	2156	2
WT-RNA01515	568238	568303	66	1614	1
WT-RNA01516	568736	568819	84	1668	1
WT-RNA01517	568934	569026	93	2695	1
WT-RNA01518	569016	569171	156	5149	1
WT-RNA01519	569025	569172	148	5062	1
WT-RNA01520	569147	569221	75	3917	1
WT-RNA01521	569224	569302	79	4708	2
WT-RNA01522	569317	569370	54	5061	1
WT-RNA01523	569324	569379	56	4691	3
WT-RNA01524	569354	2025768	1456415	58907360	1
WT-RNA01525	569420	569485	66	3335	1
WT-RNA01526	569445	569639	195	6441	1
WT-RNA01527	569474	2025248	1455775	51363994	1
WT-RNA01528	569591	569700	110	3701	1
WT-RNA01529	569620	569746	127	4303	1
WT-RNA01530	569621	569831	211	6316	1
WT-RNA01531	569654	569746	93	2849	2
WT-RNA01532	569660	569731	72	2585	1
WT-RNA01533	569661	569744	84	5698	1
WT-RNA01534	569685	2024833	1455149	38311896	1
WT-RNA01535	569717	569796	80	2882	1
WT-RNA01536	569781	2025642	1455862	56046092	1
WT-RNA01537	569788	2024629	1454842	34535978	1
WT-RNA01538	569790	2024981	1455192	42639786	1
WT-RNA01539	569801	1404143	834343	3572706	1
WT-RNA01540	569854	570015	162	5783	1
WT-RNA01541	569856	569909	54	5909	4
WT-RNA01542	570019	570122	104	6663	4
WT-RNA01543	570044	570132	89	2154	2
WT-RNA01544	571258	2027550	1456293	88522418	1
WT-RNA01545	571745	571875	131	647	1
WT-RNA01546	572004	572200	197	845	1
WT-RNA01547	572174	572281	108	438	1
WT-RNA01548	572313	572395	83	405	1
WT-RNA01549	572526	572654	129	543	1
WT-RNA01550	572671	572753	83	462	1
WT-RNA01551	572786	572928	143	527	1
WT-RNA01552	573069	573134	66	316	1
WT-RNA01553	573190	573339	150	737	1
WT-RNA01554	573685	573798	114	480	1
WT-RNA01555	573756	573824	69	294	1
WT-RNA01556	573799	573958	160	498	1
WT-RNA01557	573812	574099	288	756	1
WT-RNA01558	573881	2023811	1449931	23160617	1
WT-RNA01559	574772	2023879	1449108	24964174	1
WT-RNA01560	578385	578558	174	114	1
WT-RNA01561	579315	579449	135	9516	1
WT-RNA01562	579331	579466	136	9376	1
WT-RNA01563	579334	579401	68	6638	1
WT-RNA01564	579338	579464	127	19027	5
WT-RNA01565	579353	579495	143	9515	1
WT-RNA01566	579360	579414	55	8842	1
WT-RNA01567	579992	580051	60	636	1
WT-RNA01568	580217	580280	64	1060	2
WT-RNA01569	580624	580680	57	318	1
WT-RNA01570	581071	581179	109	902	2
WT-RNA01571	581953	582018	66	233	1
WT-RNA01572	582323	582440	118	295	1
WT-RNA01573	582920	583118	199	477	1
WT-RNA01574	583030	583171	142	398	1
WT-RNA01575	583034	583107	74	224	1
WT-RNA01576	583085	583189	105	259	1
WT-RNA01577	583563	583729	167	1431	1
WT-RNA01578	583823	584308	486	6126	1
WT-RNA01579	583910	584068	159	3694	1
WT-RNA01580	584021	584125	105	1509	1
WT-RNA01581	584038	584091	54	1916	3
WT-RNA01582	584178	584270	93	3923	5
WT-RNA01583	584287	584418	132	2657	1
WT-RNA01584	584292	584495	204	3819	1
WT-RNA01585	584297	584355	59	1481	1
WT-RNA01586	584384	584576	193	3481	1
WT-RNA01587	584386	584484	99	4473	4
WT-RNA01588	584415	584476	62	1724	1
WT-RNA01589	584432	584503	72	1786	1
WT-RNA01590	584623	584697	75	1767	1
WT-RNA01591	584666	584746	81	1923	1
WT-RNA01592	584693	584773	81	2039	1
WT-RNA01593	584711	2023653	1438943	20191046	1
WT-RNA01594	584765	2025142	1440378	48276107	1
WT-RNA01595	584933	2026756	1441824	75769837	1
WT-RNA01596	584938	2085110	1500173	87195097	1
WT-RNA01597	584969	585028	60	1898	1
WT-RNA01598	584994	585046	53	3602	1
WT-RNA01599	585032	585157	126	4191	2
WT-RNA01600	585732	585869	138	349	2
WT-RNA01601	588154	588280	127	33	1
WT-RNA01602	588167	588220	54	26	1
WT-RNA01603	589809	589960	152	233	1
WT-RNA01604	590014	590159	146	755	1
WT-RNA01605	590291	590353	63	1020	2
WT-RNA01606	590605	1481090	890486	3735333	1
WT-RNA01607	590795	590905	111	1500	1
WT-RNA01608	590903	591034	132	1901	1
WT-RNA01609	591002	591108	107	1916	1
WT-RNA01610	591173	2024676	1433504	34590043	1
WT-RNA01611	591280	1326458	735179	2977689	1
WT-RNA01612	591444	591866	423	6317	1
WT-RNA01613	591463	591543	81	1959	1
WT-RNA01614	591468	591535	68	1784	1
WT-RNA01615	591778	2025817	1434040	59734230	1
WT-RNA01616	591915	592112	198	3143	1
WT-RNA01617	591995	592108	114	2264	1
WT-RNA01618	592061	592123	63	1479	1
WT-RNA01619	592109	592204	96	1948	1
WT-RNA01620	592444	2027472	1435029	85636272	1
WT-RNA01621	595640	595853	214	171	1
WT-RNA01622	596521	596580	60	85	5
WT-RNA01623	597136	597282	147	139	1
WT-RNA01624	600085	600157	73	28	1
WT-RNA01625	600355	600524	170	56	1
WT-RNA01626	601196	601281	86	63	1
WT-RNA01627	602623	602835	213	185	1
WT-RNA01628	603775	603909	135	248	1
WT-RNA01629	606217	606303	87	126	1
WT-RNA01630	606569	606742	174	178	1
WT-RNA01631	607912	608162	251	264	1
WT-RNA01632	608189	608315	127	127	1
WT-RNA01633	609673	609805	133	17892	3
WT-RNA01634	609674	609797	124	16425	2
WT-RNA01635	609674	609777	104	13991	1
WT-RNA01636	609714	609796	83	16407	1
WT-RNA01637	609716	609910	195	34650	1
WT-RNA01638	609736	609827	92	40356	6
WT-RNA01639	609743	609907	165	31638	3
WT-RNA01640	609744	609945	202	35798	1
WT-RNA01641	609748	609809	62	14142	2
WT-RNA01642	609754	609874	121	22532	1
WT-RNA01643	609777	609938	162	31251	1
WT-RNA01644	609778	609945	168	62499	1
WT-RNA01645	609778	609988	211	37249	1
WT-RNA01646	609778	2026380	1416603	71203548	1
WT-RNA01647	609778	2023754	1413977	22424672	1
WT-RNA01648	609778	2027545	1417768	86554643	1
WT-RNA01649	609779	609912	134	54253	1
WT-RNA01650	609779	609907	129	52140	7
WT-RNA01651	609780	2025150	1415371	47408626	1
WT-RNA01652	609784	2023156	1413373	22436282	3
WT-RNA01653	609795	2026591	1416797	74060782	1
WT-RNA01654	609796	2025981	1416186	62917913	1
WT-RNA01655	609798	2023679	1413882	40816354	2
WT-RNA01656	609803	609945	143	54613	1
WT-RNA01657	609805	609927	123	25883	2
WT-RNA01658	609809	2027311	1417503	86747135	1
WT-RNA01659	609810	610164	355	51200	1
WT-RNA01660	609813	609917	105	23541	6
WT-RNA01661	609836	609946	111	25337	1
WT-RNA01662	609841	609980	140	25644	1
WT-RNA01663	609877	2024698	1414822	34962005	1
WT-RNA01664	609877	2026240	1416364	66519318	1
WT-RNA01665	609883	609942	60	17057	2
WT-RNA01666	609886	609963	78	35776	116
WT-RNA01667	609891	610020	130	24379	1
WT-RNA01668	609891	1339319	729429	3096609	1
WT-RNA01669	609891	610095	205	31040	1
WT-RNA01670	609902	609957	56	15943	1
WT-RNA01671	609906	610097	192	30064	2
WT-RNA01672	609907	2026822	1416916	78130660	1
WT-RNA01673	609914	609970	57	15205	1
WT-RNA01674	609915	610103	189	59850	1
WT-RNA01675	609915	2024748	1414834	37100009	1
WT-RNA01676	609919	2025115	1415197	46701396	1
WT-RNA01677	609921	609977	57	14088	1
WT-RNA01678	609926	610037	112	19731	1
WT-RNA01679	609927	2023850	1413924	47364826	3
WT-RNA01680	609928	1309248	699321	2838846	1
WT-RNA01681	609928	610018	91	18137	1
WT-RNA01682	610020	2025017	1414998	43777627	1
WT-RNA01683	610031	1788286	1178256	4750401	1
WT-RNA01684	610037	2024045	1414009	29909773	1
WT-RNA01685	610045	610168	124	19422	1
WT-RNA01686	610048	2023570	1413523	36022146	1
WT-RNA01687	610065	610165	101	17219	1
WT-RNA01688	610066	610440	375	52408	1
WT-RNA01689	610067	610138	72	29479	2
WT-RNA01690	610086	780913	170828	626215	1
WT-RNA01691	610092	2026981	1416890	79672682	1
WT-RNA01692	610109	2023702	1413594	20942169	1
WT-RNA01693	610134	610190	57	26671	1
WT-RNA01694	610153	2025277	1415125	50840708	1
WT-RNA01695	610157	610289	133	22603	1
WT-RNA01696	610165	610233	69	13925	1
WT-RNA01697	610190	610297	108	39416	1
WT-RNA01698	610191	610285	95	17713	1
WT-RNA01699	610195	610376	182	29033	1
WT-RNA01700	610199	610356	158	25727	1
WT-RNA01701	610200	610292	93	36747	4
WT-RNA01702	610200	610284	85	17063	1
WT-RNA01703	610203	610305	103	39566	4
WT-RNA01704	610228	1212852	602625	2298193	1
WT-RNA01705	610250	610306	57	30399	10
WT-RNA01706	610252	1691149	1080898	4359250	1
WT-RNA01707	610256	2026140	1415885	66475017	1
WT-RNA01708	610257	2023843	1413587	23806900	2
WT-RNA01709	610271	610360	90	37498	2
WT-RNA01710	610350	1938561	1328212	5289252	1
WT-RNA01711	610354	610459	106	35188	1
WT-RNA01712	610370	2026690	1416321	150645459	1
WT-RNA01713	610376	610702	327	46083	1
WT-RNA01714	610386	610523	138	22066	1
WT-RNA01715	610397	2027548	1417152	88329158	1
WT-RNA01716	610413	610604	192	28273	1
WT-RNA01717	610417	2024061	1413645	59487648	1
WT-RNA01718	610418	610513	96	34686	14
WT-RNA01719	610426	610564	139	21483	1
WT-RNA01720	610430	2025251	1414822	50102807	1
WT-RNA01721	610435	610605	171	26170	1
WT-RNA01722	610495	610653	159	50697	2
WT-RNA01723	610504	610604	101	17867	1
WT-RNA01724	610510	610586	77	15677	1
WT-RNA01725	610584	610657	74	16221	1
WT-RNA01726	610587	2023582	1412996	18544665	1
WT-RNA01727	610593	610755	163	26514	1
WT-RNA01728	610603	610725	123	22142	1
WT-RNA01729	610618	2025766	1415149	59940166	1
WT-RNA01730	610620	2023852	1413233	23382628	1
WT-RNA01731	610620	610735	116	22034	2
WT-RNA01732	610676	610750	75	16743	1
WT-RNA01733	610681	2025328	1414648	52455348	1
WT-RNA01734	610683	2027607	1416925	86871132	1
WT-RNA01735	610683	2024234	1413552	32398862	1
WT-RNA01736	610684	2023918	1413235	25752730	1
WT-RNA01737	610687	2026338	1415652	69040611	2
WT-RNA01738	610705	781642	170938	807798	1
WT-RNA01739	610707	610976	270	43156	1
WT-RNA01740	610719	2027226	1416508	85282800	1
WT-RNA01741	610723	781196	170474	655682	1
WT-RNA01742	610730	610809	80	33140	3
WT-RNA01743	610733	2023915	1413183	26249879	1
WT-RNA01744	610736	2024897	1414162	40308303	1
WT-RNA01745	610737	611038	302	43173	1
WT-RNA01746	610738	610817	80	15834	3
WT-RNA01747	610755	610961	207	33222	1
WT-RNA01748	610756	610808	53	25354	2
WT-RNA01749	610759	610920	162	49764	1
WT-RNA01750	610771	2026547	1415777	72496958	1
WT-RNA01751	610786	1201291	590506	2210245	1
WT-RNA01752	610793	2025339	1414547	51409083	1
WT-RNA01753	610802	610963	162	28824	1
WT-RNA01754	610818	610922	105	16489	1
WT-RNA01755	610841	610972	132	22509	1
WT-RNA01756	610843	610961	119	21628	1
WT-RNA01757	610845	610937	93	16425	1
WT-RNA01758	610851	610992	142	23889	2
WT-RNA01759	610853	610959	107	40201	4
WT-RNA01760	610867	610973	107	20772	1
WT-RNA01761	610897	610994	98	20570	1
WT-RNA01762	610903	2026982	1416080	79578419	1
WT-RNA01763	610931	611019	89	17106	1
WT-RNA01764	610960	611092	133	26886	1
WT-RNA01765	610986	2023563	1412578	17945243	1
WT-RNA01766	610993	2027547	1416555	88148728	1
WT-RNA01767	610994	611183	190	31605	2
WT-RNA01768	610995	611123	129	22201	3
WT-RNA01769	611012	611173	162	29158	1
WT-RNA01770	611012	611115	104	19253	1
WT-RNA01771	611017	2024744	1413728	36070926	1
WT-RNA01772	611025	2023858	1412834	23357274	1
WT-RNA01773	611035	611196	162	25480	1
WT-RNA01774	611041	2023086	1412046	8922981	2
WT-RNA01775	611073	611153	81	18858	1
WT-RNA01776	611074	2023759	1412686	22307690	1
WT-RNA01777	611092	611188	97	17565	1
WT-RNA01778	611093	611181	89	18992	1
WT-RNA01779	611108	2025767	1414660	58618647	1
WT-RNA01780	611115	611246	132	14322	1
WT-RNA01781	611119	611187	69	11098	1
WT-RNA01782	611146	2023921	1412776	26340883	1
WT-RNA01783	611321	611423	103	2890	1
WT-RNA01784	611328	611392	65	2256	1
WT-RNA01785	611406	611512	107	3246	1
WT-RNA01786	611412	611532	121	3735	1
WT-RNA01787	611413	611467	55	2312	1
WT-RNA01788	611417	611475	59	2424	1
WT-RNA01789	611439	2025859	1414421	60222008	1
WT-RNA01790	611489	611593	105	2872	1
WT-RNA01791	611536	611592	57	3991	6
WT-RNA01792	611564	611644	81	2299	1
WT-RNA01793	611565	2026479	1414915	71379571	1
WT-RNA01794	611578	611658	81	2234	1
WT-RNA01795	611590	611696	107	2303	1
WT-RNA01796	611591	611728	138	2832	1
WT-RNA01797	611742	611825	84	4017	2
WT-RNA01798	611912	2024812	1412901	38205324	1
WT-RNA01799	611918	611980	63	3867	1
WT-RNA01800	611933	612010	78	4188	2
WT-RNA01801	611949	612024	76	1781	1
WT-RNA01802	612078	2023804	1411727	22646838	1
WT-RNA01803	612249	2024856	1412608	39284327	1
WT-RNA01804	612457	612523	67	1918	1
WT-RNA01805	612483	612608	126	2882	1
WT-RNA01806	612710	612937	228	2445	1
WT-RNA01807	613154	613385	232	695	1
WT-RNA01808	613186	613245	60	236	1
WT-RNA01809	613560	613651	92	421	1
WT-RNA01810	613859	2024753	1410895	37007561	1
WT-RNA01811	614160	614243	84	598	1
WT-RNA01812	614628	614725	98	786	1
WT-RNA01813	614773	614913	141	1478	1
WT-RNA01814	614816	614870	55	1599	5
WT-RNA01815	615113	615262	150	1108	1
WT-RNA01816	615907	615999	93	1210	1
WT-RNA01817	615948	616002	55	1838	8
WT-RNA01818	615986	616154	169	959	1
WT-RNA01819	617877	617963	87	71	1
WT-RNA01820	620766	2023759	1402994	21832330	1
WT-RNA01821	620888	621296	409	4961	1
WT-RNA01822	620909	2024752	1403844	36982117	1
WT-RNA01823	620914	621277	364	4498	1
WT-RNA01824	620919	2027028	1406110	80588140	1
WT-RNA01825	621088	2023855	1402768	23713445	1
WT-RNA01826	621091	2025597	1404507	56238373	1
WT-RNA01827	621201	2023583	1402383	18278859	1
WT-RNA01828	621224	2025198	1403975	47932865	1
WT-RNA01829	621248	2026432	1405185	72221868	1
WT-RNA01830	621254	2025751	1404498	59599205	1
WT-RNA01831	621257	621362	106	2217	1
WT-RNA01832	621265	621384	120	2356	1
WT-RNA01833	621379	2024614	1403236	33778263	1
WT-RNA01834	621652	621789	138	3863	3
WT-RNA01835	621725	621807	83	1418	2
WT-RNA01836	621949	622036	88	2097	3
WT-RNA01837	622115	2024947	1402833	41025882	1
WT-RNA01838	622156	622257	102	1580	1
WT-RNA01839	622206	2026602	1404397	73821357	1
WT-RNA01840	622206	2027551	1405346	86448714	1
WT-RNA01841	622207	2027622	1405416	88485116	1
WT-RNA01842	622225	622335	111	3215	2
WT-RNA01843	622411	622502	92	1432	1
WT-RNA01844	622529	622661	133	4930	2
WT-RNA01845	622555	2023738	1401184	21221186	1
WT-RNA01846	622715	622867	153	4294	2
WT-RNA01847	622755	623092	338	3686	1
WT-RNA01848	622868	622998	131	1887	1
WT-RNA01849	622881	623093	213	2528	1
WT-RNA01850	622931	623001	71	1236	1
WT-RNA01851	622959	623092	134	1804	1
WT-RNA01852	623150	2024810	1401661	37568835	1
WT-RNA01853	627081	627140	60	62	2
WT-RNA01854	627461	2026568	1399108	72472747	1
WT-RNA01855	627618	2025496	1397879	54415520	1
WT-RNA01856	628554	628634	81	102	1
WT-RNA01857	629819	629899	81	157	1
WT-RNA01858	629874	630042	169	466	1
WT-RNA01859	630098	2027592	1397495	86728374	1
WT-RNA01860	630181	630277	97	374	1
WT-RNA01861	630576	630812	237	753	1
WT-RNA01862	630845	630986	142	631	1
WT-RNA01863	630975	631090	116	647	1
WT-RNA01864	631544	631716	173	446	1
WT-RNA01865	631799	2027546	1395748	86300847	1
WT-RNA01866	632246	632311	66	128	1
WT-RNA01867	634107	634189	83	207	2
WT-RNA01868	634112	634206	95	406	2
WT-RNA01869	638218	638343	126	212	1
WT-RNA01870	638251	2024981	1386731	42261520	1
WT-RNA01871	640469	640588	120	124	1
WT-RNA01872	640791	640982	192	313	1
WT-RNA01873	642755	642985	231	192	1
WT-RNA01874	643417	643491	75	520	1
WT-RNA01875	643614	643715	102	252	1
WT-RNA01876	643618	643686	69	522	4
WT-RNA01877	643645	643727	83	196	1
WT-RNA01878	644007	644201	195	752	1
WT-RNA01879	644746	644844	99	750	1
WT-RNA01880	645091	645159	69	622	2
WT-RNA01881	645741	2025349	1379609	51415143	1
WT-RNA01882	648311	648416	106	325	1
WT-RNA01883	649262	649339	78	242	1
WT-RNA01884	649725	649808	84	268	3
WT-RNA01885	650671	650754	84	116	1
WT-RNA01886	651006	651193	188	58	1
WT-RNA01887	651520	651621	102	87	1
WT-RNA01888	651603	652260	658	424	1
WT-RNA01889	651609	2025515	1373907	53525718	1
WT-RNA01890	653662	653861	200	840	1
WT-RNA01891	653828	2024220	1370393	32229429	1
WT-RNA01892	653838	1865752	1211915	4729138	1
WT-RNA01893	653960	654013	54	660	1
WT-RNA01894	653986	654180	195	1298	1
WT-RNA01895	654193	654309	117	801	1
WT-RNA01896	654413	654502	90	1277	1
WT-RNA01897	654433	654640	208	2493	1
WT-RNA01898	654469	654546	78	1369	1
WT-RNA01899	654504	2022901	1368398	6000154	1
WT-RNA01900	654574	654708	135	1846	1
WT-RNA01901	654581	654664	84	1512	1
WT-RNA01902	654585	654638	54	1117	1
WT-RNA01903	654627	654801	175	1860	1
WT-RNA01904	654633	655096	464	3029	1
WT-RNA01905	654661	654735	75	1182	1
WT-RNA01906	654686	2027549	1372864	88122260	1
WT-RNA01907	654789	654878	90	947	1
WT-RNA01908	654844	2025688	1370845	56649521	1
WT-RNA01909	654953	655033	81	423	1
WT-RNA01910	656182	656408	227	326	1
WT-RNA01911	656728	656803	76	148	1
WT-RNA01912	657157	657281	125	273	1
WT-RNA01913	657234	657288	55	159	1
WT-RNA01914	659537	659696	160	82	1
WT-RNA01915	659700	2026178	1366479	65482532	1
WT-RNA01916	660625	2026476	1365852	72429246	1
WT-RNA01917	663674	663788	115	158	1
WT-RNA01918	664200	664264	65	49	2
WT-RNA01919	665014	665102	89	112	1
WT-RNA01920	665435	665488	54	56	1
WT-RNA01921	665854	665921	68	53	1
WT-RNA01922	666472	666524	53	154	1
WT-RNA01923	666475	666562	88	153	1
WT-RNA01924	671410	671519	110	5	1
WT-RNA01925	673156	673269	114	123	1
WT-RNA01926	674496	674618	123	48	1
WT-RNA01927	675115	675180	66	444	1
WT-RNA01928	675345	675402	58	737	2
WT-RNA01929	677244	677449	206	142	1
WT-RNA01930	677380	677502	123	142	1
WT-RNA01931	677638	677700	63	132	1
WT-RNA01932	678205	678359	155	668	1
WT-RNA01933	678305	678358	54	324	1
WT-RNA01934	678521	678664	144	679	1
WT-RNA01935	678606	678743	138	625	1
WT-RNA01936	679969	2022770	1342802	5227318	1
WT-RNA01937	680647	680735	89	872	1
WT-RNA01938	680971	681045	75	1884	1
WT-RNA01939	680989	681085	97	2182	1
WT-RNA01940	681134	681202	69	2044	1
WT-RNA01941	681137	2024639	1343503	33690035	1
WT-RNA01942	681410	681542	133	1520	1
WT-RNA01943	681589	681656	68	675	1
WT-RNA01944	682465	682524	60	99	1
WT-RNA01945	686606	686722	117	157	2
WT-RNA01946	686979	687147	169	353	1
WT-RNA01947	688658	688744	87	290	1
WT-RNA01948	689335	689431	97	227	1
WT-RNA01949	689804	689914	111	556	1
WT-RNA01950	689805	689858	54	436	1
WT-RNA01951	689815	689977	163	732	1
WT-RNA01952	690391	690518	128	385	1
WT-RNA01953	690610	690762	153	708	1
WT-RNA01954	690952	691015	64	436	1
WT-RNA01955	691050	691173	124	797	1
WT-RNA01956	691182	691370	189	891	1
WT-RNA01957	693001	693075	75	195	1
WT-RNA01958	693571	693663	93	204	1
WT-RNA01959	693593	693799	207	290	1
WT-RNA01960	694371	694606	236	378	1
WT-RNA01961	694830	694938	109	130	2
WT-RNA01962	695269	695406	138	286	1
WT-RNA01963	695487	695594	108	379	1
WT-RNA01964	695542	2023849	1328308	23582599	1
WT-RNA01965	695776	695870	95	301	1
WT-RNA01966	695948	696079	132	367	1
WT-RNA01967	696173	696277	105	634	1
WT-RNA01968	696248	2026690	1330443	74406558	1
WT-RNA01969	696613	696744	132	674	1
WT-RNA01970	696614	696764	151	716	1
WT-RNA01971	696803	696871	69	417	1
WT-RNA01972	696869	696922	54	508	1
WT-RNA01973	697376	697453	78	926	2
WT-RNA01974	697782	697908	127	1336	1
WT-RNA01975	697794	697919	126	1429	1
WT-RNA01976	697854	697918	65	420	1
WT-RNA01977	698002	698104	103	1011	2
WT-RNA01978	698981	699076	96	587	1
WT-RNA01979	699088	699191	104	742	1
WT-RNA01980	699149	699211	63	524	1
WT-RNA01981	699160	699297	138	729	1
WT-RNA01982	699452	699524	73	304	1
WT-RNA01983	699827	699978	152	567	1
WT-RNA01984	699850	699972	123	501	1
WT-RNA01985	699926	700078	153	724	1
WT-RNA01986	700016	700120	105	546	1
WT-RNA01987	700025	700090	66	841	2
WT-RNA01988	700030	700101	72	443	1
WT-RNA01989	700065	700179	115	596	1
WT-RNA01990	700124	700178	55	335	1
WT-RNA01991	700406	700545	140	384	1
WT-RNA01992	700747	701256	510	2327	1
WT-RNA01993	700870	700960	91	579	1
WT-RNA01994	701125	701295	171	1070	1
WT-RNA01995	701249	701391	143	821	1
WT-RNA01996	701362	1323763	622402	2552544	1
WT-RNA01997	703541	703652	112	154	1
WT-RNA01998	705033	705107	75	105	1
WT-RNA01999	705408	705495	88	197	1
[truncated: 10,633 more rows]

## Sheet: (ii) WT - Table 2
index	Circular junction position		length	Number of aligned reads	Number of junction reads
WT-RNA00177	51411	51477	67	535	493
WT-RNA00806	316127	316189	63	611	113
WT-RNA01666	609886	609963	78	35776	116
WT-RNA02199	780420	780530	111	47473	154
WT-RNA02413	781500	781571	72	80394	276
WT-RNA02665	832364	832425	62	340	123
WT-RNA03082	963853	963919	67	252	343
WT-RNA03891	1226838	1226899	62	359	202
WT-RNA03893	1226948	1227017	70	226	145
WT-RNA04205	1257020	1257081	62	42	135
WT-RNA04789	1371728	1371790	63	540	258
WT-RNA05123	1446209	1446268	60	224	376
WT-RNA06664	1894519	1894579	61	1092	857
WT-RNA06794	1945728	1945789	62	3195	1415
WT-RNA06955	2022801	2024382	1582	55116954	6836
WT-RNA07412	2023158	2023466	309	12770675	174
WT-RNA07414	2023159	2023475	317	12889121	104
WT-RNA07417	2023159	2023318	160	7126317	169
WT-RNA07421	2023159	2023278	120	6417812	152
WT-RNA07452	2023166	2023285	120	5768261	2630
WT-RNA07454	2023167	2023474	308	12090293	134
WT-RNA07812	2023452	2027135	3684	136918716	122
WT-RNA07914	2023498	2023756	259	12632108	179
WT-RNA07917	2023499	2023701	203	9754992	351
WT-RNA07961	2023523	2023703	181	9870768	214
WT-RNA07984	2023530	2023977	448	21335943	120
WT-RNA08005	2023538	2023702	165	9260498	103
WT-RNA08080	2023552	2026934	3383	125348723	203
WT-RNA08081	2023552	2026697	3146	118499066	162
WT-RNA08103	2023556	2024932	1377	48956704	260
WT-RNA08105	2023557	2023759	203	11971838	164
WT-RNA08113	2023558	2023802	245	13468329	401
WT-RNA08140	2023563	2023757	195	11876802	160
WT-RNA08153	2023566	2023810	245	13825929	127
WT-RNA08158	2023567	2024010	444	24571846	103
WT-RNA08170	2023571	2023701	131	8280188	119
WT-RNA08172	2023571	2023756	186	11153523	193
WT-RNA08209	2023583	2023756	174	9691147	430
WT-RNA08210	2023584	2023703	120	7098270	366
WT-RNA08212	2023584	2023826	243	11862204	178
WT-RNA08236	2023590	2023763	174	9460358	625
WT-RNA08262	2023605	2023759	155	8817184	211
WT-RNA08306	2023629	2023731	103	6352766	490
WT-RNA08311	2023633	2023759	127	7018227	284
WT-RNA08544	2023722	2023831	110	6100535	1047
WT-RNA08585	2023740	2023855	116	6176716	115
WT-RNA08608	2023743	2023804	62	4820276	1864
WT-RNA08742	2023811	2024009	199	12386230	680
WT-RNA08810	2023861	2027312	3452	125349743	155
WT-RNA08877	2023890	2025088	1199	43890429	467
WT-RNA09046	2023989	2024667	679	16535784	159
WT-RNA09134	2024018	2025830	1813	67816270	434
WT-RNA09137	2024020	2024164	145	11146908	248
WT-RNA09140	2024021	2024156	136	9233778	304
WT-RNA09163	2024029	2024155	127	8788234	981
WT-RNA09174	2024030	2025841	1812	67985984	234
WT-RNA09239	2024065	2027623	3559	117751667	209
WT-RNA09345	2024170	2024784	615	13589236	131
WT-RNA09375	2024199	2025059	861	26973194	272
WT-RNA09452	2024584	2027631	3048	109488453	282955
WT-RNA09465	2024592	2027592	3001	109486468	376
WT-RNA09480	2024595	2027605	3011	109486015	42016
WT-RNA09495	2024597	2027539	2943	108589840	141
WT-RNA09775	2024719	2026740	2022	82784315	111
WT-RNA09834	2024753	2025116	364	23048109	358
WT-RNA09850	2024756	2025691	936	43782857	114
WT-RNA09863	2024760	2024935	176	9789322	191
WT-RNA10115	2024906	2024993	88	5972964	136
WT-RNA10226	2024955	2026247	1293	54156653	129
WT-RNA10267	2024977	2025062	86	8035933	146
WT-RNA10287	2024992	2025059	68	7637492	129
WT-RNA10289	2024994	2025753	760	36729906	184
WT-RNA10350	2025032	2025151	120	11344995	1095
WT-RNA10378	2025039	2025158	120	11235179	730
WT-RNA10381	2025039	2025142	104	10889574	205
WT-RNA10403	2025046	2027599	2554	90807840	299
WT-RNA10406	2025049	2025129	81	10047046	401
WT-RNA10438	2025071	2025147	77	8477408	1353
WT-RNA10472	2025091	2027110	2020	77070367	302
WT-RNA10476	2025093	2025187	95	8109195	869
WT-RNA10519	2025116	2025213	98	10064638	303
WT-RNA10524	2025117	2025286	170	13164310	115
WT-RNA10529	2025117	2025252	136	11662147	121
WT-RNA10548	2025123	2025492	370	17877036	244
WT-RNA10630	2025170	2026524	1355	51162748	137
WT-RNA10648	2025184	2025298	115	8114421	149
WT-RNA10656	2025189	2025310	122	8329360	125
WT-RNA10731	2025228	2025707	480	19758068	141
WT-RNA10802	2025288	2025347	60	2935956	114
WT-RNA10805	2025288	2025373	86	4312957	3526
WT-RNA10808	2025289	2025390	102	4690500	193
WT-RNA10844	2025315	2027576	2262	72931103	223
WT-RNA11149	2025563	2025777	215	10606796	469
WT-RNA11156	2025568	2025688	121	6029584	113
WT-RNA11194	2025617	2025753	137	7449273	301
WT-RNA11196	2025618	2025733	116	6751960	103
WT-RNA11198	2025626	2025739	114	6777783	285
WT-RNA11263	2025664	2026478	815	32032550	127
WT-RNA11265	2025666	2027550	1885	62745790	142
WT-RNA11355	2025731	2026201	471	18385824	119
WT-RNA11428	2025809	2025984	176	8578728	178
WT-RNA11552	2025929	2027550	1622	51798760	612
WT-RNA11589	2025959	2027040	1082	39548339	184
WT-RNA11590	2025959	2026080	122	5973854	144
WT-RNA11591	2025959	2026053	95	5240725	645
WT-RNA11593	2025959	2026017	59	4616378	109
WT-RNA11595	2025963	2026065	103	5648279	162
WT-RNA11902	2026294	2026703	410	16592088	122
WT-RNA12032	2026449	2026561	113	5050486	305
WT-RNA12108	2026625	2026821	197	7935775	121
WT-RNA12161	2026703	2026818	116	5090210	161
WT-RNA12287	2026899	2027062	164	8206412	106
WT-RNA12315	2026940	2027550	611	18079121	151

## Sheet: (i) tk1545KO - Table 1
index	Circular junction position		length	Number of aligned reads	Number of junction reads
TK1545-KO-RNA0001	1	2088737	2088737	102609991	10
TK1545-KO-RNA0002	170	229	60	82	2
TK1545-KO-RNA0003	921	1091	171	140	1
TK1545-KO-RNA0004	2041	2102	62	87	1
TK1545-KO-RNA0005	2998	3197	200	231	1
TK1545-KO-RNA0006	3859	4006	148	120	1
TK1545-KO-RNA0007	3999	4084	86	79	1
TK1545-KO-RNA0008	5664	5729	66	26	1
TK1545-KO-RNA0009	5787	5938	152	26	1
TK1545-KO-RNA0010	7145	7261	117	101	1
TK1545-KO-RNA0011	7671	7724	54	86	2
TK1545-KO-RNA0012	11956	2027140	2015185	48389833	1
TK1545-KO-RNA0013	12337	12573	237	5645	1
TK1545-KO-RNA0014	12337	2027547	2015211	51240160	1
TK1545-KO-RNA0015	12355	12564	210	5126	1
TK1545-KO-RNA0016	12398	12469	72	2482	1
TK1545-KO-RNA0017	12426	12615	190	10677	2
TK1545-KO-RNA0018	12429	12597	169	4647	1
TK1545-KO-RNA0019	12433	12570	138	4476	1
TK1545-KO-RNA0020	12504	1327649	1315146	2741556	1
TK1545-KO-RNA0021	12541	12841	301	9120	1
TK1545-KO-RNA0022	12569	12712	144	5441	1
TK1545-KO-RNA0023	12622	12781	160	4409	1
TK1545-KO-RNA0024	12634	12702	69	5850	9
TK1545-KO-RNA0025	12636	12741	106	7215	3
TK1545-KO-RNA0026	12638	13088	451	11818	1
TK1545-KO-RNA0027	12641	13043	403	11733	1
TK1545-KO-RNA0028	12642	12716	75	2787	1
TK1545-KO-RNA0029	12643	12741	99	3827	1
TK1545-KO-RNA0030	12644	12751	108	7567	2
TK1545-KO-RNA0031	12644	12705	62	5614	11
TK1545-KO-RNA0032	12646	12820	175	4889	1
TK1545-KO-RNA0033	12648	1576057	1563410	3366493	1
TK1545-KO-RNA0034	12653	2026948	2014296	46508962	1
TK1545-KO-RNA0035	12654	12820	167	4705	1
TK1545-KO-RNA0036	12711	12986	276	6940	1
TK1545-KO-RNA0037	12733	12822	90	3168	1
TK1545-KO-RNA0038	12764	2023823	2011060	29515818	1
TK1545-KO-RNA0039	12864	12977	114	3777	1
TK1545-KO-RNA0040	12899	13207	309	10606	1
TK1545-KO-RNA0041	13006	13110	105	4392	1
TK1545-KO-RNA0042	13010	13138	129	10109	1
TK1545-KO-RNA0043	13015	2025067	2012053	26777155	1
TK1545-KO-RNA0044	13084	13136	53	6425	4
TK1545-KO-RNA0045	13092	13229	138	5949	1
TK1545-KO-RNA0046	13127	13270	144	5973	1
TK1545-KO-RNA0047	13130	13234	105	10121	10
TK1545-KO-RNA0048	13230	13356	127	4031	1
TK1545-KO-RNA0049	13236	1542228	1528993	3281023	1
TK1545-KO-RNA0050	13247	13388	142	3789	1
TK1545-KO-RNA0051	13254	2027267	2014014	50065099	1
TK1545-KO-RNA0052	13358	13483	126	1674	2
TK1545-KO-RNA0053	14318	14547	230	235	1
TK1545-KO-RNA0054	16380	16500	121	248	1
TK1545-KO-RNA0055	16615	16702	88	216	1
TK1545-KO-RNA0056	16637	2025259	2008623	30099889	1
TK1545-KO-RNA0057	17209	17328	120	99	1
TK1545-KO-RNA0058	18257	18553	297	309	1
TK1545-KO-RNA0059	19113	19175	63	108	1
TK1545-KO-RNA0060	21745	21819	75	158	1
TK1545-KO-RNA0061	22189	22316	128	193	1
TK1545-KO-RNA0062	23450	23553	104	392	1
TK1545-KO-RNA0063	23479	23542	64	522	1
TK1545-KO-RNA0064	27660	27789	130	250	1
TK1545-KO-RNA0065	27876	27956	81	432	3
TK1545-KO-RNA0066	28055	28225	171	418	1
TK1545-KO-RNA0067	28059	28174	116	290	1
TK1545-KO-RNA0068	28199	28341	143	314	1
TK1545-KO-RNA0069	28237	28329	93	239	1
TK1545-KO-RNA0070	28299	28436	138	220	2
TK1545-KO-RNA0071	28564	28624	61	155	1
TK1545-KO-RNA0072	28664	28736	73	170	1
TK1545-KO-RNA0073	29177	29306	130	231	1
TK1545-KO-RNA0074	30086	30198	113	187	1
TK1545-KO-RNA0075	30876	2023906	1993031	16192360	1
TK1545-KO-RNA0076	31135	31326	192	508	1
TK1545-KO-RNA0077	31299	31368	70	199	1
TK1545-KO-RNA0078	32512	32674	163	925	1
TK1545-KO-RNA0079	32639	32765	127	784	1
TK1545-KO-RNA0080	32738	32809	72	542	1
TK1545-KO-RNA0081	32823	32882	60	524	1
TK1545-KO-RNA0082	32883	33068	186	1476	1
TK1545-KO-RNA0083	32926	33033	108	1950	2
TK1545-KO-RNA0084	32933	33040	108	1855	3
TK1545-KO-RNA0085	33200	33257	58	578	1
TK1545-KO-RNA0086	33210	1768138	1734929	3683844	1
TK1545-KO-RNA0087	33280	33466	187	1074	1
TK1545-KO-RNA0088	33804	34202	399	2542	1
TK1545-KO-RNA0089	34138	34283	146	1311	1
TK1545-KO-RNA0090	34248	34369	122	2188	1
TK1545-KO-RNA0091	34522	2026482	1991961	41952213	1
TK1545-KO-RNA0092	34542	2026356	1991815	40941293	1
TK1545-KO-RNA0093	34853	35009	157	1465	1
TK1545-KO-RNA0094	34870	2023800	1988931	14496320	1
TK1545-KO-RNA0095	35524	35594	71	739	1
TK1545-KO-RNA0096	35660	35722	63	626	1
TK1545-KO-RNA0097	35748	35855	108	719	1
TK1545-KO-RNA0098	35962	36109	148	582	1
TK1545-KO-RNA0099	36033	36109	77	382	1
TK1545-KO-RNA0100	36070	36126	57	319	2
TK1545-KO-RNA0101	36072	36739	668	1894	1
TK1545-KO-RNA0102	36079	36135	57	347	1
TK1545-KO-RNA0103	36142	36333	192	847	1
TK1545-KO-RNA0104	36486	36699	214	452	1
TK1545-KO-RNA0105	36535	36702	168	407	1
TK1545-KO-RNA0106	36734	36790	57	260	1
TK1545-KO-RNA0107	36766	36831	66	545	3
TK1545-KO-RNA0108	37155	2023568	1986414	11606630	1
TK1545-KO-RNA0109	37555	37629	75	617	2
TK1545-KO-RNA0110	37992	38048	57	273	1
TK1545-KO-RNA0111	38287	38474	188	538	1
TK1545-KO-RNA0112	38312	38446	135	480	1
TK1545-KO-RNA0113	38328	38486	159	503	1
TK1545-KO-RNA0114	38484	38675	192	393	1
TK1545-KO-RNA0115	38488	38550	63	391	1
TK1545-KO-RNA0116	38489	38653	165	707	1
TK1545-KO-RNA0117	38660	38752	93	259	1
TK1545-KO-RNA0118	38742	38801	60	196	1
TK1545-KO-RNA0119	39174	39274	101	335	1
TK1545-KO-RNA0120	41340	41476	137	98	1
TK1545-KO-RNA0121	43658	43786	129	55	1
TK1545-KO-RNA0122	43734	43787	54	27	1
TK1545-KO-RNA0123	47846	47971	126	143	1
TK1545-KO-RNA0124	50323	50401	79	1241	1
TK1545-KO-RNA0125	50335	50391	57	1151	1
TK1545-KO-RNA0126	50344	50399	56	820	1
TK1545-KO-RNA0127	50910	50993	84	235	1
TK1545-KO-RNA0128	51411	51477	67	194	1
TK1545-KO-RNA0129	52033	52153	121	176	1
TK1545-KO-RNA0130	53380	53522	143	253	1
TK1545-KO-RNA0131	54480	54596	117	92	1
TK1545-KO-RNA0132	55960	56043	84	48	1
TK1545-KO-RNA0133	56070	56190	121	87	1
TK1545-KO-RNA0134	58264	1665741	1607478	3567245	1
TK1545-KO-RNA0135	58402	58533	132	2155	1
TK1545-KO-RNA0136	58490	58560	71	1956	1
TK1545-KO-RNA0137	58546	58755	210	3701	1
TK1545-KO-RNA0138	58614	58666	53	2825	4
TK1545-KO-RNA0139	59491	59755	265	24	1
TK1545-KO-RNA0140	60823	60993	171	347	1
TK1545-KO-RNA0141	61600	61727	128	204	1
TK1545-KO-RNA0142	76940	77053	114	89	1
TK1545-KO-RNA0143	78000	78071	72	25	1
TK1545-KO-RNA0144	87737	1078005	990269	1941136	1
TK1545-KO-RNA0145	90051	90261	211	1913	1
TK1545-KO-RNA0146	90189	2023570	1933382	11591556	1
TK1545-KO-RNA0147	90263	2023759	1933497	14046060	1
TK1545-KO-RNA0148	90266	2026537	1936272	42705111	1
TK1545-KO-RNA0149	90462	2023494	1933033	10572737	1
TK1545-KO-RNA0150	90467	90538	72	1021	1
TK1545-KO-RNA0151	93121	2025249	1932129	29526975	1
TK1545-KO-RNA0152	93275	93357	83	84	1
TK1545-KO-RNA0153	94083	94343	261	150	1
TK1545-KO-RNA0154	97156	97230	75	184	1
TK1545-KO-RNA0155	97427	97522	96	131	1
TK1545-KO-RNA0156	98175	2024774	1926600	22430780	1
TK1545-KO-RNA0157	98315	98398	84	133	1
TK1545-KO-RNA0158	100989	101107	119	547	1
TK1545-KO-RNA0159	101075	101192	118	574	1
TK1545-KO-RNA0160	101108	101267	160	557	1
TK1545-KO-RNA0161	101284	101402	119	332	1
TK1545-KO-RNA0162	101321	101485	165	396	1
TK1545-KO-RNA0163	101488	101625	138	305	1
TK1545-KO-RNA0164	101798	101888	91	239	1
TK1545-KO-RNA0165	101948	2023795	1921848	14216915	1
TK1545-KO-RNA0166	104121	104189	69	316	1
TK1545-KO-RNA0167	104469	104554	86	124	1
TK1545-KO-RNA0168	105161	105300	140	235	1
TK1545-KO-RNA0169	105507	105566	60	129	1
TK1545-KO-RNA0170	105595	2023681	1918087	12973662	1
TK1545-KO-RNA0171	106380	1479195	1372816	3066884	1
TK1545-KO-RNA0172	108449	108555	107	1280	1
TK1545-KO-RNA0173	108465	2024795	1916331	22485113	1
TK1545-KO-RNA0174	108484	108619	136	2237	1
TK1545-KO-RNA0175	108691	109009	319	6031	1
TK1545-KO-RNA0176	108742	109203	462	8488	1
TK1545-KO-RNA0177	108871	263073	154203	235553	1
TK1545-KO-RNA0178	108929	108985	57	1516	1
TK1545-KO-RNA0179	108936	108992	57	1462	1
TK1545-KO-RNA0180	109003	109190	188	9527	2
TK1545-KO-RNA0181	109080	109194	115	3077	1
TK1545-KO-RNA0182	109201	109312	112	6291	13
TK1545-KO-RNA0183	109284	109423	140	3400	1
TK1545-KO-RNA0184	109354	109425	72	1879	1
TK1545-KO-RNA0185	109404	109476	73	1855	1
TK1545-KO-RNA0186	109462	109524	63	3930	1
TK1545-KO-RNA0187	109532	109662	131	3713	1
TK1545-KO-RNA0188	109541	2026791	1917251	44559869	1
TK1545-KO-RNA0189	109640	109729	90	2348	1
TK1545-KO-RNA0190	109692	109751	60	2039	1
TK1545-KO-RNA0191	109766	109861	96	1934	1
TK1545-KO-RNA0192	109863	110109	247	4238	1
TK1545-KO-RNA0193	109928	110027	100	4410	4
TK1545-KO-RNA0194	109930	110019	90	1946	1
TK1545-KO-RNA0195	109937	110027	91	4326	1
TK1545-KO-RNA0196	109998	110105	108	2342	1
TK1545-KO-RNA0197	110216	110335	120	4933	2
TK1545-KO-RNA0198	110247	110396	150	2502	1
TK1545-KO-RNA0199	110323	110468	146	3005	2
TK1545-KO-RNA0200	110384	110463	80	1963	1
TK1545-KO-RNA0201	110436	110710	275	5510	1
TK1545-KO-RNA0202	110803	110880	78	1693	1
TK1545-KO-RNA0203	110882	110976	95	1850	1
TK1545-KO-RNA0204	111003	111086	84	1622	1
TK1545-KO-RNA0205	111435	2027549	1916115	51151898	1
TK1545-KO-RNA0206	111554	111759	206	1849	1
TK1545-KO-RNA0207	111562	111655	94	1126	1
TK1545-KO-RNA0208	112082	112760	679	6041	1
TK1545-KO-RNA0209	112309	112374	66	1291	1
TK1545-KO-RNA0210	112313	112438	126	2087	1
TK1545-KO-RNA0211	112342	112504	163	2517	1
TK1545-KO-RNA0212	112344	112488	145	2335	1
TK1545-KO-RNA0213	112504	112688	185	2045	2
TK1545-KO-RNA0214	112525	112860	336	3573	1
TK1545-KO-RNA0215	112556	112618	63	1088	1
TK1545-KO-RNA0216	112593	112717	125	1654	1
TK1545-KO-RNA0217	112686	112997	312	3144	1
TK1545-KO-RNA0218	112704	368488	255785	336641	1
TK1545-KO-RNA0219	112792	112866	75	2384	1
TK1545-KO-RNA0220	112837	112913	77	2216	1
TK1545-KO-RNA0221	114726	114865	140	469	1
TK1545-KO-RNA0222	115069	115310	242	555	1
TK1545-KO-RNA0223	115193	115283	91	233	1
TK1545-KO-RNA0224	115478	115558	81	131	1
TK1545-KO-RNA0225	116390	116481	92	193	1
TK1545-KO-RNA0226	116480	116611	132	609	1
TK1545-KO-RNA0227	116499	116552	54	566	2
TK1545-KO-RNA0228	116799	116859	61	272	1
TK1545-KO-RNA0229	118889	119239	351	577	1
TK1545-KO-RNA0230	118901	119012	112	384	1
TK1545-KO-RNA0231	118931	119012	82	167	2
TK1545-KO-RNA0232	119281	119393	113	289	1
TK1545-KO-RNA0233	119596	119661	66	209	1
TK1545-KO-RNA0234	119605	119666	62	210	1
TK1545-KO-RNA0235	119743	119802	60	227	1
TK1545-KO-RNA0236	119757	119861	105	300	1
TK1545-KO-RNA0237	119851	119940	90	166	1
TK1545-KO-RNA0238	120316	120451	136	113	1
TK1545-KO-RNA0239	120537	120698	162	805	1
TK1545-KO-RNA0240	120700	120951	252	1133	1
TK1545-KO-RNA0241	120894	121009	116	303	1
TK1545-KO-RNA0242	121445	2025861	1904417	35888434	1
TK1545-KO-RNA0243	121446	121635	190	2501	1
TK1545-KO-RNA0244	121489	121623	135	4276	1
TK1545-KO-RNA0245	121811	121897	87	979	1
TK1545-KO-RNA0246	121820	121889	70	894	1
TK1545-KO-RNA0247	122428	122543	116	91	1
TK1545-KO-RNA0248	122540	122632	93	69	1
TK1545-KO-RNA0249	122549	122641	93	76	1
TK1545-KO-RNA0250	122998	1684910	1561913	3478229	1
TK1545-KO-RNA0251	123325	123395	71	139	1
TK1545-KO-RNA0252	123494	123588	95	388	1
TK1545-KO-RNA0253	125343	125501	159	255	1
TK1545-KO-RNA0254	127660	2026429	1898770	41914161	1
TK1545-KO-RNA0255	127688	2023720	1896033	13393911	1
TK1545-KO-RNA0256	127779	127835	57	118	1
TK1545-KO-RNA0257	127784	127890	107	186	2
TK1545-KO-RNA0258	128000	128201	202	285	1
TK1545-KO-RNA0259	129358	129456	99	126	1
TK1545-KO-RNA0260	134225	134280	56	110	1
TK1545-KO-RNA0261	135212	135271	60	51	1
TK1545-KO-RNA0262	135429	135585	157	139	1
TK1545-KO-RNA0263	136948	137033	86	310	1
TK1545-KO-RNA0264	137715	137768	54	104	1
TK1545-KO-RNA0265	138582	138675	94	2409	2
TK1545-KO-RNA0266	138716	138768	53	852	1
TK1545-KO-RNA0267	141566	141656	91	325	1
TK1545-KO-RNA0268	141840	141934	95	139	1
TK1545-KO-RNA0269	143153	143217	65	97	1
TK1545-KO-RNA0270	143204	143262	59	134	1
TK1545-KO-RNA0271	143353	2026434	1883082	41552580	1
TK1545-KO-RNA0272	144312	144401	90	130	1
TK1545-KO-RNA0273	145932	2026026	1880095	37147382	1
TK1545-KO-RNA0274	146739	2023711	1876973	13433018	1
TK1545-KO-RNA0275	149256	149334	79	293	1
TK1545-KO-RNA0276	149270	149366	97	484	1
TK1545-KO-RNA0277	149512	149571	60	569	1
TK1545-KO-RNA0278	149703	149958	256	1805	1
TK1545-KO-RNA0279	150747	150875	129	2125	3
TK1545-KO-RNA0280	151012	151780	769	3604	1
TK1545-KO-RNA0281	151228	151305	78	1340	3
TK1545-KO-RNA0282	151347	151450	104	866	1
TK1545-KO-RNA0283	151523	151641	119	616	1
TK1545-KO-RNA0284	151674	151815	142	716	1
TK1545-KO-RNA0285	153485	153581	97	857	2
TK1545-KO-RNA0286	153523	153600	78	830	1
TK1545-KO-RNA0287	153608	153691	84	421	1
TK1545-KO-RNA0288	155412	155489	78	62	1
TK1545-KO-RNA0289	155638	155706	69	33	1
TK1545-KO-RNA0290	156382	156434	53	722	1
TK1545-KO-RNA0291	156383	156466	84	888	1
TK1545-KO-RNA0292	156660	940201	783542	1544192	1
TK1545-KO-RNA0293	156664	156793	130	2065	1
TK1545-KO-RNA0294	156879	914195	757317	1503733	1
TK1545-KO-RNA0295	156957	157049	93	977	1
TK1545-KO-RNA0296	157143	157267	125	889	1
TK1545-KO-RNA0297	158027	158180	154	939	3
TK1545-KO-RNA0298	158072	158128	57	270	2
TK1545-KO-RNA0299	159055	2026132	1867078	37915873	1
TK1545-KO-RNA0300	159718	159806	89	169	1
TK1545-KO-RNA0301	160629	160727	99	114	1
TK1545-KO-RNA0302	160639	160750	112	141	1
TK1545-KO-RNA0303	161304	161414	111	97	1
TK1545-KO-RNA0304	161902	162024	123	164	1
TK1545-KO-RNA0305	163125	163280	156	216	1
TK1545-KO-RNA0306	163977	164039	63	25	1
TK1545-KO-RNA0307	169191	169330	140	77	1
TK1545-KO-RNA0308	169885	169978	94	173	1
TK1545-KO-RNA0309	172059	172119	61	13	1
TK1545-KO-RNA0310	174010	2026293	1852284	39500049	1
TK1545-KO-RNA0311	175434	175501	68	72	1
TK1545-KO-RNA0312	175989	176145	157	19	1
TK1545-KO-RNA0313	176740	176802	63	19	1
TK1545-KO-RNA0314	181748	181840	93	7	1
TK1545-KO-RNA0315	185271	185431	161	244	1
TK1545-KO-RNA0316	185840	186070	231	1339	1
TK1545-KO-RNA0317	185930	186076	147	1120	1
TK1545-KO-RNA0318	185953	186062	110	1011	1
TK1545-KO-RNA0319	186020	186253	234	1924	1
TK1545-KO-RNA0320	186170	186331	162	1253	1
TK1545-KO-RNA0321	186404	186472	69	1541	2
TK1545-KO-RNA0322	186505	186579	75	1415	2
TK1545-KO-RNA0323	186749	186802	54	576	1
TK1545-KO-RNA0324	186884	186967	84	677	1
TK1545-KO-RNA0325	188437	188559	123	404	2
TK1545-KO-RNA0326	188862	189127	266	496	1
TK1545-KO-RNA0327	188942	189312	371	536	1
TK1545-KO-RNA0328	192526	192650	125	127	1
TK1545-KO-RNA0329	193004	193157	154	515	2
TK1545-KO-RNA0330	194854	195051	198	129	1
TK1545-KO-RNA0331	195988	196065	78	73	1
TK1545-KO-RNA0332	197031	197098	68	87	2
TK1545-KO-RNA0333	197414	197602	189	130	1
TK1545-KO-RNA0334	200531	200612	82	29	1
TK1545-KO-RNA0335	201786	201950	165	358	1
TK1545-KO-RNA0336	201897	2026478	1824582	42028790	1
TK1545-KO-RNA0337	202007	202101	95	533	1
TK1545-KO-RNA0338	203007	203075	69	83	1
TK1545-KO-RNA0339	222537	222933	397	221	1
TK1545-KO-RNA0340	223644	223703	60	131	2
TK1545-KO-RNA0341	223753	223920	168	143	1
TK1545-KO-RNA0342	224916	225035	120	565	2
TK1545-KO-RNA0343	225560	225705	146	441	1
TK1545-KO-RNA0344	225827	226078	252	820	1
TK1545-KO-RNA0345	227206	227343	138	542	1
TK1545-KO-RNA0346	227474	2025288	1797815	29794278	1
TK1545-KO-RNA0347	227679	227732	54	929	1
TK1545-KO-RNA0348	228012	228148	137	315	1
TK1545-KO-RNA0349	228144	228253	110	521	2
TK1545-KO-RNA0350	228397	1243398	1015002	2140354	1
TK1545-KO-RNA0351	229269	229325	57	12	1
TK1545-KO-RNA0352	237993	238208	216	531	1
TK1545-KO-RNA0353	238001	1339320	1101320	2565890	1
TK1545-KO-RNA0354	241186	241317	132	18	1
TK1545-KO-RNA0355	244822	244904	83	33	1
TK1545-KO-RNA0356	247336	247626	291	825	1
TK1545-KO-RNA0357	247882	247938	57	196	2
TK1545-KO-RNA0358	248044	248136	93	187	1
TK1545-KO-RNA0359	249049	249105	57	56	1
TK1545-KO-RNA0360	249248	2025346	1776099	30188751	1
TK1545-KO-RNA0361	251404	451252	199849	696002	2
TK1545-KO-RNA0362	251436	251521	86	861	1
TK1545-KO-RNA0363	254691	254768	78	27	1
TK1545-KO-RNA0364	257687	257764	78	455	1
TK1545-KO-RNA0365	257845	258116	272	1077	1
TK1545-KO-RNA0366	258293	258370	78	839	1
TK1545-KO-RNA0367	258614	258692	79	345	1
TK1545-KO-RNA0368	258700	258786	87	523	1
TK1545-KO-RNA0369	259363	2027550	1768188	51027896	2
TK1545-KO-RNA0370	259364	2023091	1763728	6155257	2
TK1545-KO-RNA0371	259364	2027470	1768107	49760014	1
TK1545-KO-RNA0372	259368	259663	296	72382	5
TK1545-KO-RNA0373	259370	259531	162	29377	1
TK1545-KO-RNA0374	259378	259466	89	46191	2
TK1545-KO-RNA0375	259410	1613222	1353813	3273381	1
TK1545-KO-RNA0376	259421	2023571	1764151	11359723	1
TK1545-KO-RNA0377	259430	2026022	1766593	37029860	1
TK1545-KO-RNA0378	259431	2025328	1765898	30085498	1
TK1545-KO-RNA0379	259437	259662	226	25982	1
TK1545-KO-RNA0380	259438	259638	201	52176	1
TK1545-KO-RNA0381	259452	259623	172	46890	4
TK1545-KO-RNA0382	259461	259568	108	16519	1
TK1545-KO-RNA0383	259468	259637	170	19628	1
TK1545-KO-RNA0384	259497	2026479	1766983	41618527	1
TK1545-KO-RNA0385	259551	2025529	1765979	32166598	1
TK1545-KO-RNA0386	259558	2026788	1767231	44922949	1
TK1545-KO-RNA0387	259558	2024218	1764661	19043081	1
TK1545-KO-RNA0388	259558	2024885	1765328	23620235	1
TK1545-KO-RNA0389	259559	2026147	1766589	76450133	2
TK1545-KO-RNA0390	259561	2026988	1767428	47100031	1
TK1545-KO-RNA0391	259561	2025549	1765989	32389633	1
TK1545-KO-RNA0392	259562	2026795	1767234	89350640	2
TK1545-KO-RNA0393	259563	2025977	1766415	73896460	1
TK1545-KO-RNA0394	259564	2023193	1763630	15769919	1
TK1545-KO-RNA0395	259565	2025161	1765597	28338254	1
TK1545-KO-RNA0396	259567	2026154	1766588	38508147	1
TK1545-KO-RNA0397	259567	2026427	1766861	41777828	1
TK1545-KO-RNA0398	259571	259636	66	15276	17
TK1545-KO-RNA0399	259571	2026803	1767233	89368426	6
TK1545-KO-RNA0400	259571	2022989	1763419	5184794	2
TK1545-KO-RNA0401	259574	2025139	1765566	28098420	1
TK1545-KO-RNA0402	259578	2026810	1767233	89420980	5
TK1545-KO-RNA0403	259583	2026918	1767336	91091838	1
TK1545-KO-RNA0404	259587	2025912	1766326	71834899	3
TK1545-KO-RNA0405	259591	2027625	1768035	101738898	1
TK1545-KO-RNA0406	259595	2023768	1764174	27675024	2
TK1545-KO-RNA0407	259606	2027015	1767410	46641906	1
TK1545-KO-RNA0408	259606	2023741	1764136	13596813	1
TK1545-KO-RNA0409	259615	2024626	1765012	19915155	1
TK1545-KO-RNA0410	259615	2024820	1765206	22474287	1
TK1545-KO-RNA0411	259624	2023766	1764143	13887995	1
TK1545-KO-RNA0412	259632	2027100	1767469	48456062	1
TK1545-KO-RNA0413	259632	2026131	1766500	37830453	1
TK1545-KO-RNA0414	262169	262246	78	2137	1
TK1545-KO-RNA0415	262205	262267	63	3791	2
TK1545-KO-RNA0416	262227	262292	66	4239	7
TK1545-KO-RNA0417	262243	262345	103	3236	1
TK1545-KO-RNA0418	262260	262442	183	6275	1
TK1545-KO-RNA0419	262302	262383	82	5795	2
TK1545-KO-RNA0420	262304	262620	317	9842	1
TK1545-KO-RNA0421	262332	262485	154	5652	1
TK1545-KO-RNA0422	262335	262428	94	8463	1
TK1545-KO-RNA0423	262350	262433	84	8055	22
TK1545-KO-RNA0424	262429	262598	170	6034	1
TK1545-KO-RNA0425	262512	262628	117	4130	1
TK1545-KO-RNA0426	262512	262701	190	7393	2
TK1545-KO-RNA0427	262580	262743	164	8625	1
TK1545-KO-RNA0428	262595	262702	108	5914	1
TK1545-KO-RNA0429	262613	262842	230	13484	1
TK1545-KO-RNA0430	262633	262716	84	11927	3
TK1545-KO-RNA0431	262640	262723	84	6545	1
TK1545-KO-RNA0432	262647	262699	53	4579	1
TK1545-KO-RNA0433	262679	262849	171	11498	1
TK1545-KO-RNA0434	262681	262872	192	12942	1
TK1545-KO-RNA0435	262686	262856	171	24100	2
TK1545-KO-RNA0436	262693	262861	169	11904	1
TK1545-KO-RNA0437	262693	262847	155	10657	2
TK1545-KO-RNA0438	262719	262901	183	12854	1
TK1545-KO-RNA0439	262729	262824	96	16254	3
TK1545-KO-RNA0440	262732	262854	123	19088	1
TK1545-KO-RNA0441	262741	262836	96	8196	1
TK1545-KO-RNA0442	262752	262847	96	8165	1
TK1545-KO-RNA0443	262790	262861	72	13909	1
TK1545-KO-RNA0444	262796	262873	78	14700	3
TK1545-KO-RNA0445	262817	262873	57	12213	2
TK1545-KO-RNA0446	262817	262909	93	7576	1
TK1545-KO-RNA0447	262820	2023762	1760943	13643818	1
TK1545-KO-RNA0448	262823	2027256	1764434	48956089	1
TK1545-KO-RNA0449	262837	1502622	1239786	2884762	1
TK1545-KO-RNA0450	262837	263001	165	10606	1
TK1545-KO-RNA0451	262846	262902	57	5917	1
TK1545-KO-RNA0452	262879	262941	63	5327	1
TK1545-KO-RNA0453	262909	263058	150	8769	1
TK1545-KO-RNA0454	262909	263009	101	13455	2
TK1545-KO-RNA0455	262917	263067	151	17910	2
TK1545-KO-RNA0456	262999	263235	237	12066	1
TK1545-KO-RNA0457	263005	263070	66	10897	1
TK1545-KO-RNA0458	263006	263182	177	9920	1
TK1545-KO-RNA0459	263006	263161	156	8848	1
TK1545-KO-RNA0460	263034	1128910	865877	1781511	1
TK1545-KO-RNA0461	263043	263165	123	7455	1
TK1545-KO-RNA0462	263048	263182	135	16641	4
TK1545-KO-RNA0463	263153	263293	141	8452	1
TK1545-KO-RNA0464	263263	263459	197	11274	1
TK1545-KO-RNA0465	263271	263348	78	5159	3
TK1545-KO-RNA0466	263320	263618	299	16533	1
TK1545-KO-RNA0467	263366	263458	93	6991	2
TK1545-KO-RNA0468	263389	695606	432218	1600053	2
TK1545-KO-RNA0469	263403	263456	54	6090	1
TK1545-KO-RNA0470	263425	263613	189	22840	1
TK1545-KO-RNA0471	263434	263529	96	6481	1
TK1545-KO-RNA0472	263436	1107397	843962	1746389	1
TK1545-KO-RNA0473	263487	263624	138	8699	1
TK1545-KO-RNA0474	263571	263660	90	6632	1
TK1545-KO-RNA0475	263641	263706	66	5083	1
TK1545-KO-RNA0476	263641	263808	168	8589	1
TK1545-KO-RNA0477	264010	264133	124	350	1
TK1545-KO-RNA0478	264078	264152	75	834	2
TK1545-KO-RNA0479	264313	264368	56	1372	1
TK1545-KO-RNA0480	264377	264517	141	1961	1
TK1545-KO-RNA0481	264522	264665	144	1641	1
TK1545-KO-RNA0482	264587	264664	78	2137	1
TK1545-KO-RNA0483	264860	265078	219	2735	1
TK1545-KO-RNA0484	264923	264988	66	1143	1
TK1545-KO-RNA0485	264994	265784	791	8767	1
TK1545-KO-RNA0486	265049	265129	81	2661	1
TK1545-KO-RNA0487	265084	265245	162	2341	1
TK1545-KO-RNA0488	265273	265430	158	3289	1
TK1545-KO-RNA0489	265277	265480	204	2087	1
TK1545-KO-RNA0490	265409	265495	87	1256	1
TK1545-KO-RNA0491	265424	265482	59	861	1
TK1545-KO-RNA0492	265425	265574	150	1964	1
TK1545-KO-RNA0493	265463	265639	177	2335	1
TK1545-KO-RNA0494	265481	265549	69	1227	1
TK1545-KO-RNA0495	265559	265639	81	2804	1
TK1545-KO-RNA0496	265640	2023571	1757932	11247063	1
TK1545-KO-RNA0497	265713	265802	90	1885	1
TK1545-KO-RNA0498	265831	266055	225	2679	1
TK1545-KO-RNA0499	266904	267077	174	150	1
TK1545-KO-RNA0500	268272	268383	112	317	1
TK1545-KO-RNA0501	268874	268960	87	183	1
TK1545-KO-RNA0502	269286	2022858	1753573	3992825	1
TK1545-KO-RNA0503	269441	269496	56	153	1
TK1545-KO-RNA0504	269501	269634	134	129	1
TK1545-KO-RNA0505	274102	274171	70	4	1
TK1545-KO-RNA0506	281283	2025705	1744423	33863005	1
TK1545-KO-RNA0507	281572	281670	99	261	1
TK1545-KO-RNA0508	282067	282220	154	1642	2
TK1545-KO-RNA0509	282120	282215	96	682	1
TK1545-KO-RNA0510	282149	282317	169	928	1
TK1545-KO-RNA0511	282362	2027026	1744665	46915465	1
TK1545-KO-RNA0512	282489	282580	92	60	1
TK1545-KO-RNA0513	284584	284741	158	65	1
TK1545-KO-RNA0514	285553	285668	116	163	1
TK1545-KO-RNA0515	286124	286180	57	87	1
TK1545-KO-RNA0516	287204	287260	57	73	1
TK1545-KO-RNA0517	287205	287390	186	167	1
TK1545-KO-RNA0518	287665	287759	95	826	3
TK1545-KO-RNA0519	288654	288800	147	78	1
TK1545-KO-RNA0520	289115	289245	131	204	1
TK1545-KO-RNA0521	289136	289229	94	337	1
TK1545-KO-RNA0522	289194	289296	103	208	1
TK1545-KO-RNA0523	289210	289314	105	243	1
TK1545-KO-RNA0524	289237	289301	65	188	1
TK1545-KO-RNA0525	289669	289722	54	98	1
TK1545-KO-RNA0526	290093	290241	149	188	1
TK1545-KO-RNA0527	293052	293153	102	932	1
TK1545-KO-RNA0528	293223	2024641	1731419	19987600	1
TK1545-KO-RNA0529	293230	293283	54	619	1
TK1545-KO-RNA0530	293844	2023680	1729837	12569926	1
TK1545-KO-RNA0531	294053	294151	99	908	2
TK1545-KO-RNA0532	294056	294112	57	1167	1
TK1545-KO-RNA0533	294629	2024797	1730169	22198144	1
TK1545-KO-RNA0534	295455	295526	72	185	1
TK1545-KO-RNA0535	296682	296879	198	125	1
TK1545-KO-RNA0536	300630	2023056	1722427	5788810	1
TK1545-KO-RNA0537	302342	302424	83	256	1
TK1545-KO-RNA0538	302640	302756	117	992	1
TK1545-KO-RNA0539	302678	302798	121	508	1
TK1545-KO-RNA0540	302733	2024842	1722110	22899357	1
TK1545-KO-RNA0541	303177	303258	82	177	1
TK1545-KO-RNA0542	303629	303763	135	195	1
TK1545-KO-RNA0543	303720	303822	103	150	1
TK1545-KO-RNA0544	304033	304179	147	125	1
TK1545-KO-RNA0545	304106	304180	75	66	1
TK1545-KO-RNA0546	304744	304798	55	191	1
TK1545-KO-RNA0547	305022	305140	119	78	1
TK1545-KO-RNA0548	307013	307117	105	256	1
TK1545-KO-RNA0549	307018	2025284	1718267	29987772	1
TK1545-KO-RNA0550	307070	307131	62	113	1
TK1545-KO-RNA0551	309663	309782	120	101	1
TK1545-KO-RNA0552	309762	309816	55	70	2
TK1545-KO-RNA0553	310108	310278	171	173	1
TK1545-KO-RNA0554	311066	311157	92	229	1
TK1545-KO-RNA0555	311077	311193	117	153	1
TK1545-KO-RNA0556	314191	314326	136	1004	1
TK1545-KO-RNA0557	314257	314413	157	1251	2
TK1545-KO-RNA0558	314343	314495	153	1074	1
TK1545-KO-RNA0559	314685	314853	169	715	1
TK1545-KO-RNA0560	314928	314987	60	928	1
TK1545-KO-RNA0561	314935	315047	113	1272	3
TK1545-KO-RNA0562	315096	2025566	1710471	31924558	1
TK1545-KO-RNA0563	316242	316301	60	1035	2
TK1545-KO-RNA0564	316353	316457	105	2053	1
TK1545-KO-RNA0565	316407	316571	165	3770	1
TK1545-KO-RNA0566	316420	316571	152	3457	1
TK1545-KO-RNA0567	316428	316483	56	1740	1
TK1545-KO-RNA0568	316567	2022899	1706333	4318434	1
TK1545-KO-RNA0569	322530	322668	139	3	1
TK1545-KO-RNA0570	335239	335388	150	635	1
TK1545-KO-RNA0571	336131	336184	54	301	1
TK1545-KO-RNA0572	336168	336248	81	352	1
TK1545-KO-RNA0573	338359	338430	72	44	1
TK1545-KO-RNA0574	340665	340765	101	292	1
TK1545-KO-RNA0575	340673	340796	124	314	1
TK1545-KO-RNA0576	341203	341258	56	50	1
TK1545-KO-RNA0577	349159	2026279	1677121	39394218	1
TK1545-KO-RNA0578	349300	349355	56	519	1
TK1545-KO-RNA0579	350132	350222	91	443	1
TK1545-KO-RNA0580	352426	352582	157	7006	1
TK1545-KO-RNA0581	352538	352738	201	5366	1
TK1545-KO-RNA0582	352546	352717	172	4706	1
TK1545-KO-RNA0583	352551	352758	208	5354	1
TK1545-KO-RNA0584	352648	352762	115	3957	1
TK1545-KO-RNA0585	352689	352810	122	4166	1
TK1545-KO-RNA0586	352696	352811	116	4403	1
TK1545-KO-RNA0587	352696	352849	154	4637	1
TK1545-KO-RNA0588	352705	352812	108	3847	1
TK1545-KO-RNA0589	352783	2023759	1670977	13652000	1
TK1545-KO-RNA0590	352785	352850	66	4867	5
TK1545-KO-RNA0591	352785	352927	143	3371	1
TK1545-KO-RNA0592	352810	353044	235	3771	1
TK1545-KO-RNA0593	352969	578847	225879	416035	1
TK1545-KO-RNA0594	353059	353195	137	1102	1
TK1545-KO-RNA0595	356510	356680	171	9	1
TK1545-KO-RNA0596	361821	361922	102	124	1
TK1545-KO-RNA0597	361859	361969	111	171	1
TK1545-KO-RNA0598	362223	2023850	1661628	14352235	1
TK1545-KO-RNA0599	367289	367398	110	123	1
TK1545-KO-RNA0600	367575	367825	251	359	1
TK1545-KO-RNA0601	367630	367861	232	383	1
TK1545-KO-RNA0602	367735	367860	126	211	1
TK1545-KO-RNA0603	368330	368469	140	2725	3
TK1545-KO-RNA0604	368342	368481	140	2756	1
TK1545-KO-RNA0605	368350	368448	99	955	1
TK1545-KO-RNA0606	368356	368463	108	1186	1
TK1545-KO-RNA0607	368374	368478	105	2254	2
TK1545-KO-RNA0608	368381	2024782	1656402	22041184	1
TK1545-KO-RNA0609	368384	368458	75	1795	1
TK1545-KO-RNA0610	368390	368446	57	1479	3
TK1545-KO-RNA0611	368393	368467	75	1998	5
TK1545-KO-RNA0612	368413	368481	69	1911	1
TK1545-KO-RNA0613	368414	368467	54	820	1
TK1545-KO-RNA0614	368421	368477	57	932	2
TK1545-KO-RNA0615	368447	368542	96	1092	1
TK1545-KO-RNA0616	368460	368657	198	1418	1
TK1545-KO-RNA0617	368525	368629	105	1685	2
TK1545-KO-RNA0618	369030	1343795	974766	2393841	1
TK1545-KO-RNA0619	371486	371608	123	187	1
TK1545-KO-RNA0620	371495	2026135	1654641	38133296	1
TK1545-KO-RNA0621	371507	371725	219	408	1
TK1545-KO-RNA0622	371535	559906	188372	348206	1
TK1545-KO-RNA0623	371841	371921	81	576	1
TK1545-KO-RNA0624	371980	372053	74	293	1
TK1545-KO-RNA0625	372093	2025253	1653161	29528664	1
TK1545-KO-RNA0626	372096	372152	57	174	2
TK1545-KO-RNA0627	372614	372666	53	317	1
TK1545-KO-RNA0628	373471	373536	66	24	1
TK1545-KO-RNA0629	373503	2026792	1653290	44732894	1
TK1545-KO-RNA0630	373650	373713	64	20	1
TK1545-KO-RNA0631	373669	373735	67	38	1
TK1545-KO-RNA0632	378147	378319	173	49	2
TK1545-KO-RNA0633	379184	379344	161	85	1
TK1545-KO-RNA0634	380163	380320	158	127	1
TK1545-KO-RNA0635	380468	380672	205	141	1
TK1545-KO-RNA0636	381158	381211	54	60	1
TK1545-KO-RNA0637	382428	382580	153	196	2
TK1545-KO-RNA0638	389284	389398	115	196	1
TK1545-KO-RNA0639	389754	389822	69	146	1
TK1545-KO-RNA0640	390168	390264	97	123	1
TK1545-KO-RNA0641	391899	392333	435	135	1
TK1545-KO-RNA0642	392549	392702	154	1323	1
TK1545-KO-RNA0643	392657	2024638	1631982	19853272	1
TK1545-KO-RNA0644	392938	393036	99	1910	1
TK1545-KO-RNA0645	393064	393180	117	4406	1
TK1545-KO-RNA0646	393087	393200	114	1973	1
TK1545-KO-RNA0647	393113	2024620	1631508	19688906	1
TK1545-KO-RNA0648	393780	393833	54	17	2
TK1545-KO-RNA0649	394902	2025558	1630657	31827646	1
TK1545-KO-RNA0650	394911	395018	108	602	1
TK1545-KO-RNA0651	395254	395306	53	416	1
TK1545-KO-RNA0652	395399	2026919	1631521	45628871	1
TK1545-KO-RNA0653	395702	395943	242	1434	1
TK1545-KO-RNA0654	395905	395981	77	1287	2
TK1545-KO-RNA0655	396112	2025691	1629580	66357038	2
TK1545-KO-RNA0656	396587	2024883	1628297	23390669	1
TK1545-KO-RNA0657	397327	397381	55	527	1
TK1545-KO-RNA0658	397484	397544	61	1036	2
TK1545-KO-RNA0659	397532	2027456	1629925	49507972	1
TK1545-KO-RNA0660	397636	397692	57	717	3
TK1545-KO-RNA0661	397732	397821	90	973	1
TK1545-KO-RNA0662	397756	397845	90	1894	2
TK1545-KO-RNA0663	397795	397890	96	918	1
TK1545-KO-RNA0664	397832	397913	82	829	1
TK1545-KO-RNA0665	399445	399574	130	165	1
TK1545-KO-RNA0666	399858	399969	112	126	1
TK1545-KO-RNA0667	401538	401668	131	178	1
TK1545-KO-RNA0668	402277	402420	144	205	1
TK1545-KO-RNA0669	402683	402772	90	114	1
TK1545-KO-RNA0670	403535	403671	137	160	1
TK1545-KO-RNA0671	404104	404169	66	45	1
TK1545-KO-RNA0672	404539	610783	206245	502229	1
TK1545-KO-RNA0673	404681	404893	213	3537	1
TK1545-KO-RNA0674	404700	2026783	1622084	44141435	1
TK1545-KO-RNA0675	404718	404864	147	2401	1
TK1545-KO-RNA0676	404902	404973	72	1685	1
TK1545-KO-RNA0677	404905	404994	90	4382	2
TK1545-KO-RNA0678	404906	2024933	1620028	23727243	1
TK1545-KO-RNA0679	404991	405110	120	2353	2
TK1545-KO-RNA0680	405012	405164	153	2697	1
TK1545-KO-RNA0681	405088	405339	252	2129	1
TK1545-KO-RNA0682	405125	405338	214	1638	1
TK1545-KO-RNA0683	405163	405255	93	1048	1
TK1545-KO-RNA0684	405164	405338	175	1210	1
TK1545-KO-RNA0685	405177	405338	162	1052	1
TK1545-KO-RNA0686	405213	405337	125	655	1
TK1545-KO-RNA0687	406262	406346	85	287	2
TK1545-KO-RNA0688	406902	407098	197	1728	1
TK1545-KO-RNA0689	406923	2026702	1619780	43192976	1
TK1545-KO-RNA0690	406924	407268	345	3592	1
TK1545-KO-RNA0691	406963	407142	180	2068	1
TK1545-KO-RNA0692	406993	407099	107	1390	1
TK1545-KO-RNA0693	407069	407143	75	2664	1
TK1545-KO-RNA0694	407070	2024677	1617608	20380414	1
TK1545-KO-RNA0695	407117	407179	63	2587	1
TK1545-KO-RNA0696	407204	407369	166	2225	1
TK1545-KO-RNA0697	407205	407274	70	2627	3
TK1545-KO-RNA0698	407303	407368	66	2156	2
TK1545-KO-RNA0699	407314	2023253	1615940	7884981	1
TK1545-KO-RNA0700	407486	407578	93	1604	1
TK1545-KO-RNA0701	407491	407568	78	1485	1
TK1545-KO-RNA0702	407498	407575	78	2936	3
TK1545-KO-RNA0703	407573	407767	195	2579	1
TK1545-KO-RNA0704	407686	407745	60	1167	1
TK1545-KO-RNA0705	407705	407822	118	1955	1
TK1545-KO-RNA0706	407746	2027547	1619802	50667876	1
TK1545-KO-RNA0707	407794	407867	74	2555	8
TK1545-KO-RNA0708	407956	953230	545275	1262117	1
TK1545-KO-RNA0709	409463	2023908	1614446	15480242	1
TK1545-KO-RNA0710	409490	409594	105	354	1
TK1545-KO-RNA0711	409562	2023216	1613655	7767652	1
TK1545-KO-RNA0712	410704	2025826	1615123	35125572	1
TK1545-KO-RNA0713	410848	410983	136	216	1
TK1545-KO-RNA0714	410913	410993	81	135	1
TK1545-KO-RNA0715	410931	411031	101	165	1
TK1545-KO-RNA0716	411357	411536	180	582	1
TK1545-KO-RNA0717	411514	411711	198	362	1
TK1545-KO-RNA0718	411525	411710	186	360	2
TK1545-KO-RNA0719	411908	2024001	1612094	16554571	1
TK1545-KO-RNA0720	412001	412065	65	309	1
TK1545-KO-RNA0721	412369	412767	399	1206	1
TK1545-KO-RNA0722	412750	412818	69	425	1
TK1545-KO-RNA0723	413420	413557	138	403	1
TK1545-KO-RNA0724	413654	415569	1916	1647	1
TK1545-KO-RNA0725	413663	413771	109	327	1
TK1545-KO-RNA0726	414029	414121	93	306	1
TK1545-KO-RNA0727	415541	415660	120	18	1
TK1545-KO-RNA0728	419497	419898	402	1248	1
TK1545-KO-RNA0729	419910	420038	129	1045	4
TK1545-KO-RNA0730	420973	2027595	1606623	50929599	1
TK1545-KO-RNA0731	421249	421748	500	3369	1
TK1545-KO-RNA0732	421340	421532	193	1624	1
TK1545-KO-RNA0733	421344	421419	76	1665	1
TK1545-KO-RNA0734	421469	2023582	1602114	11377264	1
TK1545-KO-RNA0735	421633	421747	115	1646	1
TK1545-KO-RNA0736	421908	422082	175	1270	1
TK1545-KO-RNA0737	422059	422130	72	1748	3
TK1545-KO-RNA0738	422260	422328	69	1469	2
TK1545-KO-RNA0739	422411	422512	102	1088	1
TK1545-KO-RNA0740	422497	422550	54	613	1
TK1545-KO-RNA0741	422522	422641	120	1006	1
TK1545-KO-RNA0742	422582	2023212	1600631	7740892	1
TK1545-KO-RNA0743	423852	424014	163	190	1
TK1545-KO-RNA0744	424218	424305	88	166	2
TK1545-KO-RNA0745	424231	2024482	1600252	19220499	1
TK1545-KO-RNA0746	424244	2024062	1599819	34891965	2
TK1545-KO-RNA0747	429014	429140	127	530	2
TK1545-KO-RNA0748	429382	429453	72	356	1
TK1545-KO-RNA0749	429420	1340980	911561	2256810	1
TK1545-KO-RNA0750	429803	429990	188	643	1
TK1545-KO-RNA0751	430557	430636	80	292	1
TK1545-KO-RNA0752	431180	431362	183	487	1
TK1545-KO-RNA0753	431789	431854	66	276	1
TK1545-KO-RNA0754	431937	431993	57	347	1
TK1545-KO-RNA0755	431992	1813053	1381062	3359974	1
TK1545-KO-RNA0756	432987	2026938	1593952	45160600	1
TK1545-KO-RNA0757	435711	435846	136	110	1
TK1545-KO-RNA0758	435785	435871	87	35	1
TK1545-KO-RNA0759	436377	436474	98	473	1
TK1545-KO-RNA0760	437999	2023803	1585805	13994136	1
TK1545-KO-RNA0761	443000	443113	114	193	3
TK1545-KO-RNA0762	443943	963347	519405	1245359	1
TK1545-KO-RNA0763	444316	2023152	1578837	7017800	1
TK1545-KO-RNA0764	444814	444957	144	106	1
TK1545-KO-RNA0765	445204	445257	54	61	1
TK1545-KO-RNA0766	446805	446867	63	35	1
TK1545-KO-RNA0767	446885	447016	132	83	1
TK1545-KO-RNA0768	448209	448288	80	37	1
TK1545-KO-RNA0769	450044	450173	130	256	1
TK1545-KO-RNA0770	450146	450310	165	179	2
TK1545-KO-RNA0771	450156	450229	74	170	1
TK1545-KO-RNA0772	451075	451332	258	16733	1
TK1545-KO-RNA0773	451095	451244	150	9685	1
TK1545-KO-RNA0774	451099	451256	158	21801	3
TK1545-KO-RNA0775	451162	451323	162	13883	2
TK1545-KO-RNA0776	451188	451322	135	12834	1
TK1545-KO-RNA0777	451217	451326	110	11141	2
TK1545-KO-RNA0778	451220	451333	114	23119	2
TK1545-KO-RNA0779	451221	2027598	1576378	50237056	1
TK1545-KO-RNA0780	451263	451416	154	14692	1
TK1545-KO-RNA0781	451292	451365	74	18583	2
TK1545-KO-RNA0782	451300	451371	72	17942	4
TK1545-KO-RNA0783	451303	2026364	1575062	40416208	1
TK1545-KO-RNA0784	451308	2022968	1571661	4707427	1
TK1545-KO-RNA0785	451339	2025198	1573860	27974730	1
TK1545-KO-RNA0786	451354	451508	155	11818	1
TK1545-KO-RNA0787	451356	2026679	1575324	42918136	1
TK1545-KO-RNA0788	451375	451452	78	16535	1
TK1545-KO-RNA0789	451378	451491	114	19265	1
TK1545-KO-RNA0790	451379	451476	98	18357	2
TK1545-KO-RNA0791	451389	451493	105	17373	3
TK1545-KO-RNA0792	451410	451580	171	11999	1
TK1545-KO-RNA0793	451437	2027547	1576111	49940611	1
TK1545-KO-RNA0794	451471	451602	132	8154	2
TK1545-KO-RNA0795	451477	451566	90	7758	1
TK1545-KO-RNA0796	451495	2027583	1576089	50218254	2
TK1545-KO-RNA0797	451563	451621	59	3970	1
TK1545-KO-RNA0798	451571	451629	59	2782	1
TK1545-KO-RNA0799	453305	1040152	586848	1341475	1
TK1545-KO-RNA0800	453659	453759	101	1865	1
TK1545-KO-RNA0801	453667	453735	69	1480	1
TK1545-KO-RNA0802	453988	454096	109	3888	4
TK1545-KO-RNA0803	454024	454092	69	2958	2
TK1545-KO-RNA0804	454069	454197	129	3782	2
TK1545-KO-RNA0805	454097	454354	258	3529	1
TK1545-KO-RNA0806	454170	454457	288	4428	1
TK1545-KO-RNA0807	454199	454252	54	1164	1
TK1545-KO-RNA0808	454223	2025557	1571335	32102444	1
TK1545-KO-RNA0809	454248	454454	207	3691	1
TK1545-KO-RNA0810	454251	454644	394	4186	1
TK1545-KO-RNA0811	454293	454360	68	1476	2
TK1545-KO-RNA0812	454363	454434	72	1888	1
TK1545-KO-RNA0813	454436	454580	145	1766	1
TK1545-KO-RNA0814	454723	454805	83	370	8
TK1545-KO-RNA0815	456440	456496	57	169	1
TK1545-KO-RNA0816	457000	457086	87	555	1
TK1545-KO-RNA0817	457328	457390	63	508	1
TK1545-KO-RNA0818	457974	458036	63	82	1
TK1545-KO-RNA0819	458449	1865700	1407252	3380410	1
TK1545-KO-RNA0820	458451	2024930	1566480	23754275	1
TK1545-KO-RNA0821	458452	2023679	1565228	12332864	1
TK1545-KO-RNA0822	458453	877222	418770	1030761	1
TK1545-KO-RNA0823	458456	2009719	1551264	3692497	1
TK1545-KO-RNA0824	458501	458646	146	21523	3
TK1545-KO-RNA0825	458521	458588	68	5451	1
TK1545-KO-RNA0826	458569	458874	306	19789	1
TK1545-KO-RNA0827	458628	458787	160	12511	1
TK1545-KO-RNA0828	458675	458812	138	9747	1
TK1545-KO-RNA0829	458676	458753	78	6385	1
TK1545-KO-RNA0830	458725	2024810	1566086	22218821	1
TK1545-KO-RNA0831	458814	458966	153	13544	1
TK1545-KO-RNA0832	458883	459060	178	16114	1
TK1545-KO-RNA0833	458885	458947	63	6833	1
TK1545-KO-RNA0834	458891	1348266	889376	2261310	1
TK1545-KO-RNA0835	458891	459028	138	11377	2
TK1545-KO-RNA0836	458899	2027393	1568495	49285201	1
TK1545-KO-RNA0837	458916	459053	138	13666	1
TK1545-KO-RNA0838	458922	459083	162	28923	1
TK1545-KO-RNA0839	458963	459158	196	12206	1
TK1545-KO-RNA0840	458973	459028	56	6567	1
TK1545-KO-RNA0841	458994	2027548	1568555	49953875	1
TK1545-KO-RNA0842	459038	2026782	1567745	43991182	1
TK1545-KO-RNA0843	459040	459158	119	6725	1
TK1545-KO-RNA0844	459055	459165	111	6219	1
TK1545-KO-RNA0845	460084	460209	126	126	1
TK1545-KO-RNA0846	462071	462154	84	2802	1
TK1545-KO-RNA0847	462077	2023468	1561392	19659926	1
TK1545-KO-RNA0848	462146	462228	83	1625	1
TK1545-KO-RNA0849	462148	462269	122	1636	1
TK1545-KO-RNA0850	462151	462242	92	1633	1
TK1545-KO-RNA0851	462737	462965	229	1091	1
TK1545-KO-RNA0852	462778	462964	187	967	1
TK1545-KO-RNA0853	463141	463215	75	580	1
TK1545-KO-RNA0854	463896	464063	168	605	1
TK1545-KO-RNA0855	463946	464057	112	410	1
TK1545-KO-RNA0856	464094	464199	106	525	3
TK1545-KO-RNA0857	464117	464315	199	954	1
TK1545-KO-RNA0858	464340	464523	184	1017	1
TK1545-KO-RNA0859	464420	464477	58	442	1
TK1545-KO-RNA0860	464573	464739	167	1010	1
TK1545-KO-RNA0861	464760	464968	209	904	1
TK1545-KO-RNA0862	464760	464882	123	723	1
TK1545-KO-RNA0863	464761	464897	137	1536	1
TK1545-KO-RNA0864	464813	464898	86	457	1
TK1545-KO-RNA0865	464873	464984	112	420	1
TK1545-KO-RNA0866	465068	465169	102	195	1
TK1545-KO-RNA0867	465341	465511	171	512	1
TK1545-KO-RNA0868	465399	465702	304	907	1
TK1545-KO-RNA0869	465493	2023209	1557717	7580376	1
TK1545-KO-RNA0870	465529	465621	93	308	1
TK1545-KO-RNA0871	465625	465729	105	535	1
TK1545-KO-RNA0872	465791	466018	228	1093	1
TK1545-KO-RNA0873	466240	466585	346	1201	1
TK1545-KO-RNA0874	466443	466538	96	506	1
TK1545-KO-RNA0875	466512	466604	93	512	1
TK1545-KO-RNA0876	467654	467736	83	633	9
TK1545-KO-RNA0877	467814	468030	217	947	1
TK1545-KO-RNA0878	467903	467956	54	327	1
TK1545-KO-RNA0879	468167	468298	132	1192	2
TK1545-KO-RNA0880	468243	468335	93	536	1
TK1545-KO-RNA0881	468452	468610	159	667	1
TK1545-KO-RNA0882	470227	470295	69	16	1
TK1545-KO-RNA0883	470366	470429	64	65	1
TK1545-KO-RNA0884	470433	2023758	1553326	13248509	1
TK1545-KO-RNA0885	472943	473054	112	266	2
TK1545-KO-RNA0886	473113	473202	90	316	1
TK1545-KO-RNA0887	473169	2022935	1549767	4384071	1
TK1545-KO-RNA0888	473394	473463	70	602	5
TK1545-KO-RNA0889	473448	473505	58	225	1
TK1545-KO-RNA0890	473472	473621	150	356	1
TK1545-KO-RNA0891	473704	473909	206	404	1
TK1545-KO-RNA0892	475895	476147	253	361	1
TK1545-KO-RNA0893	475905	475966	62	130	1
TK1545-KO-RNA0894	476281	2025984	1549704	36284468	1
TK1545-KO-RNA0895	476846	476930	85	68	1
TK1545-KO-RNA0896	477299	477460	162	88	1
TK1545-KO-RNA0897	478757	478825	69	607	1
TK1545-KO-RNA0898	479177	479233	57	24	1
TK1545-KO-RNA0899	479900	480109	210	836	1
TK1545-KO-RNA0900	479985	480140	156	1355	1
TK1545-KO-RNA0901	479995	480147	153	628	1
TK1545-KO-RNA0902	480035	480182	148	489	1
TK1545-KO-RNA0903	480038	480137	100	515	1
TK1545-KO-RNA0904	480774	481072	299	12358	1
TK1545-KO-RNA0905	480830	480893	64	3490	2
TK1545-KO-RNA0906	480831	2023821	1542991	14103712	1
TK1545-KO-RNA0907	480837	480890	54	3394	2
TK1545-KO-RNA0908	480857	480996	140	17791	2
TK1545-KO-RNA0909	480877	480936	60	9038	1
TK1545-KO-RNA0910	480886	480953	68	6293	1
TK1545-KO-RNA0911	480886	480995	110	17508	2
TK1545-KO-RNA0912	480943	1134051	653109	1461578	1
TK1545-KO-RNA0913	480943	481038	96	14717	1
TK1545-KO-RNA0914	480947	481087	141	11813	1
TK1545-KO-RNA0915	480949	481011	63	6198	1
TK1545-KO-RNA0916	480951	481025	75	6654	1
TK1545-KO-RNA0917	480955	481035	81	14176	44
TK1545-KO-RNA0918	480961	481042	82	14463	2
TK1545-KO-RNA0919	480973	481118	146	10980	1
TK1545-KO-RNA0920	480986	481042	57	12262	15
TK1545-KO-RNA0921	480990	481112	123	20235	1
TK1545-KO-RNA0922	480997	481150	154	9352	1
TK1545-KO-RNA0923	481021	481150	130	7480	1
TK1545-KO-RNA0924	481030	481115	86	13940	1
TK1545-KO-RNA0925	481835	481942	108	51	1
TK1545-KO-RNA0926	486910	487023	114	102	1
TK1545-KO-RNA0927	487822	2024981	1537160	24549976	1
TK1545-KO-RNA0928	487962	488051	90	263	1
TK1545-KO-RNA0929	487966	488121	156	210	1
TK1545-KO-RNA0930	488446	488601	156	209	1
TK1545-KO-RNA0931	489574	489681	108	244	1
TK1545-KO-RNA0932	490056	2024825	1534770	22283367	1
TK1545-KO-RNA0933	490781	490938	158	4838	1
TK1545-KO-RNA0934	490897	491037	141	6187	1
TK1545-KO-RNA0935	490909	490962	54	3214	1
TK1545-KO-RNA0936	490919	490972	54	6386	48
TK1545-KO-RNA0937	490931	2023913	1532983	15337486	1
TK1545-KO-RNA0938	490970	491189	220	15504	1
TK1545-KO-RNA0939	491021	491092	72	4215	2
TK1545-KO-RNA0940	491022	491077	56	7593	2
TK1545-KO-RNA0941	491028	491084	57	7581	3
TK1545-KO-RNA0942	491036	491092	57	6993	9
TK1545-KO-RNA0943	491100	491190	91	6303	1
TK1545-KO-RNA0944	491107	2027297	1536191	49591030	1
TK1545-KO-RNA0945	491305	2023789	1532485	13691481	1
TK1545-KO-RNA0946	491347	2023743	1532397	13148853	1
TK1545-KO-RNA0947	491419	2024881	1533463	23137662	1
TK1545-KO-RNA0948	491472	491565	94	8364	1
TK1545-KO-RNA0949	491662	2025874	1534213	35526710	1
TK1545-KO-RNA0950	491663	2027161	1535499	48552344	1
TK1545-KO-RNA0951	491688	491779	92	2351	1
TK1545-KO-RNA0952	491923	2027134	1535212	47502956	1
TK1545-KO-RNA0953	492006	2024790	1532785	21917996	1
TK1545-KO-RNA0954	492112	492180	69	1038	1
TK1545-KO-RNA0955	492142	781641	289500	696852	1
TK1545-KO-RNA0956	492501	492596	96	981	1
TK1545-KO-RNA0957	492743	492798	56	936	1
TK1545-KO-RNA0958	492954	2024763	1531810	21487062	1
TK1545-KO-RNA0959	494404	2025815	1531412	34346265	1
TK1545-KO-RNA0960	494482	494754	273	550	1
TK1545-KO-RNA0961	494855	494963	109	320	1
TK1545-KO-RNA0962	495552	495685	134	427	1
TK1545-KO-RNA0963	495965	496086	122	512	1
TK1545-KO-RNA0964	498096	498156	61	738	1
TK1545-KO-RNA0965	498347	498460	114	1089	2
TK1545-KO-RNA0966	498351	498437	87	1881	2
TK1545-KO-RNA0967	498599	498715	117	830	1
TK1545-KO-RNA0968	498626	2026472	1527847	41090416	1
TK1545-KO-RNA0969	498944	499033	90	909	1
TK1545-KO-RNA0970	498967	1872096	1373130	3282138	1
TK1545-KO-RNA0971	499085	499218	134	1093	1
TK1545-KO-RNA0972	507349	507419	71	86	1
TK1545-KO-RNA0973	509126	509206	81	207	1
TK1545-KO-RNA0974	509595	509648	54	61	1
TK1545-KO-RNA0975	510676	510735	60	39	1
TK1545-KO-RNA0976	511574	2025059	1513486	25829152	1
TK1545-KO-RNA0977	511910	512045	136	155	1
TK1545-KO-RNA0978	512377	512498	122	92	1
TK1545-KO-RNA0979	513533	2023162	1509630	7206847	1
TK1545-KO-RNA0980	513631	2024920	1511290	23398618	1
TK1545-KO-RNA0981	513632	2025024	1511393	25315417	1
TK1545-KO-RNA0982	517156	517218	63	10	1
TK1545-KO-RNA0983	527225	527344	120	3591	1
TK1545-KO-RNA0984	527593	527722	130	576	2
TK1545-KO-RNA0985	527713	527865	153	417	1
TK1545-KO-RNA0986	533036	533089	54	140	1
TK1545-KO-RNA0987	534288	534344	57	144	1
TK1545-KO-RNA0988	534293	534391	99	171	1
TK1545-KO-RNA0989	534715	534882	168	172	1
TK1545-KO-RNA0990	535116	535280	165	393	1
TK1545-KO-RNA0991	540921	540973	53	64	1
TK1545-KO-RNA0992	545128	545234	107	27	1
TK1545-KO-RNA0993	546476	546556	81	41	2
TK1545-KO-RNA0994	547864	547917	54	663	1
TK1545-KO-RNA0995	548024	548221	198	1492	1
TK1545-KO-RNA0996	548280	548362	83	451	2
TK1545-KO-RNA0997	548369	548467	99	336	1
TK1545-KO-RNA0998	548388	2023912	1475525	15228340	1
TK1545-KO-RNA0999	548715	548810	96	148	1
TK1545-KO-RNA1000	549179	549252	74	237	1
TK1545-KO-RNA1001	549375	549488	114	179	1
TK1545-KO-RNA1002	549752	549818	67	281	1
TK1545-KO-RNA1003	553518	553638	121	528	1
TK1545-KO-RNA1004	553840	553904	65	32	1
TK1545-KO-RNA1005	554113	2024003	1469891	16518067	1
TK1545-KO-RNA1006	554722	1784654	1229933	2946417	1
TK1545-KO-RNA1007	556678	556768	91	454	1
TK1545-KO-RNA1008	556853	557036	184	2354	1
TK1545-KO-RNA1009	556867	1493117	936251	2368042	1
TK1545-KO-RNA1010	558391	558558	168	267	1
TK1545-KO-RNA1011	559576	559690	115	1120	1
TK1545-KO-RNA1012	559642	2022904	1463263	3989230	1
TK1545-KO-RNA1013	559729	559857	129	2441	1
TK1545-KO-RNA1014	559733	2023559	1463827	10724028	1
TK1545-KO-RNA1015	559785	559979	195	3734	1
TK1545-KO-RNA1016	559799	559918	120	2861	1
TK1545-KO-RNA1017	559948	560187	240	5018	1
TK1545-KO-RNA1018	560006	1133041	573036	1299389	1
TK1545-KO-RNA1019	560119	560172	54	1752	1
TK1545-KO-RNA1020	560172	560267	96	5235	5
TK1545-KO-RNA1021	560258	560399	142	3066	1
TK1545-KO-RNA1022	560447	560581	135	5354	1
TK1545-KO-RNA1023	560586	560831	246	3501	2
TK1545-KO-RNA1024	560596	560801	206	5996	3
TK1545-KO-RNA1025	560712	560828	117	1313	1
TK1545-KO-RNA1026	560857	560986	130	536	2
TK1545-KO-RNA1027	561389	561469	81	373	1
TK1545-KO-RNA1028	561510	561740	231	620	1
TK1545-KO-RNA1029	561543	561741	199	527	1
TK1545-KO-RNA1030	561671	561781	111	359	1
TK1545-KO-RNA1031	561713	561783	71	260	1
TK1545-KO-RNA1032	562296	2026924	1464629	44740862	1
TK1545-KO-RNA1033	562994	563061	68	516	3
TK1545-KO-RNA1034	563502	563605	104	196	1
TK1545-KO-RNA1035	563736	2025252	1461517	28767379	1
TK1545-KO-RNA1036	563938	2027131	1463194	47993773	1
TK1545-KO-RNA1037	565585	565658	74	100	2
TK1545-KO-RNA1038	566067	566261	195	160	1
TK1545-KO-RNA1039	567326	567403	78	92	1
TK1545-KO-RNA1040	567680	567740	61	945	1
TK1545-KO-RNA1041	567790	567915	126	2124	1
TK1545-KO-RNA1042	567846	567914	69	2804	4
TK1545-KO-RNA1043	567859	567927	69	1548	3
TK1545-KO-RNA1044	567899	568026	128	2110	1
TK1545-KO-RNA1045	567917	567981	65	1250	1
TK1545-KO-RNA1046	568001	568102	102	1719	1
TK1545-KO-RNA1047	568028	568105	78	3272	2
TK1545-KO-RNA1048	568183	568299	117	3393	1
TK1545-KO-RNA1049	568894	2027550	1458657	50424913	1
TK1545-KO-RNA1050	568913	569171	259	3452	1
TK1545-KO-RNA1051	568956	569171	216	3102	1
TK1545-KO-RNA1052	568985	569171	187	2857	1
TK1545-KO-RNA1053	569007	2023564	1454558	10721521	1
TK1545-KO-RNA1054	569016	569171	156	2596	1
TK1545-KO-RNA1055	569317	569453	137	3777	1
TK1545-KO-RNA1056	569324	569379	56	2329	1
TK1545-KO-RNA1057	569508	569569	62	1000	1
TK1545-KO-RNA1058	569546	2024665	1455120	19939948	1
TK1545-KO-RNA1059	569605	569689	85	1326	1
TK1545-KO-RNA1060	569617	569791	175	2530	1
TK1545-KO-RNA1061	569618	569690	73	1398	1
TK1545-KO-RNA1062	569658	569798	141	2040	1
TK1545-KO-RNA1063	569661	569744	84	2723	1
TK1545-KO-RNA1064	569854	570015	162	2767	1
TK1545-KO-RNA1065	569856	569909	54	2961	2
TK1545-KO-RNA1066	570012	570107	96	1754	1
TK1545-KO-RNA1067	570092	570212	121	987	1
TK1545-KO-RNA1068	572487	572543	57	134	1
TK1545-KO-RNA1069	572569	572832	264	547	1
TK1545-KO-RNA1070	572747	572813	67	189	1
TK1545-KO-RNA1071	573993	574100	108	463	3
TK1545-KO-RNA1072	574404	574462	59	166	1
TK1545-KO-RNA1073	574655	574822	168	250	1
TK1545-KO-RNA1074	574804	574923	120	275	1
TK1545-KO-RNA1075	575939	576019	81	103	1
TK1545-KO-RNA1076	579315	579440	126	5024	1
TK1545-KO-RNA1077	579331	579466	136	5159	1
TK1545-KO-RNA1078	579338	579464	127	10388	5
TK1545-KO-RNA1079	579420	2024910	1445491	23336289	1
TK1545-KO-RNA1080	579424	2024626	1445203	19321083	1
TK1545-KO-RNA1081	579425	2025372	1445948	30332454	1
TK1545-KO-RNA1082	579427	2023267	1443841	7667618	1
TK1545-KO-RNA1083	579429	579499	71	2702	1
TK1545-KO-RNA1084	579435	2025273	1445839	29486885	1
TK1545-KO-RNA1085	579618	579713	96	343	1
TK1545-KO-RNA1086	579942	580114	173	815	1
TK1545-KO-RNA1087	580217	580280	64	825	1
TK1545-KO-RNA1088	580392	580533	142	509	1
TK1545-KO-RNA1089	580945	2026926	1445982	44702664	1
TK1545-KO-RNA1090	581114	581404	291	690	1
TK1545-KO-RNA1091	581333	581434	102	300	1
TK1545-KO-RNA1092	581375	581488	114	290	2
TK1545-KO-RNA1093	582288	582349	62	151	1
TK1545-KO-RNA1094	582622	582724	103	112	1
TK1545-KO-RNA1095	583656	583784	129	1524	1
TK1545-KO-RNA1096	583910	584068	159	3769	1
TK1545-KO-RNA1097	583975	584069	95	2588	3
TK1545-KO-RNA1098	584038	584091	54	1992	1
TK1545-KO-RNA1099	584043	584165	123	1886	1
TK1545-KO-RNA1100	584178	584270	93	3665	2
TK1545-KO-RNA1101	584271	2023654	1439384	12064624	1
TK1545-KO-RNA1102	584279	584404	126	4749	3
TK1545-KO-RNA1103	584297	584355	59	1318	1
TK1545-KO-RNA1104	584386	584484	99	3992	4
TK1545-KO-RNA1105	584387	584503	117	2095	1
TK1545-KO-RNA1106	584415	584476	62	1552	3
TK1545-KO-RNA1107	584417	584491	75	1659	1
TK1545-KO-RNA1108	584580	584693	114	2152	1
TK1545-KO-RNA1109	584616	1312607	727992	1755330	1
TK1545-KO-RNA1110	584654	584800	147	2948	1
TK1545-KO-RNA1111	584706	584843	138	3113	1
TK1545-KO-RNA1112	584759	584964	206	3861	1
TK1545-KO-RNA1113	584787	584840	54	1650	1
TK1545-KO-RNA1114	584994	585046	53	3464	1
TK1545-KO-RNA1115	585032	585157	126	4098	4
TK1545-KO-RNA1116	585098	585245	148	1634	1
TK1545-KO-RNA1117	585877	586036	160	238	1
TK1545-KO-RNA1118	585896	586036	141	199	1
TK1545-KO-RNA1119	588136	588278	143	21	1
TK1545-KO-RNA1120	590014	590159	146	575	1
TK1545-KO-RNA1121	590139	590234	96	812	1
TK1545-KO-RNA1122	590152	590237	86	803	1
TK1545-KO-RNA1123	590228	590391	164	2784	2
TK1545-KO-RNA1124	590281	590385	105	1030	1
TK1545-KO-RNA1125	590356	590462	107	1086	1
TK1545-KO-RNA1126	590727	590897	171	1333	1
TK1545-KO-RNA1127	590807	590946	140	1299	1
TK1545-KO-RNA1128	590836	590969	134	1282	1
TK1545-KO-RNA1129	590915	2025758	1434844	34037571	1
TK1545-KO-RNA1130	590994	591113	120	1603	1
TK1545-KO-RNA1131	591334	591513	180	2291	1
TK1545-KO-RNA1132	591424	591477	54	998	1
TK1545-KO-RNA1133	591567	591721	155	1651	1
TK1545-KO-RNA1134	591763	591893	131	1193	1
TK1545-KO-RNA1135	591765	2027597	1435833	50554797	1
TK1545-KO-RNA1136	591997	592050	54	558	1
TK1545-KO-RNA1137	592114	592252	139	1333	1
TK1545-KO-RNA1138	593926	594115	190	86	1
TK1545-KO-RNA1139	594086	594232	147	55	1
TK1545-KO-RNA1140	595648	595847	200	82	1
TK1545-KO-RNA1141	595825	595893	69	99	2
TK1545-KO-RNA1142	596521	596580	60	48	2
TK1545-KO-RNA1143	597806	597907	102	40	1
TK1545-KO-RNA1144	603781	603858	78	104	1
TK1545-KO-RNA1145	604181	604262	82	106	1
TK1545-KO-RNA1146	606020	606092	73	103	1
TK1545-KO-RNA1147	607126	607224	99	137	1
TK1545-KO-RNA1148	607229	2023683	1416455	12144924	1
TK1545-KO-RNA1149	607617	607709	93	137	1
TK1545-KO-RNA1150	608020	608087	68	108	1
TK1545-KO-RNA1151	608821	2025507	1416687	30667318	1
TK1545-KO-RNA1152	609673	609805	133	9403	3
TK1545-KO-RNA1153	609689	609844	156	12271	1
TK1545-KO-RNA1154	609716	609910	195	18632	1
TK1545-KO-RNA1155	609736	609827	92	21623	2
TK1545-KO-RNA1156	609746	609833	88	9371	1
TK1545-KO-RNA1157	609748	609845	98	19830	2
TK1545-KO-RNA1158	609774	609921	148	15538	1
TK1545-KO-RNA1159	609774	2024909	1415136	23106083	1
TK1545-KO-RNA1160	609778	609945	168	34263	4
TK1545-KO-RNA1161	609778	609988	211	20893	1
TK1545-KO-RNA1162	609779	609907	129	28469	3
TK1545-KO-RNA1163	609780	2025112	1415333	26871486	1
TK1545-KO-RNA1164	609782	2026220	1416439	37907017	1
TK1545-KO-RNA1165	609784	2023156	1413373	13547071	2
TK1545-KO-RNA1166	609792	609898	107	13478	1
TK1545-KO-RNA1167	609798	610131	334	30519	1
TK1545-KO-RNA1168	609803	609945	143	30008	2
TK1545-KO-RNA1169	609805	2025767	1415963	34053889	1
TK1545-KO-RNA1170	609810	2025774	1415965	34069553	1
TK1545-KO-RNA1171	609813	609917	105	12718	5
TK1545-KO-RNA1172	609822	609945	124	14071	1
TK1545-KO-RNA1173	609836	609946	111	14083	2
TK1545-KO-RNA1174	609862	609917	56	9549	2
TK1545-KO-RNA1175	609873	609944	72	10818	1
TK1545-KO-RNA1176	609883	2026131	1416249	37170786	1
TK1545-KO-RNA1177	609883	609942	60	9617	3
TK1545-KO-RNA1178	609886	609963	78	20647	54
TK1545-KO-RNA1179	609891	2026941	1417051	45409811	1
TK1545-KO-RNA1180	609915	610103	189	35634	1
TK1545-KO-RNA1181	609918	610031	114	12097	1
TK1545-KO-RNA1182	609921	609977	57	8365	1
TK1545-KO-RNA1183	609924	2026793	1416870	43715403	1
TK1545-KO-RNA1184	609929	2023790	1413862	13310145	1
TK1545-KO-RNA1185	609931	2023758	1413828	12993374	1
TK1545-KO-RNA1186	609938	2025126	1415189	27242779	1
TK1545-KO-RNA1187	609958	2023754	1413797	12972262	1
TK1545-KO-RNA1188	609964	610042	79	7725	1
TK1545-KO-RNA1189	609989	610080	92	8974	1
TK1545-KO-RNA1190	609995	610048	54	5467	1
TK1545-KO-RNA1191	610010	610168	159	14762	1
TK1545-KO-RNA1192	610034	2027328	1417295	49411249	1
TK1545-KO-RNA1193	610045	610168	124	11593	1
TK1545-KO-RNA1194	610048	2023570	1413523	21335774	1
TK1545-KO-RNA1195	610067	610138	72	17266	3
TK1545-KO-RNA1196	610123	2026796	1416674	43721496	1
TK1545-KO-RNA1197	610134	610190	57	15296	2
TK1545-KO-RNA1198	610140	2024797	1414658	21637434	1
TK1545-KO-RNA1199	610190	610297	108	20755	2
TK1545-KO-RNA1200	610200	610292	93	19383	6
TK1545-KO-RNA1201	610201	2023410	1413210	8778094	1
TK1545-KO-RNA1202	610203	610305	103	20846	1
TK1545-KO-RNA1203	610213	2024109	1413897	17265243	1
TK1545-KO-RNA1204	610271	610360	90	20309	1
TK1545-KO-RNA1205	610306	2022978	1412673	4410108	1
TK1545-KO-RNA1206	610348	2024832	1414485	22067036	1
TK1545-KO-RNA1207	610354	610459	106	20417	4
TK1545-KO-RNA1208	610370	2026690	1416321	85726985	1
TK1545-KO-RNA1209	610400	610618	219	17830	1
TK1545-KO-RNA1210	610413	610604	192	16803	1
TK1545-KO-RNA1211	610414	2025284	1414871	29024189	1
TK1545-KO-RNA1212	610417	2024061	1413645	34043085	1
TK1545-KO-RNA1213	610418	610513	96	19915	3
TK1545-KO-RNA1214	610434	2027407	1416974	48958890	1
TK1545-KO-RNA1215	610444	610606	163	14714	1
TK1545-KO-RNA1216	610457	610895	439	36138	1
TK1545-KO-RNA1217	610471	2025774	1415304	67609792	2
TK1545-KO-RNA1218	610487	610625	139	12512	1
TK1545-KO-RNA1219	610492	610607	116	11750	1
TK1545-KO-RNA1220	610504	610604	101	10705	1
TK1545-KO-RNA1221	610557	2027547	1416991	50203024	1
TK1545-KO-RNA1222	610562	610703	142	15702	1
TK1545-KO-RNA1223	610574	2023569	1412996	10646608	1
TK1545-KO-RNA1224	610585	610678	94	11162	1
TK1545-KO-RNA1225	610587	1820699	1210113	2943761	1
TK1545-KO-RNA1226	610593	610755	163	17052	1
TK1545-KO-RNA1227	610593	2023861	1413269	13863311	1
TK1545-KO-RNA1228	610595	2023591	1412997	11092500	1
TK1545-KO-RNA1229	610603	610725	123	13829	2
TK1545-KO-RNA1230	610620	610735	116	13891	1
TK1545-KO-RNA1231	610625	2025152	1414528	27468569	1
TK1545-KO-RNA1232	610626	2022990	1412365	4524107	1
TK1545-KO-RNA1233	610684	1862758	1252075	2983331	1
TK1545-KO-RNA1234	610689	610922	234	21911	1
TK1545-KO-RNA1235	610702	610755	54	7818	1
TK1545-KO-RNA1236	610708	610864	157	15886	1
TK1545-KO-RNA1237	610730	610809	80	20410	1
TK1545-KO-RNA1238	610733	833636	222904	581710	1
TK1545-KO-RNA1239	610755	610992	238	21132	1
TK1545-KO-RNA1240	610759	610920	162	28837	2
TK1545-KO-RNA1241	610766	2023677	1412912	12006057	1
TK1545-KO-RNA1242	610851	610992	142	13474	2
TK1545-KO-RNA1243	610853	610959	107	22522	7
TK1545-KO-RNA1244	610869	611036	168	14564	1
TK1545-KO-RNA1245	610879	780904	170026	304103	1
TK1545-KO-RNA1246	610974	611155	182	18379	1
TK1545-KO-RNA1247	610986	611092	107	11727	2
TK1545-KO-RNA1248	610993	2025569	1414577	31341675	1
TK1545-KO-RNA1249	611006	611108	103	9787	1
TK1545-KO-RNA1250	611010	2025277	1414268	29350359	1
TK1545-KO-RNA1251	611012	611115	104	9895	1
TK1545-KO-RNA1252	611014	611100	87	9535	1
TK1545-KO-RNA1253	611014	2026246	1415233	38482012	1
TK1545-KO-RNA1254	611023	611172	150	13524	2
TK1545-KO-RNA1255	611030	1256156	645127	1484443	1
TK1545-KO-RNA1256	611065	2023426	1412362	9226239	1
TK1545-KO-RNA1257	611091	2025124	1414034	26882196	1
TK1545-KO-RNA1258	611093	2024872	1413780	22810718	1
TK1545-KO-RNA1259	611094	2027427	1416334	49534278	1
TK1545-KO-RNA1260	611123	2025152	1414030	27429536	1
TK1545-KO-RNA1261	611318	611442	125	1720	1
TK1545-KO-RNA1262	611372	2024309	1412938	18724195	1
TK1545-KO-RNA1263	611437	611533	97	1899	1
TK1545-KO-RNA1264	611534	611608	75	1457	2
TK1545-KO-RNA1265	611536	611592	57	2562	7
TK1545-KO-RNA1266	611549	611755	207	2596	1
TK1545-KO-RNA1267	611560	611730	171	4397	2
TK1545-KO-RNA1268	611564	611644	81	1376	2
TK1545-KO-RNA1269	611621	611723	103	1216	1
TK1545-KO-RNA1270	611745	2024937	1413193	23210854	1
TK1545-KO-RNA1271	611813	611895	83	987	1
TK1545-KO-RNA1272	611871	612083	213	2285	1
TK1545-KO-RNA1273	611918	611980	63	2079	1
TK1545-KO-RNA1274	611933	612010	78	2253	1
TK1545-KO-RNA1275	611941	2026420	1414480	40283276	1
TK1545-KO-RNA1276	611953	612092	140	1660	1
TK1545-KO-RNA1277	611973	612126	154	1624	1
TK1545-KO-RNA1278	612027	612081	55	709	1
TK1545-KO-RNA1279	612146	612283	138	1910	1
TK1545-KO-RNA1280	612273	612374	102	1820	1
TK1545-KO-RNA1281	612368	2023726	1411359	12507189	1
TK1545-KO-RNA1282	612451	612608	158	1972	1
TK1545-KO-RNA1283	612482	612729	248	2447	1
TK1545-KO-RNA1284	612491	2026356	1413866	39899949	1
TK1545-KO-RNA1285	612572	612719	148	1505	1
TK1545-KO-RNA1286	612768	2027268	1414501	48424520	1
TK1545-KO-RNA1287	613287	613347	61	144	1
TK1545-KO-RNA1288	613607	613735	129	256	1
TK1545-KO-RNA1289	614211	2023572	1409362	10613593	1
TK1545-KO-RNA1290	614810	614911	102	669	1
TK1545-KO-RNA1291	614816	614870	55	1008	7
TK1545-KO-RNA1292	614826	615140	315	1178	1
TK1545-KO-RNA1293	615264	615322	59	389	1
TK1545-KO-RNA1294	615378	615498	121	702	1
TK1545-KO-RNA1295	615400	615711	312	1571	1
TK1545-KO-RNA1296	615948	616002	55	1130	7
TK1545-KO-RNA1297	616761	2023571	1406811	10554082	1
TK1545-KO-RNA1298	621184	621267	84	846	1
TK1545-KO-RNA1299	621408	2023184	1401777	7021138	1
TK1545-KO-RNA1300	621589	621738	150	851	1
TK1545-KO-RNA1301	622038	2025705	1403668	33169024	1
TK1545-KO-RNA1302	622529	622661	133	2393	1
TK1545-KO-RNA1303	622560	2023843	1401284	13884811	1
TK1545-KO-RNA1304	622562	622711	150	1307	1
TK1545-KO-RNA1305	622599	622660	62	690	1
TK1545-KO-RNA1306	622661	878992	256332	587460	1
TK1545-KO-RNA1307	622668	622877	210	1391	1
TK1545-KO-RNA1308	622710	622774	65	566	1
TK1545-KO-RNA1309	622715	622816	102	761	1
TK1545-KO-RNA1310	622715	622867	153	2106	1
TK1545-KO-RNA1311	622748	2023586	1400839	10976798	1
TK1545-KO-RNA1312	622761	622896	136	842	1
TK1545-KO-RNA1313	622763	2023200	1400438	7151423	1
TK1545-KO-RNA1314	622938	623009	72	623	1
TK1545-KO-RNA1315	623089	1133020	509932	1042908	1
TK1545-KO-RNA1316	623304	623477	174	1115	1
TK1545-KO-RNA1317	624270	624387	118	40	1
TK1545-KO-RNA1318	624902	624970	69	70	1
TK1545-KO-RNA1319	630133	630271	139	258	1
TK1545-KO-RNA1320	630893	630958	66	227	1
TK1545-KO-RNA1321	630992	631086	95	300	1
TK1545-KO-RNA1322	631204	631271	68	189	2
TK1545-KO-RNA1323	631368	631427	60	274	2
TK1545-KO-RNA1324	634668	2025766	1391099	33472708	1
TK1545-KO-RNA1325	639348	639492	145	193	1
TK1545-KO-RNA1326	639673	2025978	1386306	36393708	1
TK1545-KO-RNA1327	640159	640284	126	36	1
TK1545-KO-RNA1328	640892	641089	198	231	1
TK1545-KO-RNA1329	643217	643376	160	416	1
TK1545-KO-RNA1330	643618	643686	69	288	3
TK1545-KO-RNA1331	644007	644105	99	294	1
TK1545-KO-RNA1332	644746	644844	99	571	1
TK1545-KO-RNA1333	645538	645733	196	533	1
TK1545-KO-RNA1334	645710	645763	54	298	1
TK1545-KO-RNA1335	646018	646125	108	353	1
TK1545-KO-RNA1336	646254	646329	76	294	1
TK1545-KO-RNA1337	647587	647713	127	71	1
TK1545-KO-RNA1338	647833	647951	119	127	1
TK1545-KO-RNA1339	647887	2025277	1377391	28896832	1
TK1545-KO-RNA1340	648291	648379	89	169	1
TK1545-KO-RNA1341	648986	2026663	1377678	42270540	1
TK1545-KO-RNA1342	649107	649198	92	126	1
TK1545-KO-RNA1343	649725	649808	84	162	3
TK1545-KO-RNA1344	654069	654219	151	645	1
TK1545-KO-RNA1345	654170	2025744	1371575	33628017	1
TK1545-KO-RNA1346	654189	654278	90	398	1
TK1545-KO-RNA1347	654205	2025042	1370838	25310681	1
TK1545-KO-RNA1348	654533	654619	87	983	1
TK1545-KO-RNA1349	654552	654724	173	1418	1
TK1545-KO-RNA1350	654554	654625	72	742	1
TK1545-KO-RNA1351	654581	2023716	1369136	12406288	1
TK1545-KO-RNA1352	654686	2027549	1372864	50167419	1
TK1545-KO-RNA1353	655732	655835	104	9	1
TK1545-KO-RNA1354	656100	656153	54	67	1
TK1545-KO-RNA1355	660365	660540	176	58	1
TK1545-KO-RNA1356	660981	661043	63	59	1
TK1545-KO-RNA1357	662335	2026479	1364145	40786023	1
TK1545-KO-RNA1358	663546	663714	169	127	1
TK1545-KO-RNA1359	666367	666435	69	100	1
TK1545-KO-RNA1360	666980	667045	66	31	1
TK1545-KO-RNA1361	673631	673711	81	66	1
TK1545-KO-RNA1362	673736	673897	162	101	1
TK1545-KO-RNA1363	674721	674879	159	33	1
TK1545-KO-RNA1364	675316	675459	144	441	1
TK1545-KO-RNA1365	675336	675393	58	225	1
TK1545-KO-RNA1366	675340	675469	130	388	1
TK1545-KO-RNA1367	675345	675402	58	467	3
TK1545-KO-RNA1368	676150	676309	160	49	1
TK1545-KO-RNA1369	678152	678236	85	321	1
TK1545-KO-RNA1370	678289	678441	153	466	1
TK1545-KO-RNA1371	678438	678491	54	239	1
TK1545-KO-RNA1372	678553	678635	83	319	1
TK1545-KO-RNA1373	678661	678780	120	313	1
TK1545-KO-RNA1374	680831	680914	84	1466	1
TK1545-KO-RNA1375	680908	681139	232	3324	1
TK1545-KO-RNA1376	680989	681085	97	1594	1
TK1545-KO-RNA1377	681011	681130	120	1982	1
TK1545-KO-RNA1378	681109	2026288	1345180	38478803	1
TK1545-KO-RNA1379	681126	681314	189	2255	2
TK1545-KO-RNA1380	681152	681210	59	1102	1
TK1545-KO-RNA1381	681184	681325	142	1545	1
TK1545-KO-RNA1382	681247	2023809	1342563	13652672	1
TK1545-KO-RNA1383	682650	682750	101	48	1
TK1545-KO-RNA1384	684929	685003	75	88	1
TK1545-KO-RNA1385	686139	1101026	414888	942542	1
TK1545-KO-RNA1386	687150	687253	104	152	2
TK1545-KO-RNA1387	689789	2025249	1335461	28470116	1
TK1545-KO-RNA1388	690729	690875	147	422	1
TK1545-KO-RNA1389	690903	691069	167	505	2
TK1545-KO-RNA1390	690948	691049	102	369	1
TK1545-KO-RNA1391	690949	691039	91	346	1
TK1545-KO-RNA1392	690997	691070	74	321	1
TK1545-KO-RNA1393	691171	691302	132	495	1
TK1545-KO-RNA1394	692988	693071	84	137	2
TK1545-KO-RNA1395	693543	693642	100	124	1
TK1545-KO-RNA1396	693797	694053	257	226	1
TK1545-KO-RNA1397	693849	693922	74	92	1
TK1545-KO-RNA1398	694662	694781	120	145	1
TK1545-KO-RNA1399	695573	2026067	1330495	36921760	1
TK1545-KO-RNA1400	695847	695907	61	132	1
TK1545-KO-RNA1401	696732	696855	124	380	1
TK1545-KO-RNA1402	697072	697152	81	282	1
TK1545-KO-RNA1403	697698	697805	108	323	1
TK1545-KO-RNA1404	697730	697806	77	223	1
TK1545-KO-RNA1405	697782	697908	127	729	2
TK1545-KO-RNA1406	697794	697919	126	767	1
TK1545-KO-RNA1407	697863	698008	146	423	1
TK1545-KO-RNA1408	698981	699049	69	265	1
TK1545-KO-RNA1409	699320	1327904	628585	1573971	1
TK1545-KO-RNA1410	699727	699780	54	162	1
TK1545-KO-RNA1411	699829	700042	214	455	1
TK1545-KO-RNA1412	699919	700094	176	426	1
TK1545-KO-RNA1413	699980	700087	108	327	1
TK1545-KO-RNA1414	700025	700090	66	440	2
TK1545-KO-RNA1415	700033	700160	128	314	1
TK1545-KO-RNA1416	700086	700180	95	283	1
TK1545-KO-RNA1417	700097	700239	143	714	2
TK1545-KO-RNA1418	701114	701395	282	773	1
TK1545-KO-RNA1419	701125	701363	239	606	1
TK1545-KO-RNA1420	701664	2025187	1323524	27309562	1
TK1545-KO-RNA1421	701869	702010	142	84	1
TK1545-KO-RNA1422	704875	704972	98	60	1
TK1545-KO-RNA1423	705317	705445	129	116	1
TK1545-KO-RNA1424	707093	707164	72	237	1
TK1545-KO-RNA1425	707877	2026926	1319050	45024826	1
TK1545-KO-RNA1426	708160	708315	156	378	1
TK1545-KO-RNA1427	709230	709354	125	330	1
TK1545-KO-RNA1428	709558	709621	64	297	1
TK1545-KO-RNA1429	709607	2027475	1317869	48866306	1
TK1545-KO-RNA1430	709784	709849	66	335	1
TK1545-KO-RNA1431	710171	710236	66	321	1
TK1545-KO-RNA1432	710685	710780	96	522	1
TK1545-KO-RNA1433	710891	1455502	744612	1975696	1
TK1545-KO-RNA1434	710957	711010	54	271	1
TK1545-KO-RNA1435	711420	711500	81	297	1
TK1545-KO-RNA1436	712372	712552	181	109	1
TK1545-KO-RNA1437	713329	713447	119	98	1
TK1545-KO-RNA1438	713666	713842	177	696	1
TK1545-KO-RNA1439	713675	713768	94	457	1
TK1545-KO-RNA1440	713725	713809	85	558	1
TK1545-KO-RNA1441	714000	714221	222	1173	1
TK1545-KO-RNA1442	714180	714305	126	934	1
TK1545-KO-RNA1443	714366	714524	159	823	1
TK1545-KO-RNA1444	714552	714632	81	533	1
TK1545-KO-RNA1445	714641	714708	68	579	2
TK1545-KO-RNA1446	715631	715864	234	428	1
TK1545-KO-RNA1447	716061	716172	112	286	1
TK1545-KO-RNA1448	716084	716175	92	249	1
TK1545-KO-RNA1449	718078	718154	77	85	1
TK1545-KO-RNA1450	719366	2024058	1304693	16692425	1
TK1545-KO-RNA1451	722726	722818	93	1242	1
TK1545-KO-RNA1452	722736	722803	68	1052	1
TK1545-KO-RNA1453	722793	722923	131	2326	1
TK1545-KO-RNA1454	722806	722871	66	843	1
TK1545-KO-RNA1455	723006	723107	102	675	1
TK1545-KO-RNA1456	723014	723104	91	561	2
TK1545-KO-RNA1457	724872	724969	98	314	1
TK1545-KO-RNA1458	726635	726694	60	100	1
TK1545-KO-RNA1459	731361	731420	60	31	1
TK1545-KO-RNA1460	732011	732088	78	55	1
TK1545-KO-RNA1461	732408	732584	177	157	1
TK1545-KO-RNA1462	732413	732469	57	87	1
TK1545-KO-RNA1463	732907	733048	142	99	1
TK1545-KO-RNA1464	737334	737387	54	44	1
TK1545-KO-RNA1465	737579	737638	60	224	2
TK1545-KO-RNA1466	737999	738109	111	417	1
TK1545-KO-RNA1467	738119	738264	146	589	1
TK1545-KO-RNA1468	738307	738403	97	360	1
TK1545-KO-RNA1469	738532	738624	93	1127	2
TK1545-KO-RNA1470	738779	739027	249	999	1
TK1545-KO-RNA1471	738854	739099	246	1591	2
TK1545-KO-RNA1472	739180	739317	138	577	1
TK1545-KO-RNA1473	739356	739415	60	452	1
TK1545-KO-RNA1474	740229	740326	98	466	1
TK1545-KO-RNA1475	746126	782268	36143	313202	1
TK1545-KO-RNA1476	746741	746806	66	101	1
TK1545-KO-RNA1477	746831	746909	79	115	1
TK1545-KO-RNA1478	747632	747802	171	134	1
TK1545-KO-RNA1479	749419	749601	183	172	1
TK1545-KO-RNA1480	749905	750020	116	264	1
TK1545-KO-RNA1481	749929	750021	93	458	1
TK1545-KO-RNA1482	749930	749983	54	160	1
TK1545-KO-RNA1483	750552	750713	162	499	1
TK1545-KO-RNA1484	750642	750996	355	1124	1
TK1545-KO-RNA1485	750729	750830	102	405	1
TK1545-KO-RNA1486	750732	750854	123	468	1
TK1545-KO-RNA1487	753158	2023914	1270757	15072689	1
TK1545-KO-RNA1488	753175	753525	351	9839	1
TK1545-KO-RNA1489	753179	753618	440	12125	1
TK1545-KO-RNA1490	753187	753253	67	2952	1
TK1545-KO-RNA1491	753198	753356	159	11914	2
TK1545-KO-RNA1492	753201	753314	114	10070	1
TK1545-KO-RNA1493	753201	753284	84	7226	1
TK1545-KO-RNA1494	753203	1522686	769484	1990185	1
TK1545-KO-RNA1495	753204	753276	73	3385	1
TK1545-KO-RNA1496	753215	753361	147	11409	2
TK1545-KO-RNA1497	753216	753585	370	10001	1
TK1545-KO-RNA1498	753265	753369	105	4314	1
TK1545-KO-RNA1499	753289	753360	72	3766	2
TK1545-KO-RNA1500	753304	753447	144	4548	1
TK1545-KO-RNA1501	753328	753385	58	2830	1
TK1545-KO-RNA1502	753366	2026335	1272970	39600564	1
TK1545-KO-RNA1503	753447	2024842	1271396	22086330	1
TK1545-KO-RNA1504	753450	2023815	1270366	13400604	1
TK1545-KO-RNA1505	753459	753707	249	6237	1
TK1545-KO-RNA1506	753555	753626	72	2660	1
TK1545-KO-RNA1507	753637	753735	99	6166	7
TK1545-KO-RNA1508	753657	753883	227	5973	1
TK1545-KO-RNA1509	753660	753772	113	3339	1
TK1545-KO-RNA1510	753667	753749	83	2733	1
TK1545-KO-RNA1511	753685	753773	89	2854	2
TK1545-KO-RNA1512	753782	753862	81	2985	1
TK1545-KO-RNA1513	753856	2025830	1271975	34469144	1
TK1545-KO-RNA1514	753873	2025625	1271753	31991906	1
TK1545-KO-RNA1515	753883	754094	212	3674	1
TK1545-KO-RNA1516	753890	753979	90	2058	1
TK1545-KO-RNA1517	753913	754017	105	1901	1
TK1545-KO-RNA1518	753917	754000	84	1780	2
TK1545-KO-RNA1519	753918	754062	145	5175	1
TK1545-KO-RNA1520	753949	754141	193	2339	1
TK1545-KO-RNA1521	754080	2024206	1270127	18306013	1
TK1545-KO-RNA1522	754259	754312	54	945	2
TK1545-KO-RNA1523	754296	754376	81	1353	1
TK1545-KO-RNA1524	754348	754488	141	1208	1
TK1545-KO-RNA1525	754472	754603	132	1127	1
TK1545-KO-RNA1526	754772	754885	114	842	1
TK1545-KO-RNA1527	754787	754867	81	724	1
TK1545-KO-RNA1528	754866	755051	186	976	1
TK1545-KO-RNA1529	755159	755294	136	565	1
TK1545-KO-RNA1530	756477	802273	45797	307418	1
TK1545-KO-RNA1531	756904	756961	58	188	6
TK1545-KO-RNA1532	757048	757107	60	333	2
TK1545-KO-RNA1533	758916	1813692	1054777	2689244	1
TK1545-KO-RNA1534	759000	759106	107	1649	3
TK1545-KO-RNA1535	759259	2027122	1267864	46995156	1
TK1545-KO-RNA1536	759273	759373	101	1439	3
TK1545-KO-RNA1537	762605	762679	75	74	1
TK1545-KO-RNA1538	764295	764535	241	1017	1
TK1545-KO-RNA1539	764484	1333451	568968	1497228	1
TK1545-KO-RNA1540	764513	2025256	1260744	57211458	2
TK1545-KO-RNA1541	764972	765064	93	1465	4
TK1545-KO-RNA1542	764979	765076	98	791	1
TK1545-KO-RNA1543	765620	765803	184	2478	1
TK1545-KO-RNA1544	765750	765857	108	4656	2
TK1545-KO-RNA1545	765756	2024656	1258901	19474741	1
TK1545-KO-RNA1546	765893	2023253	1257361	7162429	1
TK1545-KO-RNA1547	765915	2023172	1257258	6770327	1
TK1545-KO-RNA1548	765970	2025278	1259309	28740698	1
TK1545-KO-RNA1549	768590	768671	82	382	2
TK1545-KO-RNA1550	768887	1255888	487002	1226317	1
TK1545-KO-RNA1551	768999	1666877	897879	2366928	1
TK1545-KO-RNA1552	769735	769837	103	508	1
TK1545-KO-RNA1553	769843	769974	132	414	1
TK1545-KO-RNA1554	769995	770072	78	208	1
TK1545-KO-RNA1555	771289	771341	53	454	1
TK1545-KO-RNA1556	771378	771527	150	884	1
TK1545-KO-RNA1557	771422	771551	130	883	1
TK1545-KO-RNA1558	771542	771771	230	766	1
TK1545-KO-RNA1559	771547	771710	164	818	1
TK1545-KO-RNA1560	771627	771770	144	475	1
TK1545-KO-RNA1561	772986	773164	179	51	1
TK1545-KO-RNA1562	773938	773993	56	59	1
TK1545-KO-RNA1563	774754	774832	79	34	1
TK1545-KO-RNA1564	775367	775521	155	71	1
TK1545-KO-RNA1565	778348	778520	173	179	1
TK1545-KO-RNA1566	778807	778967	161	373	1
TK1545-KO-RNA1567	779825	779886	62	307	1
TK1545-KO-RNA1568	779842	779958	117	404	1
TK1545-KO-RNA1569	779992	780072	81	300	1
TK1545-KO-RNA1570	780420	780530	111	24181	107
TK1545-KO-RNA1571	780420	780643	224	26796	2
TK1545-KO-RNA1572	780422	2026683	1246262	42300158	2
TK1545-KO-RNA1573	780424	780573	150	37645	2
TK1545-KO-RNA1574	780439	1166933	386495	994973	1
TK1545-KO-RNA1575	780444	2022901	1242458	3519851	1
TK1545-KO-RNA1576	780486	2026277	1245792	38073689	1
TK1545-KO-RNA1577	780512	780947	436	57624	2
TK1545-KO-RNA1578	780514	780642	129	17778	1
TK1545-KO-RNA1579	780527	780667	141	20369	2
TK1545-KO-RNA1580	780571	780725	155	23616	1
TK1545-KO-RNA1581	780599	780685	87	13961	1
TK1545-KO-RNA1582	780605	1333605	553001	1461298	1
TK1545-KO-RNA1583	780614	780685	72	13046	1
TK1545-KO-RNA1584	780633	780734	102	17380	1
TK1545-KO-RNA1585	780643	2026788	1246146	43372808	1
TK1545-KO-RNA1586	780665	780847	183	28111	1
TK1545-KO-RNA1587	780711	780779	69	14600	3
TK1545-KO-RNA1588	780713	780874	162	25325	1
TK1545-KO-RNA1589	780714	780794	81	32130	5
TK1545-KO-RNA1590	780731	2026696	1245966	85211289	1
TK1545-KO-RNA1591	780733	780831	99	18673	1
TK1545-KO-RNA1592	780733	780926	194	33007	1
TK1545-KO-RNA1593	780739	780838	100	37102	1
TK1545-KO-RNA1594	780754	2027547	1246794	49246865	1
TK1545-KO-RNA1595	780762	780827	66	14113	1
TK1545-KO-RNA1596	780763	2023756	1242994	12790433	2
TK1545-KO-RNA1597	780767	780994	228	41019	1
TK1545-KO-RNA1598	780785	780982	198	34721	1
TK1545-KO-RNA1599	780794	2023564	1242771	10313744	1
TK1545-KO-RNA1600	780808	780878	71	28691	1
TK1545-KO-RNA1601	780825	780965	141	26854	2
TK1545-KO-RNA1602	780861	2025185	1244325	27436731	1
TK1545-KO-RNA1603	780862	780954	93	41929	1
TK1545-KO-RNA1604	780872	780981	110	24154	1
TK1545-KO-RNA1605	780886	2026466	1245581	40547681	1
TK1545-KO-RNA1606	780896	780955	60	16522	1
TK1545-KO-RNA1607	780900	2023448	1242549	9182340	1
TK1545-KO-RNA1608	780907	781058	152	33922	1
TK1545-KO-RNA1609	780909	2024071	1243163	16894091	1
TK1545-KO-RNA1610	780912	780980	69	18626	1
TK1545-KO-RNA1611	780916	1255782	474867	1144940	1
TK1545-KO-RNA1612	780923	2024792	1243870	21234877	1
TK1545-KO-RNA1613	780929	780995	67	21761	2
TK1545-KO-RNA1614	780941	2023850	1242910	13497806	1
TK1545-KO-RNA1615	780948	2027009	1246062	91774555	1
TK1545-KO-RNA1616	780956	781090	135	61981	3
TK1545-KO-RNA1617	780965	781084	120	56357	3
TK1545-KO-RNA1618	780965	781075	111	26952	1
TK1545-KO-RNA1619	780982	782254	1273	185353	1
TK1545-KO-RNA1620	780991	781059	69	22143	1
TK1545-KO-RNA1621	780991	2024647	1243657	19080595	1
TK1545-KO-RNA1622	780991	781098	108	26640	1
TK1545-KO-RNA1623	780992	2023204	1242213	6861558	1
TK1545-KO-RNA1624	781005	781076	72	20764	2
TK1545-KO-RNA1625	781011	781091	81	21346	1
TK1545-KO-RNA1626	781011	781067	57	19341	1
TK1545-KO-RNA1627	781014	781124	111	26524	1
TK1545-KO-RNA1628	781017	781214	198	84787	4
TK1545-KO-RNA1629	781018	781098	81	42514	5
TK1545-KO-RNA1630	781030	781242	213	47490	1
TK1545-KO-RNA1631	781059	782166	1108	169634	1
TK1545-KO-RNA1632	781070	781279	210	87756	1
TK1545-KO-RNA1633	781073	781186	114	29239	1
TK1545-KO-RNA1634	781107	2027548	1246442	49263945	1
TK1545-KO-RNA1635	781142	2027265	1246124	96763112	2
TK1545-KO-RNA1636	781142	781237	96	56719	3
TK1545-KO-RNA1637	781156	781209	54	19893	1
TK1545-KO-RNA1638	781164	781406	243	48688	2
TK1545-KO-RNA1639	781171	781452	282	56559	2
TK1545-KO-RNA1640	781179	781313	135	32730	1
TK1545-KO-RNA1641	781204	2025872	1244669	34856069	1
TK1545-KO-RNA1642	781212	781388	177	37925	1
TK1545-KO-RNA1643	781220	781579	360	69361	1
TK1545-KO-RNA1644	781222	781588	367	70862	1
TK1545-KO-RNA1645	781227	2023689	1242463	11703766	1
TK1545-KO-RNA1646	781230	781344	115	55263	1
TK1545-KO-RNA1647	781253	781381	129	58877	2
TK1545-KO-RNA1648	781259	2025922	1244664	35117454	1
TK1545-KO-RNA1649	781270	781419	150	32913	1
TK1545-KO-RNA1650	781270	781443	174	36873	1
TK1545-KO-RNA1651	781277	781357	81	44945	2
TK1545-KO-RNA1652	781284	781364	81	39426	1
TK1545-KO-RNA1653	781284	2023850	1242567	13435689	1
TK1545-KO-RNA1654	781287	2023181	1241895	6745163	1
TK1545-KO-RNA1655	781295	781393	99	22467	1
TK1545-KO-RNA1656	781297	781494	198	42875	1
TK1545-KO-RNA1657	781299	781671	373	69780	1
TK1545-KO-RNA1658	781301	781456	156	33001	1
TK1545-KO-RNA1659	781318	781419	102	48340	12
TK1545-KO-RNA1660	781325	781570	246	49892	1
TK1545-KO-RNA1661	781345	781638	294	60171	3
TK1545-KO-RNA1662	781352	781426	75	21397	1
TK1545-KO-RNA1663	781362	781493	132	32373	1
TK1545-KO-RNA1664	781364	2023703	1242340	11911780	2
TK1545-KO-RNA1665	781367	781424	58	30303	2
TK1545-KO-RNA1666	781375	781494	120	30256	1
TK1545-KO-RNA1667	781382	781441	60	33031	37
TK1545-KO-RNA1668	781384	781499	116	29274	2
TK1545-KO-RNA1669	781389	781460	72	18143	1
TK1545-KO-RNA1670	781391	781486	96	26136	1
TK1545-KO-RNA1671	781425	782012	588	93426	1
TK1545-KO-RNA1672	781442	781642	201	44249	1
TK1545-KO-RNA1673	781456	781539	84	47312	1
TK1545-KO-RNA1674	781462	2025828	1244367	33804189	1
TK1545-KO-RNA1675	781462	781653	192	43194	1
TK1545-KO-RNA1676	781466	781528	63	20566	1
TK1545-KO-RNA1677	781466	781617	152	37159	1
TK1545-KO-RNA1678	781467	2026934	1245468	44871718	1
TK1545-KO-RNA1679	781471	2027172	1245702	47391293	1
TK1545-KO-RNA1680	781473	781662	190	84487	3
TK1545-KO-RNA1681	781473	2024672	1243200	19264420	1
TK1545-KO-RNA1682	781475	2026013	1244539	36321208	1
TK1545-KO-RNA1683	781476	2025979	1244504	71636700	1
TK1545-KO-RNA1684	781477	2025555	1244079	62198104	2
TK1545-KO-RNA1685	781477	781545	69	41101	2
TK1545-KO-RNA1686	781478	781789	312	61521	1
TK1545-KO-RNA1687	781480	1344153	562674	1452475	1
TK1545-KO-RNA1688	781481	781552	72	41684	5
TK1545-KO-RNA1689	781483	781647	165	39032	1
TK1545-KO-RNA1690	781484	781798	315	121998	4
TK1545-KO-RNA1691	781490	781561	72	42522	15
TK1545-KO-RNA1692	781492	781752	261	108732	1
TK1545-KO-RNA1693	781499	781624	126	64527	2
TK1545-KO-RNA1694	781500	781571	72	41796	130
TK1545-KO-RNA1695	781500	781760	261	107559	1
TK1545-KO-RNA1696	781503	781675	173	38297	1
TK1545-KO-RNA1697	781508	781570	63	18832	1
TK1545-KO-RNA1698	781510	781618	109	56985	1
TK1545-KO-RNA1699	781514	781678	165	35050	1
TK1545-KO-RNA1700	781525	781689	165	66062	1
TK1545-KO-RNA1701	781526	1572013	790488	1850298	1
TK1545-KO-RNA1702	781544	2027563	1246020	49927127	1
TK1545-KO-RNA1703	781558	781668	111	26065	1
TK1545-KO-RNA1704	781572	2026343	1244772	39049077	1
TK1545-KO-RNA1705	781574	781762	189	39801	1
TK1545-KO-RNA1706	781592	781685	94	24420	1
TK1545-KO-RNA1707	781594	781804	211	86023	2
TK1545-KO-RNA1708	781597	944607	163011	310566	1
TK1545-KO-RNA1709	781598	781879	282	104300	2
TK1545-KO-RNA1710	781599	781824	226	44729	1
TK1545-KO-RNA1711	781606	781713	108	28831	1
TK1545-KO-RNA1712	781615	781779	165	73592	1
TK1545-KO-RNA1713	781615	2025828	1244214	33777666	1
TK1545-KO-RNA1714	781618	2023189	1241572	6670406	1
TK1545-KO-RNA1715	781619	781717	99	53377	3
TK1545-KO-RNA1716	781620	781689	70	20302	1
TK1545-KO-RNA1717	781622	781678	57	18488	1
TK1545-KO-RNA1718	781623	782308	686	76255	1
TK1545-KO-RNA1719	781624	781776	153	68624	2
TK1545-KO-RNA1720	781628	781789	162	69424	7
TK1545-KO-RNA1721	781636	781935	300	50658	2
TK1545-KO-RNA1722	781641	781733	93	22400	1
TK1545-KO-RNA1723	781651	781725	75	36448	2
TK1545-KO-RNA1724	781651	781743	93	39917	4
TK1545-KO-RNA1725	781663	2025017	1243355	24281731	1
TK1545-KO-RNA1726	781681	2024627	1242947	18788974	1
TK1545-KO-RNA1727	781681	782103	423	56697	1
TK1545-KO-RNA1728	781698	2024657	1242960	38351033	2
TK1545-KO-RNA1729	781711	781782	72	19599	1
TK1545-KO-RNA1730	781723	781818	96	22268	1
TK1545-KO-RNA1731	781736	781940	205	34338	1
TK1545-KO-RNA1732	781738	781911	174	61179	1
TK1545-KO-RNA1733	781751	781864	114	44964	1
TK1545-KO-RNA1734	781765	781824	60	30399	1
TK1545-KO-RNA1735	781781	781963	183	27520	1
TK1545-KO-RNA1736	781781	781921	141	48531	2
TK1545-KO-RNA1737	781788	781928	141	48535	1
TK1545-KO-RNA1738	781798	781881	84	18449	1
TK1545-KO-RNA1739	781806	782024	219	30571	1
TK1545-KO-RNA1740	781816	782001	186	26720	1
TK1545-KO-RNA1741	781817	781927	111	37559	5
TK1545-KO-RNA1742	781831	2027001	1245171	46027100	1
TK1545-KO-RNA1743	781832	2022828	1240997	2879119	1
TK1545-KO-RNA1744	781849	782019	171	48212	1
TK1545-KO-RNA1745	781855	782172	318	35829	2
TK1545-KO-RNA1746	781855	781923	69	27751	2
TK1545-KO-RNA1747	781867	2023129	1241263	11638473	1
TK1545-KO-RNA1748	781872	2025656	1243785	32030494	1
TK1545-KO-RNA1749	781889	781996	108	16335	1
TK1545-KO-RNA1750	781915	782216	302	29367	2
TK1545-KO-RNA1751	781927	782001	75	11995	1
TK1545-KO-RNA1752	781928	782095	168	19544	1
TK1545-KO-RNA1753	781949	782074	126	16168	1
TK1545-KO-RNA1754	781958	2023086	1241129	4925028	1
TK1545-KO-RNA1755	781958	782181	224	23646	1
TK1545-KO-RNA1756	781960	2024218	1242259	18048314	1
TK1545-KO-RNA1757	781961	782083	123	32168	2
TK1545-KO-RNA1758	781971	782039	69	23300	2
TK1545-KO-RNA1759	781972	782073	102	27868	9
TK1545-KO-RNA1760	781981	782115	135	32726	7
TK1545-KO-RNA1761	782006	782140	135	37379	15
TK1545-KO-RNA1762	782058	2026921	1244864	44634147	1
TK1545-KO-RNA1763	782074	782163	90	11974	1
TK1545-KO-RNA1764	782097	782174	78	19321	3
TK1545-KO-RNA1765	782104	782175	72	8987	1
TK1545-KO-RNA1766	782126	782312	187	19784	2
TK1545-KO-RNA1767	782155	782310	156	15562	23
TK1545-KO-RNA1768	782223	782311	89	2328	1
TK1545-KO-RNA1769	784910	2024300	1239391	18245081	1
TK1545-KO-RNA1770	787212	787427	216	2377	1
TK1545-KO-RNA1771	787383	787541	159	1662	1
TK1545-KO-RNA1772	787493	787701	209	1394	1
TK1545-KO-RNA1773	787579	787696	118	714	1
TK1545-KO-RNA1774	788266	788329	64	86	1
TK1545-KO-RNA1775	790526	790705	180	167	1
TK1545-KO-RNA1776	791452	791688	237	434	1
TK1545-KO-RNA1777	791907	791972	66	260	1
TK1545-KO-RNA1778	791915	792038	124	791	3
TK1545-KO-RNA1779	791923	792027	105	712	3
TK1545-KO-RNA1780	791938	792024	87	585	2
TK1545-KO-RNA1781	793163	793254	92	183	1
TK1545-KO-RNA1782	793622	793814	193	611	1
TK1545-KO-RNA1783	793674	793829	156	1121	1
TK1545-KO-RNA1784	794250	794447	198	547	1
TK1545-KO-RNA1785	794529	794754	226	593	1
TK1545-KO-RNA1786	794800	794921	122	251	1
TK1545-KO-RNA1787	796326	796530	205	548	1
TK1545-KO-RNA1788	796542	796596	55	669	2
TK1545-KO-RNA1789	796898	797044	147	536	1
TK1545-KO-RNA1790	797081	797171	91	283	1
TK1545-KO-RNA1791	797345	797479	135	382	1
TK1545-KO-RNA1792	797657	797731	75	121	1
TK1545-KO-RNA1793	797987	798082	96	359	2
TK1545-KO-RNA1794	798690	798781	92	415	1
TK1545-KO-RNA1795	799060	2023441	1224382	8924651	1
TK1545-KO-RNA1796	799242	799328	87	1303	1
TK1545-KO-RNA1797	799250	799336	87	686	2
TK1545-KO-RNA1798	799610	799675	66	183	1
TK1545-KO-RNA1799	799807	799897	91	177	1
TK1545-KO-RNA1800	799859	799958	100	155	1
TK1545-KO-RNA1801	801257	801317	61	722	29
TK1545-KO-RNA1802	801258	2027567	1226310	99049749	1
TK1545-KO-RNA1803	801316	801486	171	661	2
TK1545-KO-RNA1804	801319	801395	77	453	1
TK1545-KO-RNA1805	801426	801480	55	410	1
TK1545-KO-RNA1806	801446	801504	59	312	1
TK1545-KO-RNA1807	801876	2025275	1223400	28446618	1
TK1545-KO-RNA1808	802260	802398	139	391	1
TK1545-KO-RNA1809	802509	802644	136	723	1
TK1545-KO-RNA1810	802654	802721	68	282	1
TK1545-KO-RNA1811	802860	803005	146	378	2
TK1545-KO-RNA1812	803336	803479	144	430	1
TK1545-KO-RNA1813	803658	803829	172	449	1
TK1545-KO-RNA1814	803668	803861	194	502	1
TK1545-KO-RNA1815	803688	803849	162	426	1
TK1545-KO-RNA1816	803759	803893	135	326	1
TK1545-KO-RNA1817	803866	803973	108	277	1
TK1545-KO-RNA1818	804192	804286	95	374	1
TK1545-KO-RNA1819	804913	805054	142	156	2
TK1545-KO-RNA1820	806906	806965	60	98	1
TK1545-KO-RNA1821	807278	807334	57	125	1
TK1545-KO-RNA1822	807322	2026920	1219599	44570834	1
TK1545-KO-RNA1823	807650	807787	138	210	1
TK1545-KO-RNA1824	807914	808096	183	215	1
TK1545-KO-RNA1825	809303	809386	84	172	1
TK1545-KO-RNA1826	811382	811659	278	183	1
TK1545-KO-RNA1827	811389	2024305	1212917	18004083	1
TK1545-KO-RNA1828	812119	812214	96	112	1
TK1545-KO-RNA1829	812163	812306	144	140	1
TK1545-KO-RNA1830	817625	817836	212	226	1
TK1545-KO-RNA1831	818380	818476	97	107	1
TK1545-KO-RNA1832	819338	819424	87	185	1
TK1545-KO-RNA1833	819592	819676	85	419	2
TK1545-KO-RNA1834	820415	820595	181	1598	1
TK1545-KO-RNA1835	820453	820653	201	4272	7
TK1545-KO-RNA1836	820458	820538	81	826	1
TK1545-KO-RNA1837	820516	820629	114	1348	1
TK1545-KO-RNA1838	820629	820694	66	1257	1
TK1545-KO-RNA1839	820886	821023	138	4633	2
TK1545-KO-RNA1840	820893	821040	148	2341	1
TK1545-KO-RNA1841	820928	821011	84	1659	1
TK1545-KO-RNA1842	821252	821359	108	2338	1
TK1545-KO-RNA1843	821322	821543	222	1899	2
TK1545-KO-RNA1844	821402	821634	233	2045	1
TK1545-KO-RNA1845	821440	821493	54	663	1
TK1545-KO-RNA1846	821463	821650	188	1921	1
TK1545-KO-RNA1847	821553	821605	53	832	1
TK1545-KO-RNA1848	821811	821876	66	1102	1
TK1545-KO-RNA1849	821849	821989	141	1587	1
TK1545-KO-RNA1850	822128	822250	123	1511	1
TK1545-KO-RNA1851	822186	822289	104	3698	2
TK1545-KO-RNA1852	822194	822289	96	3561	2
TK1545-KO-RNA1853	822203	1203506	381304	1423075	4
TK1545-KO-RNA1854	822220	822283	64	1412	4
TK1545-KO-RNA1855	822221	822302	82	1859	1
TK1545-KO-RNA1856	822227	822289	63	2880	3
TK1545-KO-RNA1857	822249	2023871	1201623	13599469	1
TK1545-KO-RNA1858	822271	822394	124	2074	1
TK1545-KO-RNA1859	822288	2027614	1205327	49899702	1
TK1545-KO-RNA1860	822953	823056	104	52	2
TK1545-KO-RNA1861	823642	823701	60	398	1
TK1545-KO-RNA1862	825009	825065	57	241	1
TK1545-KO-RNA1863	825070	825194	125	373	2
TK1545-KO-RNA1864	829068	829189	122	67	1
TK1545-KO-RNA1865	830904	831046	143	198	1
TK1545-KO-RNA1866	831118	831197	80	197	1
TK1545-KO-RNA1867	831541	831733	193	349	1
TK1545-KO-RNA1868	832067	832133	67	225	1
TK1545-KO-RNA1869	832247	832300	54	163	1
TK1545-KO-RNA1870	832290	832393	104	182	1
TK1545-KO-RNA1871	832457	832584	128	101	1
TK1545-KO-RNA1872	833594	833665	72	37	1
TK1545-KO-RNA1873	833666	833732	67	26	1
TK1545-KO-RNA1874	833936	834007	72	39	1
TK1545-KO-RNA1875	834008	834075	68	55	19
TK1545-KO-RNA1876	834068	994921	160854	316593	1
TK1545-KO-RNA1877	834068	834193	126	60	1
TK1545-KO-RNA1878	834077	834143	67	49	6
TK1545-KO-RNA1879	834210	834279	70	91	1
TK1545-KO-RNA1880	834280	834484	205	169	1
TK1545-KO-RNA1881	835436	835502	67	14	1
TK1545-KO-RNA1882	836041	836094	54	393	1
TK1545-KO-RNA1883	836067	836307	241	913	1
TK1545-KO-RNA1884	836338	2022935	1186598	3484957	1
TK1545-KO-RNA1885	836471	836530	60	676	1
TK1545-KO-RNA1886	836698	836802	105	1674	1
TK1545-KO-RNA1887	836775	836891	117	853	1
TK1545-KO-RNA1888	842974	843041	68	64	1
TK1545-KO-RNA1889	843144	843209	66	93	1
TK1545-KO-RNA1890	843492	843558	67	100	1
TK1545-KO-RNA1891	844573	844628	56	160	1
TK1545-KO-RNA1892	844743	844906	164	569	1
TK1545-KO-RNA1893	844953	845185	233	972	1
TK1545-KO-RNA1894	845046	845177	132	647	1
TK1545-KO-RNA1895	845143	845201	59	427	1
TK1545-KO-RNA1896	845174	845242	69	504	1
TK1545-KO-RNA1897	846893	847015	123	103	1
TK1545-KO-RNA1898	847499	847555	57	93	1
TK1545-KO-RNA1899	848582	848647	66	59	1
TK1545-KO-RNA1900	850727	2025106	1174380	26435029	1
TK1545-KO-RNA1901	851201	851302	102	2883	1
TK1545-KO-RNA1902	851208	851303	96	2820	3
TK1545-KO-RNA1903	851364	851447	84	2624	1
TK1545-KO-RNA1904	851405	851581	177	2886	1
TK1545-KO-RNA1905	851999	2022900	1170902	3139452	1
TK1545-KO-RNA1906	852407	2024123	1171717	16961072	1
TK1545-KO-RNA1907	852603	852656	54	121	1
TK1545-KO-RNA1908	853681	853752	72	181	1
TK1545-KO-RNA1909	854453	2026515	1172063	40646497	1
TK1545-KO-RNA1910	854922	2025688	1170767	31842988	1
TK1545-KO-RNA1911	855036	2023079	1168044	4770272	1
TK1545-KO-RNA1912	855086	855283	198	907	1
TK1545-KO-RNA1913	855266	855382	117	582	1
TK1545-KO-RNA1914	855266	855354	89	493	1
TK1545-KO-RNA1915	855797	855873	77	296	1
TK1545-KO-RNA1916	858626	858724	99	388	2
TK1545-KO-RNA1917	858630	2022997	1164368	3909822	1
TK1545-KO-RNA1918	858746	2024889	1166144	22286608	1
TK1545-KO-RNA1919	860034	2023757	1163724	12320431	1
TK1545-KO-RNA1920	860516	860587	72	251	2
TK1545-KO-RNA1921	860605	860670	66	274	2
TK1545-KO-RNA1922	860646	860808	163	481	1
TK1545-KO-RNA1923	861444	861529	86	448	1
TK1545-KO-RNA1924	861724	861828	105	469	1
TK1545-KO-RNA1925	862837	862902	66	762	1
TK1545-KO-RNA1926	863157	863356	200	2259	1
TK1545-KO-RNA1927	863283	863522	240	2379	1
TK1545-KO-RNA1928	863411	863568	158	1789	1
TK1545-KO-RNA1929	865515	865595	81	1904	1
TK1545-KO-RNA1930	865733	2026478	1160746	40603326	1
TK1545-KO-RNA1931	865734	2023847	1158114	13165079	1
TK1545-KO-RNA1932	865784	866002	219	5143	1
TK1545-KO-RNA1933	865837	866003	167	4193	1
TK1545-KO-RNA1934	865883	866355	473	7697	1
TK1545-KO-RNA1935	865970	866033	64	2593	1
TK1545-KO-RNA1936	865971	2026292	1160322	38503425	1
TK1545-KO-RNA1937	866032	2023571	1157540	10018682	1
TK1545-KO-RNA1938	866036	866113	78	2448	1
TK1545-KO-RNA1939	866037	866361	325	4940	1
TK1545-KO-RNA1940	866056	866157	102	2946	1
TK1545-KO-RNA1941	866073	2027546	1161474	48895454	1
TK1545-KO-RNA1942	866122	2023738	1157617	11988947	1
TK1545-KO-RNA1943	866182	866360	179	2262	1
TK1545-KO-RNA1944	866230	866361	132	2497	2
TK1545-KO-RNA1945	866516	866685	170	121	1
TK1545-KO-RNA1946	866627	866703	77	115	1
TK1545-KO-RNA1947	867688	867775	88	131	2
TK1545-KO-RNA1948	867725	867796	72	107	1
TK1545-KO-RNA1949	867857	1801353	933497	2261501	1
TK1545-KO-RNA1950	876439	876491	53	242	1
TK1545-KO-RNA1951	876439	876536	98	323	1
TK1545-KO-RNA1952	877307	2027545	1150239	48882678	1
TK1545-KO-RNA1953	877471	877583	113	426	1
TK1545-KO-RNA1954	877803	1869351	991549	2381173	1
TK1545-KO-RNA1955	877991	2025259	1147269	28051053	1
TK1545-KO-RNA1956	878147	878328	182	916	1
TK1545-KO-RNA1957	878239	878328	90	1438	1
TK1545-KO-RNA1958	878964	879101	138	2768	1
TK1545-KO-RNA1959	878987	2023815	1144829	13127722	1
TK1545-KO-RNA1960	878990	879157	168	3895	1
TK1545-KO-RNA1961	878992	879082	91	2662	1
TK1545-KO-RNA1962	878992	879106	115	3117	1
TK1545-KO-RNA1963	879007	879142	136	3583	1
TK1545-KO-RNA1964	879012	879125	114	2835	1
TK1545-KO-RNA1965	879013	879114	102	2764	1
TK1545-KO-RNA1966	879023	1945729	1066707	2592072	1
TK1545-KO-RNA1967	879030	879110	81	4946	2
TK1545-KO-RNA1968	879042	879097	56	1875	1
TK1545-KO-RNA1969	879044	2026307	1147264	76864523	1
TK1545-KO-RNA1970	879047	879163	117	2861	1
TK1545-KO-RNA1971	879059	879112	54	1984	1
TK1545-KO-RNA1972	879059	879142	84	4929	2
TK1545-KO-RNA1973	879067	879153	87	5012	3
TK1545-KO-RNA1974	879075	879161	87	4703	1
TK1545-KO-RNA1975	879075	879131	57	4166	1
TK1545-KO-RNA1976	879075	879149	75	2207	1
TK1545-KO-RNA1977	879078	879170	93	4708	2
TK1545-KO-RNA1978	879084	879143	60	3990	10
TK1545-KO-RNA1979	879096	879173	78	2016	1
TK1545-KO-RNA1980	879105	879242	138	2673	1
TK1545-KO-RNA1981	879108	879167	60	3498	12
TK1545-KO-RNA1982	879126	879240	115	2267	1
TK1545-KO-RNA1983	879133	879256	124	2169	1
TK1545-KO-RNA1984	879224	879290	67	1897	7
TK1545-KO-RNA1985	879230	879282	53	1737	27
TK1545-KO-RNA1986	879231	2023909	1144679	14355257	1
TK1545-KO-RNA1987	879240	879301	62	650	1
TK1545-KO-RNA1988	880863	881018	156	111	1
TK1545-KO-RNA1989	882725	882939	215	163	1
TK1545-KO-RNA1990	882960	883127	168	119	1
TK1545-KO-RNA1991	883962	884090	129	139	1
TK1545-KO-RNA1992	888788	888947	160	75	1
TK1545-KO-RNA1993	892110	892268	159	369	1
TK1545-KO-RNA1994	892178	892263	86	265	1
TK1545-KO-RNA1995	892308	892475	168	1045	2
TK1545-KO-RNA1996	892370	892433	64	551	1
TK1545-KO-RNA1997	892378	892441	64	514	2
TK1545-KO-RNA1998	892466	892528	63	216	2
TK1545-KO-RNA1999	892690	892895	206	462	1
[truncated: 7,745 more rows]

## Sheet: (ii) tk1545KO Table 2
index	Circular junction position		length	Number of aligned reads	Number of junction reads
TK1545-KO-RNA1570	780420	780530	111	24181	107
TK1545-KO-RNA1694	781500	781571	72	41796	130
TK1545-KO-RNA4949	1945728	1945789	62	1680	987
TK1545-KO-RNA5062	2022801	2024382	1582	30650056	4733
TK1545-KO-RNA5448	2023158	2023466	309	7420439	121
TK1545-KO-RNA5452	2023159	2023318	160	4167411	164
TK1545-KO-RNA5455	2023159	2023278	120	3745746	118
TK1545-KO-RNA5486	2023166	2023285	120	3358529	1859
TK1545-KO-RNA5489	2023167	2023474	308	7002129	108
TK1545-KO-RNA5848	2023498	2023756	259	7139399	138
TK1545-KO-RNA5854	2023499	2023701	203	5557222	290
TK1545-KO-RNA5889	2023523	2023703	181	5683768	167
TK1545-KO-RNA5994	2023551	2023719	169	5998765	105
TK1545-KO-RNA6018	2023556	2024932	1377	27380367	111
TK1545-KO-RNA6022	2023557	2023759	203	6775275	104
TK1545-KO-RNA6028	2023558	2023802	245	7668440	174
TK1545-KO-RNA6048	2023563	2023757	195	6729071	120
TK1545-KO-RNA6081	2023571	2023756	186	6340623	157
TK1545-KO-RNA6118	2023583	2023756	174	5506938	289
TK1545-KO-RNA6119	2023584	2023703	120	4118461	287
TK1545-KO-RNA6139	2023590	2023763	174	5362978	436
TK1545-KO-RNA6157	2023605	2023759	155	5007728	144
TK1545-KO-RNA6199	2023629	2023731	103	3642295	182
TK1545-KO-RNA6202	2023633	2023759	127	4042965	221
TK1545-KO-RNA6381	2023722	2023831	110	3573650	831
TK1545-KO-RNA6422	2023740	2023855	116	3579964	103
TK1545-KO-RNA6445	2023743	2023804	62	2761320	1316
TK1545-KO-RNA6572	2023811	2024009	199	6605063	526
TK1545-KO-RNA6686	2023890	2025088	1199	24324470	206
TK1545-KO-RNA6870	2024018	2025830	1813	37957589	157
TK1545-KO-RNA6873	2024020	2024164	145	5400941	172
TK1545-KO-RNA6877	2024021	2024156	136	4563413	204
TK1545-KO-RNA6897	2024029	2024155	127	4343241	572
TK1545-KO-RNA7125	2024584	2027631	3048	62941809	205719
TK1545-KO-RNA7135	2024592	2027592	3001	62940887	267
TK1545-KO-RNA7144	2024595	2027605	3011	62940686	23246
TK1545-KO-RNA7438	2024753	2025116	364	13402396	160
TK1545-KO-RNA7675	2024906	2024993	88	3443147	125
TK1545-KO-RNA7861	2025032	2025151	120	6259562	730
TK1545-KO-RNA7877	2025039	2025158	120	6186770	475
TK1545-KO-RNA7880	2025039	2025142	104	6012651	153
TK1545-KO-RNA7904	2025049	2025129	81	5554294	243
TK1545-KO-RNA7936	2025071	2025147	77	4783870	1088
TK1545-KO-RNA7968	2025091	2027110	2020	44324455	151
TK1545-KO-RNA7972	2025093	2025187	95	4564043	639
TK1545-KO-RNA8002	2025116	2025213	98	5374886	190
TK1545-KO-RNA8012	2025117	2025252	136	6288844	106
TK1545-KO-RNA8026	2025123	2025492	370	9889769	141
TK1545-KO-RNA8104	2025184	2025298	115	4308453	216
TK1545-KO-RNA8114	2025189	2025310	122	4452102	113
TK1545-KO-RNA8243	2025288	2025373	86	2482090	2783
TK1545-KO-RNA8246	2025289	2025390	102	2717045	171
TK1545-KO-RNA8504	2025563	2025777	215	6091425	314
TK1545-KO-RNA8539	2025617	2025753	137	4159731	152
TK1545-KO-RNA8542	2025626	2025739	114	3748463	123
TK1545-KO-RNA8743	2025809	2025984	176	4994883	123
TK1545-KO-RNA8852	2025929	2027550	1622	29746624	155
TK1545-KO-RNA8885	2025959	2026053	95	2982698	338
TK1545-KO-RNA8887	2025959	2026017	59	2641404	107
TK1545-KO-RNA8890	2025963	2026065	103	3208218	101
TK1545-KO-RNA9242	2026449	2026561	113	2876557	198
TK1545-KO-RNA9354	2026703	2026818	116	3102745	133
TK1545-KO-RNA9472	2026899	2027062	164	4924205	136
